# Supplementary material for: The Drosophila ZAD zinc finger protein Kipferl guides Rhino to piRNA clusters
Source: eLife. 2022 Oct 4;11:e80067. doi: 10.7554/eLife.80067 (PMC9531945; doi:10.7554/eLife.80067)
Supplement: Figure 4—source data 1. [file elife-80067-fig4-data1.xlsx]

## Sheet: Sheet1
TE	GC content	nr of GRGGN motifs	soma index	TE class	Kiperl-dependency	MTDxrhish_antisense_perkb	MTDxwsh_antisense_perkb	MTDxkipferlsh_antisense_perkb	sequence used in this study
1360	32.5	4	-2.02151	GL-Rhidep	Kipf-dep	887.172	4793.22	1891.92	CAAAGACACTAGAATAACAAGATGCGTAACGCCATACGATTTTTTGGCACACGATTTTTTTGCCGTGGCTCTAGAGGTGGCTCCAGGCTCTCTCGAATTTTTGTTAGAGAGCGAGAGAGCGAAGAGCGCTACAGCGAACAGCTCTTTTCTACGCATACAGTGATAGCAGACAACTTTATGTGTGCACACGTATGCTCATGCATTGTAAATTTGACAAAATATGCCCTTCACCGTAGAAGTTCTTAGACTTTAAATCTATATTATTTTTGATCAATTGGCATCATGCGAAAAATTCTTGTTTGCATTGCCTTAACGTTATTATTATTTGAAAACAGATTAGAAATAGCCAAATCCATGTACATATCATAACAAAATAAATTTCAAAAATTACTTTATATT…
1731	46.2	16	-2.66542	GL-Rhidep	Kipf-indep	518.915	2779.97	3134.32	TGTTGAATATAGGCAATGCCCACATGTGTGTTGAATATAGGCAATTTCCACATGTGCATATGTAATTTTGTATGAGAACATACATACATACACATGAACTGTATGTATGTATATATATTAGCAAATAAGCAGCCGCATGAAGGTGGCATTTTTATGTGTATCAGTTTCAGTTTCAAATAAAACTTCTTCGTGTTCGGACACGCGGCTCAAGACTTTTTATTTCGCGTTTACTCTTTCAGCCTTTGCTCTCAATTCGCTGAGTTTGGGTGAAGATTAGGATCTTCCCATTATGATTGTCAGTGTTCCACACTTGGAGCACCTTTTCAATAAACAACAGGTTAATGGGCCCAGCGCCCTAGGAGCTGCCTAAAGGAGAAACGTGTAGTGAAACTCAGGAGT…
17.6	34.4	10	-0.393192	GL-Rhidep	Kipf-dep	16.0049	6917.19	1666.48	AGTGACATATTCACATACAAAACCACATAACATAGAGTAAACATATTGAAAAGCCGCATACGTAAACAATAAGTGACCACCATGCTAATGTGGATCAAATAACAAAAATATCCACTCTGCATTTTGACACCCCCATACTGTATGCCATCTGCGCAGTATGCATTCTAATAAACAAATTCTTTGACAGCGGCACTTAGCCATTCTTGTAAACAAATCTTAAAGTCTGCCTGCTCTCTCTGAGGCTTCTCCTCCACTTAAGAATCCAAGAGCAATGCTCTCCCAAAAACACTAACATATTCTTTAAGCAAGCACAGAGGCTTCTCCTCATTTTCACTTTCATTTGATTTTCAGTCTTAAGCTGAACGTTAATCAATAAACAACACAATCGATACCGAAATT…
297	33.3	12	-0.9258	GL-Rhiindep		11850.7	12010.1	9619.66	AGTGACGTATTTGGGTGGTCCAAACCAGCCACTTCCATTATTTCAAAGAAATCAGTAATGCACTCTAGTAATTTTCCATAACTGTATCCCAGCTGCGCAGACTCGTTTATCTTTTGCAGCGCAGCGTTCTTTGTAAACATCCTAAAGACCTGCCTAAGCAGATTTGACTGCCCTCTTTCAACGCTACCTAATCTTAAGAACCCAAGAGCGAGGCTCTCCCGAAATACAAATATTGTTCAAATACTGAGGCTTCTCCTCAATCCAATTTGCATTTGATTTTTAGTCTTAAGCTGAGATCCAAAGAATAAAGTCGTGAAACTATTTCTCCTAAAAACTATTTTTTATTTCTTGGCGTTGTCCTTAGTCAACTGACGGGACATTAGTTCGACTCATAAATAA…
3S18	47.4	24	-5.30885	GL-Rhidep	Kipf-dep	39.453	3013.16	530.914	TGTTTGGGAACGAGACACCCTGTATACGCGAACAAGTCACCCTTTATCTTTATTTACATTCTTATTTGTCTGCAGCTTCATCGGAGCTTATCAGCGGAATCAATGTAAGCATCGCACCGCTGTAATTGTCCGCGAGCTTGCCCAGTACTTTTCCAAACTTCTAACTCCCTTCTAACTGTAACTTGTTTACGTCTTATGCTAGACTAATCGTATGGCGTGATTACAGCCAAAGCTGAAGTCAGTCACAATTTTGATCTGCGAGAAAACGTACGCATCGGTGTCGAAATAATTAATATTAAGTGTCTGAACTTAACCAATAAATGAAAATTAACAGTAACACTGGCGGTTTTATTTATAAACATAAAAATTGGTCCTTCGAGCCGGATAACCGGAAGTGCG…
412	35.5	9	3.92464	SO		8013.15	13382.1	8647.07	TGTAGTATGTGCCTATGCAATATTAAGAACAATTAAATAAAATAGCATATTAACTTATGGCAGCACTTTGTTGCTATGTTTATGTTTATGTTTATGCACGCAGTTAGGCCAGGGCGGATGTAACATGATCACCCACTCGAAGGCCACAAAGTATAAGTGCATTGCCCAATCGAAGGCAAAAAGTATAAGTGCATGGTCAGCATTCACACGCCGACCAAATACATATTACATACGTACATACATATCTCGCTCTCCCGATAAGCCTAGATATATAAGATATACATAAGAACGCCGCTCCGCTGCTGGCGTACCCGGCAGCGCAGCTACGCGGATTAGCCTAAGTCCAAATATATAAAAAACTGTAAAATCGGAGAGACTCTGTAGACGTTGAGCTGACAG…
accord	38.9	20	-2.73368	GL-Rhidep	Kipf-indep	10.6178	743.452	736.143	AGTTACCATGCCCAGCATTAACCCCCCTCAACAACCACCTCCGCCTATGAAGCCCGCCCGGTAGGCGACATCAGCAAAGTGCCAACGCTGTATATATATATATTGATCACGAGCTACCATGCCAGCATAGCCTCGTCCCCCGCTACCTGAAACTCTGTTGCACCCGATGATGAAATCGGCATGAACACACACACACACACATATTCACACATACTGCGTGGTGGCGACGCTCTCGACGTTGAAATTAACATGAACCTACACACACACATACACACTGCGTAATCGCGACGTCCTCGTCTAGACTCGCTATCTAGAACTAACGGGATCAAAAGCACTGCTGCTTGCCCGTGCGTATACATTAAGAATAAAGCTTTCATCATTCTTGATCTTGACACCAAA…
accord2_new	38.7	11	-4.47757	GL-Rhidep	Kipf-dep	1.40242	196.729	56.915	AGTTAACATACCCCCTCTCTCGGTCTACCCAGTACTGCAACTGAGAGCCGAGCGAAAGTTCAACGAAGATCGCCAATACGAACTCTGACGAAGATATTTGGGAGATACATTATACATATTTGTAATAAAGAATTCATTATCATTCTCATTTCACACCTCAAACTACTCAGTCGTTTTTTTGGAAGCTTTCCTCCCTCGGCCACGGGATTGTAACTGGCGCAGCCGGTCAACGGACAAGGGATTAACAATGCCCACTACGCTTAAAGAGGTATTGAACATGTGACGGCAGTGGTTGTGGGGATTTTATTAGTGAGTGGTGAAATAGAAAGGAATTGGATAAAGCGTATTGAAACATAATAACGTGCAAGTGCAAGTAAAACAAAGGAAACAAACGAAATC…
baggins	50.3	29	-2.28852	GL-Rhidep	Kipf-dep	89.5978	2677.81	792.325	GGCCGCCACGCCAGTAGGTATCACAAGGGGATCAACGCGCCACCAACGGTGGTACGCGCCGTAATTGTGACACACTACTGGAAGTGCAACTACACTCTCCACGCGAGGGCGGCTGGAAACAGGCTCTTAGTTAGGTCATGTCTCTGCTAAGAGTGCTGGCTAATCGTAGTTGGGCTGGAGCTGGTAACTCTCAAAAATTTCCACATCTCCGGGCCGGACTAAGGTGTCATTCGACCCGTGCCGAGAGTCTGCCAGGCTGGGGGCCCGGGAAACAACTAGCCCAGTCGCTAACGGAGAGTCCGGGCAAGTGGCGTCCGCCCGGTCTGGTTAGCCTTACCCGGGTACTGCGGATCTCTGCCCGGGTGGACCGTTTATTTCTCTGCAACTCGTGGGAACCAT…
Bari1	36.1	2	-4.63556	GL-Rhidep	Kipf-indep	134.979	5314.37	10122.9	ACAGTCATGGTCAAAATTATTTTCACAAAGTGCATTTTTGTGCATGGGTCACAAACAGTTGCTTGTGCAGCAAGTGGGGGGAGGTGAAATGCAAAAAAACTTTTGCTTTTGCAAATTCAAACCTATGCAGAGTCAGATGAAAGAAGAATTGAAAAAATAACTGTTCCTATGCGCAAGGAAGAGGCAAATGAAGAGATCTTTATCAGTTGTCAGAAGTATTTGCACACGGTTTCGTCGCATCACAATTATTTTCACAACGCAATTTCTTCTTCAGTGATTGGTTTAGAGTGACAAGTGCCGGTTTGTTTGCTTAAATACATTTAAATTATTGAATAAAAATTAGATTTAATCATTTTCCTATTACAGTTATTAAATAAAATGCCCAAAACAAAAGAGTTA…
blood	36.9	11	0.667325	GL-Rhidep	Kipf-dep	1460.3	6615.28	2290.54	TGTAGTATGTGCATATATCGAGGGTACACTGTACCTATAAGTACACAGCAACACTTAGTTGCATTGCATAAATAAATGTCTCAAGTGAGCGTGATATAAGATCACCCATTTATGCTTTAAGCTAAGTCAGCATCCCCACGCTGGCCGCTGGCCATATATGCGCATAAGCTCTCTCTCTCTCTCTCTTATACATATATATATACGCTGCTCTTCTGCCGCTGTCGACGGCGGCGCAGTCGCAGTATTTAGGTAAGATTAGACACTCTGTAGAGGTTAAGCGGGCAGAACCGTTTCTGCTACTCGAAGAGATAAGAAGAAATAAAAAGGTGCCTGACGGCTGCACCCAACTGCAAGGAAAACACGTGTTCTCAATTGGTGGCATATATTGGTTTATTACAT…
BS	44.7	15	-5.0222	GL-Rhidep	Kipf-indep	6.94938	3237.22	1757.21	AAATCTGCATTCATAGAGATCGGTTGTGTCGCGCGTATGCAAAAGTGATCTATTTTGCTTTATTGTTGCAATTTCTTGGGTGCTTAAAATAGCACTCACCAGTACATTCGGGCGCTGCTTCGTGCGGTGTCGGCATCTGGCCAACAACAAAAAGCGTTAATCGAAGTGCGGTGTAGCTACGATACCTGCCCTTCGGGCAACTTATTCCCCTCACCCCGCGCAAAGCCGCTGAAGGGGGCAATAAAATCTATGCTTATCAGCAAAACTGATCCGTATTTGATCTGTTTTGTGGTCAGTTAAGCAAGCTATTTTGTAAATATTAAGAATTATTATTAAGACAATGGATGAGAACAATTCTGATGACACCCAGCTTTTAAATAAGCAGAGTAACCATAGAAC…
BS3	50	5	-4.46136	GL-Rhidep	Kipf-dep	1.27037	338.588	74.3659	TATCAAAAGGCGATGTGCGCGGAAAGCGCCATTGGCCGATAACAGTGGTGCATGGTGCCGGACTTTTATAGAGCAAGCCGAAGTGTTTGCTGTTCACCTCGCGGAGCGATTCCAGCCTTTGAACCTCGCCAGTCCCCAGGATGTTGACGCGACTCACGACCAGCTGTCCCAAGCGCTCCAAATGGACTTGCCGATGCAACCGATCACTCCCAGCGAGATTGCTGACGTCATCGCCAAACAAAACCCCAAAAAAGCTCCAGGGCATGATACTACCTGCAACTCCACCCTAAGGACACTACCGAGATGTGCGATCCTCTACATTACGTTGTTATTCAACGCTATGGTGAGGCTGCAATACTTCCCTCCACAGTGGAAGCTCGGTATTATCTCCATGATTCA…
Burdock	38.4	13	-5.42819	GL-Rhidep	Kipf-dep	7.29662	2700.45	855.481	AGTTAACACAATCACAAAACACCCGAAATATAGTCGTAAGCCTCAAGTGCTTTTCCCATCTATAGATCGAGCTTTACCTATAAGAAACTGTAACTTGTTAAGCTTTAGAGATAAGAACTCTTGCTATACTTAAGTCAGTCGATTTTGGAAGATTAGAAGCGTCGGTCATCGCCACGTACTTACTATTCGTCTCATTAAGTGCAGACCGCGCAAGCCTATTGTAATTAATAAACTTACGCTAATAAATATATGGAAAATCTACTAAAATGATAATTGGCGCCCAAACGGATATAAAAACCTACGATAACTGAATAATTATAAATAAATAACAAAAGGAGGATCCGGAGACAAAACCAGCGGCTTTGGCTAATTAACTCTAACCTAAGAAATAAAAATTTG…
Circe	40.1	11	-4.13509	GL-Rhidep	Kipf-indep	3.18311	3770.56	1983.32	ATAGAATAAGGCCAATAACATCTGGGCCTCATCTTCAATAGGTACACTTTTTTGTCCGCTTCTTAACCGTTTGGTTATCGTTTTTTTTTTAATCTACCGTATCTCTGTCTACAGTATTGTAGCTGTGACACTCTTGTTCATCTCAACACAAAACCCACGCCCATTTTCCCTGAGTATGCCGGTAAAAATAGTAGACAGAGTGTGTTGGGGTGGACAACGCTCTATGAGTGTGTTCGTTAGAGTTATAATTGGCGCCCAAACGTGGGACAGCCCGATGCCTGATTAGGCACTTGTCGTTTGACAACCGAGCTTCCCGTTAATAAACAATCCATCCACTCTTAGTTTCAGTTAGGTATTTCATATTCCGTCCTGGAATTTATGATATCTGGAGAGTCCCGG…
copia	33	7	-3.01913	GL-Rhidep	Kipf-dep	88.2397	6040.4	3014.39	TGTTGGAATATACTATTCAACCTACAAAAATAACGTTAAACAACACTACTTTATATTTGATATGAATGGCCACACCTTTTATGCCATAAAACATATTGTAAGAGAATACCACTCTTTTTATTCCTTCTTTCCTTCTTGTACGTTTTTTGCTGTGAGTAGGTCGTGGTGCTGGTGTTGCAGTTGAAATAACTTAAAATATAAATCATAAAACTCAAACATAAACTTGACTATTTATTTATTTATTAAGAAAGGAAATATAAATTATAAATTACAACAGGTTATGGGCCCAGTCCATGCCTAATAAACAATTAAATTGTGAATTAAAGATTGTGAAAATAAATTGTGAAATAGCATTTTTTCACATTCTTGTGAAATAGCTTTTTTTTTCACATTCTTGTG…
Copia1	40.8	7	-4.35202	GL-Rhidep	Kipf-indep	898.254	6378.15	8899.76	TGTTGAAATTACGTTATAATTTAAATAAGCTTTATATGTTTTGATCTGGCAACGCTCAATTATAGCTTAAGAAGTCATTGTGAAATTCCCATTACTCAGTTTCAATTAAACCGTCAACTACACCACTACGTTCCTGTGTTTATTTGCTCGGTCGGTCTAGAAGCACATAACGGTTGTCCTGATCGTACGGTAAATCACTAACAGTTGGTTATGGGCCTTCAGCAAGCTAAGTTTTCGGTTTGAATAATTCAAAGTAATTAAATGGACTAACACGCGTCCGGTTGAAACTCGAAATAAATAAAAAAACTAATTTGCGGAATTCGACAAAATGAGTGTGTCAATTCAAATAGAAAAATTAGGCGACGACAATTACGACGTATGGAGCATTTTAATGCGTAG…
Cr1a	40.5	13	-3.30065	GL-Rhidep	Kipf-dep	245.564	7096.82	1099.85	TTGGCTTTCAAAGCGAACGGTCGTTTTTTTTTGCGCCCCGATTTTTATTTTGTGTTTGCCAAACCAGCCGTGGTTTTTAATAATCTTCTTTAATTATCATATATTTTAAACATAATTATTAAAGATCCGTTCGCTTCGCGAGTGATTCTTTGTGATTTGTGCAGTAGTTTAAACAAATATACAAAGTATTTTGCATTTTTCGTCTTTGTGTTTTGTTTACTCTCCCTTTTGTGCGTTGTTCGCAGTGCTGTTTGGTGTTGTTTTTTGCATGCACATAAACTGCACTTTTCGCTCTCACTCTCTCGCTCTTTCGCTCTCCCACACAAAATCTAAATTTCTCAGCGTGCAGACTGCTCTCGTGCGGTTCTTTTAACAGCTCGCTTGAAAGTTTTGATCTTG…
diver	45	15	-4.3897	GL-Rhidep	Kipf-dep	29.8703	1470.56	260.288	TGTACGGATTATGAGCGGAGTCACCCGGTGCTTCAGCTGTCTTAACAGCGGATTAACATTTTATATATCGATGCTAATTGAACTGAACTGTATTCTTTCTTTCGCTCTTGTAATTTTGCGGTCATAGCGATCAGACGTGATTTTTGTATATGAAGAAATAAATGAAGTTAAATAGTGTATATATGATTCTTATTTGCGAACCCCATTACAATGATGTCAAAGCAGTGAGGCATCACAACTATTCATTGGTGGCCCATGAGGGGAACCTTGCTCATAAGAATCATAATTAATAATTGCTAAAAGCTGTTTGGCAATTTTATCTTCGTGGTCGGCTTCATCCAGATAAATCACCGTGCCTACGTTTTCTATCGCGCTCGCTCTCATCACGACAGAGCAGTA…
diver2	49.4	19	-2.51218	GL-Rhidep	Kipf-dep	15.2615	938.235	108.95	TGTTGGGTCATGCAGCCGCCAAAACTGTGCAGTAGACTAATCTCATACTCTTTAATATTGTAAGCCGAAGTAGTCAGTGGTAGCAGTTGCGATGCCCATAGTGCAAACCGCTGTTCTCGCACGCATTTATCTGTACGGCGCTCATTCCTTGTTCTTTTTGTTATCTACCTACGTTAAGCTTGGGCGCTGCATTTCGGCTGTCTGTCCCGCCAATTGCCACTTCTTCGTCTGTCGGAAGAGACTAAACTTGTGCATTCGATATAGCTCTTTGTCGGCCCTAGCTGCTGTAAACAATTCGCAAAATAAACAGTATCGTAAAATAAACAAACTTTCTTCGGCTATTTATTATTCGCAACAGCTATTGAAAAAGCTCAATAGCTAAACATTGGTGACCCCGAC…
Dm88	41.7	5	-2.54044	GL-Rhidep	Kipf-indep	61.8629	2119.41	2858.67	TGTTGAAAATATGTATGTAATATGTATGTATATATAATAATATGTAATAAAGTCAATGCACTGTGTCTCCCTCTTTTGGTCGCGGTAACCAAAAGCTTTTTTCTCTTATTGTGTTATCCTCTTTAGCGTGTAATTTGGCTGCCTGCGTGCAGTAACATTGTACTCTAGATCAGTCACAATAAATACTTGAAACGAATAGGTTATGGGCCCAGCCCACGCGGACATAAAAGTGAATAGTTCTAAACGAATTAGAATATTCGGCATCTTTAAATATTGTGATTCAGGGATTTAATACGAAAAACTTATCGAAGTGAAAATGAGTTCATCAATAAACCAAATAGAAAAACTTGATGATGAAAACTACAGTGCGTGGGCTGTACAAATGAAGAGTGTCTTAAT…
Doc	42.6	15	-1.62412	GL-Rhidep	Kipf-dep	613.676	18973.1	8352.78	GACATTCGGCATTCCACAGTCTTCGGGTGGAGACGTGTTTCTTTCAAGCTACGAATAGCAAGTTCTAAAAACTACAACAGTATAGTGAAAGTTAAACACAAAGTGTAAAGTGCAGTTTGCACAACTAACAATTATTGACTATAGTAATTATTTACTAAAATAAATAATTATTCCATATTGTTCTGGTAATTGTTATATGTGGACTTAGAACAATGAATCAAAACGACATACGTTCTCAGCGACAATGTGAACAAGACGAGCGCCGGCTCTCTTTACAACGCAACAATGCATACTTTTCTTTCGTCTCACCGCAAATCGGTGATCGAGCACCCTCACCTTCAACTAACTCGAAACTTTTGCCCTCAGCGAACGACAGACCGCGTTCTTGCTCTCCCTCTC…
Doc3.element	43.9	8	-3.3677	GL-Rhidep	Kipf-dep	47.357	2208.67	324.671	TGGCATTTCAAGTGAACAGACGTGTTTTCATCGAGCTCCGTATAAAATCACTTGATTTTAGTGAAGTAAATAGTTAATAACATAAAATAAATAAATAAATCGAAAGCGAAAGAGACGCTATTGGCAATGTTAAATTGCTATACTACAAAATTTTCTGTGTGTGGAATAATAAAGTAAAACTAAAAAACAAATAGACAACGAACGAATCGATCGTTCTAAAATGAGCCAACGCGAATTGCGCGCTCAGCGGCAAAAAGAGCAAGACGAGCGCCGACTCTCTTCGCAGCGGAACAATGCATACTTCACCGTCGTGTCTGACGCCCGCGAGTGCCAAATCATCCACCCGGTCAATGACCTAGCACCTGCAGAATGCAAACGATCGCGGTCTTGCTCACCAAT…
Dsim_ninja	55.5	38	-2.67411	GL-Rhidep	Kipf-dep	2.73806	960.676	167.857	TGTCGCGGATCGAATATTGTTATCGATAGGCTAGTATTTTGAGAAGTCCGAATGTGGACGGATTTGTAAGCCCATATGTGTCTGGGCACATTGTTTTCGCCATTGTAAATTGCCGGGAAAATTTAGCTTTTCATTGTCGTGCAAGAGTTGGAGGACACACTGCGGTGAGCTAATAAGTTAAGTTAGTTACAATTGTAAAACATTAATTCTTCCAGAATAAAACGCTTTCTACTACCACGAATTAGTCTGCCCTTTCTTTCGGGAACCAATGCGTGGAGTAGCCGTTTAAGGCAACTCCTTGTGACGCACGACGACAACTTTTTATTCGCAGTCCTAGGCGACTGCAGGGGCAACTTGCGCTGGAATGACGGTTTAGACGGCCAGCTAGAGAGTTGCCGG…
F.element	44.6	11	-1.43983	GL-Rhidep	Kipf-indep	929.429	19816	13205.9	AATCAATTAATCAATTCGATCGCCGACGTGTGAAGACGTTTTTATCGTGCTCCGCACAAAATCGGTTGTTTTGAGTGAAGTGAACGCCAAATAAAATAAACTAAATAAAAAATCTGAAAGCGAAAGAGACGCTCTATGCGATGCAAGATCGCTTAAATACATAGTGAATTGTTATCTTAAATAATAAAACTATGAGTCAGAATGACACTCGCGCCCAGCGTCAGCGCGAGCATGACGAACGCCGACTCTCAATTCAGCGCAACAACGCGTACTTCTCCTACGTCTCACCGACAATCCCAAACGCAGACATCGAGCGGTCAATAACCCATAGCCCAGGAAACCTTCTTCTACCAACAAATCAAGAAAGAGCGCGCTCCTGCTCTCCCGCTCTATTGGCTC…
flea	41.4	10	-4.25107	GL-Rhidep	Kipf-dep	50.141	3875.49	521.768	TGTAACATGAGTAAGGCTGAAGGCTGGCAACAACCCGGTTGGCAGCGCTGTTGAGCAGCAACATGATTGTCGGAAATCCAAGTTATCGACAATCAGTCATCGAAGGACGATCGCAGGCAGCAGTAGAGGCGAGTGGAAGTCAGCGTTGCAGTCAGTCGAGTTCTCAGCAGCAGTCGTTCGGTCCACAAACTAAGAAATACTTTATATAATTACCGCATTTAGAATTAAACTAATAATTAAATTAATAATAAACAATAATAATAAACAATCTTACATGGGGGCTCGTCCAGTCCTAAATCGGTTATATGAAGGTGCAGTTGTTTAAAGAAAAAAGACATTGTTGTGTGCGTGGGTATAGTCTTTAAAACGTTGTAAAGTTGTGGCTATATCTATTGCATT…
G2	51.3	23	-3.20799	GL-Rhidep	Kipf-dep	7.02623	2562.08	578.221	CGAAGACCGGCCACCCCTTTCAGCAAACCCTGCACCATCAAGCTCCCAAGTATCTCCAATATGAGCTACAGAGATGCGCTCATGTCTACCCAAGTGCCTCAGCAAACCAATCCCAACCAAACCCGTCAAACCCCACCTGAATCTCCGCAACCCAGTAACATGGAACAAATGTTTGCTCGCTTCGAAGGAATGGTCGAAAGGATGATGGAGAAGATGTTCTCGCAAATGACGCAGCTTGTTGCTTCCATCCTCAACGCAAAAGTATGCAAAGCCTAAAAATAGTTATTTGGAATGCTAATGGCCTGCAGAGGAGCAGAGCCGAGGTGGAACACCTCCTAAAAACAGATGCCATCGATGTACTACTGGTATCAGAAACCCACTTTTGTCCCAGATCCCATT…
G4	36.7	5	-4.84249	GL-Rhidep	Kipf-indep	7.85426	3343.84	2371.44	CGAAGTTCAAAGAAAAAAGAATTCCCTGGACAATTCATCAAGCACCAGCGCAAATAAATTCGCTCTCTTAAGCGACGGATTGCCCGACAAAACAGGAAACAAATATAACAAAAACGAAGATCTCGAAATGGTAAATGAAGACAGCGCAACTGATTCTGCTAAGCCCCCACCTATCATTCTGTCTGACGTCAATGATATAAGTGAAATGCTAGCCTATCTTAATTCTAAAATTAAAAGAGAACTTTTTTATTATAAGACTCAACGTTATGGACATGTAAGAGTAATGGTTAAAAGTATTGAAGAATTCAGAAAATTAGTCAAAACACTTAATAATGATTGTGTGCAGTACCACACATACCAGCTTAAGGATGACAGAGCATTTAGAGTTGTTATTAAGAA…
G5	50	24	-4.22683	GL-Rhidep	Kipf-indep	8.93006	730.21	1108.48	CGAAGTTCAAAGAAAAAAGAATTCCCTGGACAATTCATCAAGCACCAGCGCAAATAAATTCGCTCTCTTAAGCGACGGATTGCCCGACAAAACAGGAAACAAATATAACAAAAACGAAGATCTCGAAATGGTAAATGAAGACAGCGCAACTGATTCTGCTAAGCCCCCACCTATCATTCTGTCTGACGTCAATGATATAAGTGAAATGCTAGCCTATCTTAATTCTAAAATTAAAAGAGAACTTTTTTATTATAAGACTCAACGTTATGGACATGTAAGAGTAATGGTTAAAAGTATTGAAGAATTCAGAAAATTAGTCAAAACACTTAATAATGATTGTGTGCAGTACCACACATACCAGCTTAAGGATGACAGAGCATTTAGAGTTGTTATTAAGAA…
G5A	47.5	15	-4.26421	GL-Rhidep	Kipf-indep	0.468278	150.039	170.993	CCTCTGCATTTAAAAATGGGCCCCCTTAGGATACCAACTTGGAATTCAATTGGGGCCTCCTTGAAGACCAATGAGTTCCTCGCTCTTATTGAGCTTCACGACATAGACATCCTCCTGTTGTCAGAAGTCCACTTCTCCTCCCGGTCCAACTTCAGGGTCAATGGCTTTACCCTACATACTGCCAACCATCCGGATGACAGCCAACACGGAGGCGCGGCGATCCTTGTTGGATCAAATATCTCTCATCAACCATTCGCCACTCTATCGCAAAATCATATCCAAGCAGTAGTTATTCAGCTGACTGCAAGCAGAGGAAACTTTAATGTTGCCTCAGTATACTGCCCTCCGACTCTTAGATGGACAGATGCTATTGTTGGGCAGTTCATCACACAATTTGGC…
G6	52.8	10	-2.17729	GL-Rhidep	Kipf-dep	12.5779	106.474	18.2848	CAGTCGCGATCGAACACTCGACGAGTGCAGACGTGCCTGCGGATCGACAGCAAATTGTTCACAGTTTTAAGTCCCGTTACTTGTGCCCAGCCACTTCGCGTCGCGTGATCTTGTCGCGCGTTTTGATTGGCCCAGCCAACGTACCTAACGGTAGTTCGCACTAACACCATCGCACACCCGAGTGTGCGTGTTATCAGCGCAAAAAACCCAGTGCTCGAAGCAGCGGTATATTTGCAAAGCAGCAGCCACGTGCTGCCTGGCTCACCGGCTTACGGTGCCCAGCTTCCCCCCCCTCCTCACTCCTTATCAACTTTGGAGAAGATGGACTGGCAGGCCCCCCCGCGCACCCACAAGCTTGGAACAACACCACGCAAAAAGGCTCTGAGAACACGCAAGAGC…
GATE	48	24	-3.29099	GL-Rhidep	Kipf-indep	161.471	4685.67	4967.83	TGTTCAAGTTACGCTCACCCGCTGTCACCCGCTGTCACCCGCTCTCCGCTCCCTCTTACGCTCTCCCGCTCTTCACCTCAGAGTCTCCAAGGAGTCCTCGGGCTTGGGATAGCCTAACTAATTAGAATAAGCATCAGTGTAAAAACTAACCACGCTGAATAAACATACGCCCGGTCGCCGCGCAATTACGAAAAGTCTAGTGTTTGCTTTCCTTCGAGTGTTTCTTTTCAGCATATTTGAATTCAGGACAGCCATCCCCCTACATCCCAACATTTTGGTCCTTCGAGCCGGATCACCTGGATTTTCAAGTTTGTCCACCAGCGAACAAATTATAAGATAAGTACGAAATTTCCATTCCTTTTAATTGCCGGTCTGCAGCAAAAGGTTCGAAAATCCAAT…
G.element	53.3	29	-2.00133	GL-Rhidep	Kipf-dep	276.355	4170.38	1124.63	CGAAGACCGGCCACCCCTTTCAGCAAACCCTGCACCATCAAGCTCCCAAGTATCTCCAATATGAGCTACAGAGATGCGCTCATGTCTACCCAAGTGCCTCAGCAAACCAATCCCAACCAAACCCGTCAAACCCCACCTGAATCTCCGCAACCCAGTAACATGGAACAAATGTTTGCTCGCTTCGAAGGAATGGTCGAAAGGATGATGGAGAAGATGTTCTCGCAAATGACGCAGCTTGTTGCTTCCATCCTCAACGCAAAAGTATGCAAAGCCTAAAAATAGTTATTTGGAATGCTAATGGCCTGCAGAGGAGCAGAGCCGAGGTGGAACACCTCCTAAAAACAGATGCCATCGATGTACTACTGGTATCAGAAACCCACTTTTGTCCCAGATCCCATT…
gtwin	45.5	24	4.56068	SO		2654.31	4367.7	3180	AGTTAACAACTAAGAGCACACACTATTAAGAGCACACATATAACAAATTAATTAATATAAACAATGCTGACGCGCCCAAACTGAGTTCAGCGCTCTGCGCCACGAACGGTCAGCAACAGCAATCGGACACCCCTTATCCGGGGTACCGAGCTATGTTGCATAAATGCTGAGTCGGCTTGCCGACCATGGCTTTATGGCGTGATGCATTGGAGCCACAGTAGATTTACATTTTCATATTCTTTTGTATTCAGTCTTAAGCCAGAGCTTTAATAAAGAGCAGCTATTCACTCCGGCTCGCAGCCGTAAAATATCATTTTATTATTTGAACATTCTCGCTGAGCCAAAAGGCCAGCGATCGACAAAGAGGGCAAAGTCACGCCCTCCGACATAAACTTCATA…
gypsy	45.7	24	0.0145693	GL-Rhidep	Kipf-dep	199.373	2543.79	552.165	AGTTAACAACTAACAATGTATTGCTTCGTAGCAACTAAGTAGCTTTGTATGAACAATGCTGACGCGCCAGAATTGGGTTCAACGCTCCACGCGAAGAATGCCTGGCAGCGGAAAGCTGACACTTCCTACCGGGAGTGTTGCTTCACGCTGCAAGAAATGCTGAGTCGGCTTGCCGACTTGTGGCGGCGCGATGCATTGCTCGAGGGTAAACTTAGTTTTCAATATTGTCTTCTACTCAGTTCAAATCTTGTGTCGAAATAAACCACAGCTTGCTCCGGCTCATTGCCGTTAAACATCATTGTTCTTATTTACAATCAAATCGCTATCGCCACAAGGCTAGTGATAATAACTAAGGGGGCGAAGTCAAGCCCTCCAACCTAATCTCCATAAACAGTGTCT…
gypsy10_new	42.4	16	4.92498	SO		1923.12	3203.15	2318.65	AGTTAACACGAGCAAGTCAGAGGGGTGCGACGACCCGCCGAAATGCCATCCAAGACCGGATGGACCAACAATAACATCGGCGACGCTGAGCCAGCCCAGTAACGCATTTCGCTTTAGCGAAAGCGATGTGCAAGGGTCAGCGTAATGCGAGGCGGGCATGTGCGCGCTGGGTGACCGTCGAAGGCACGGAACTCCAGACGGCACGAGGCGCTGACTAAGCGCTCTGCTGGGACCGCTGCCTCCAACCGAAGACTTGGCGGCCTGAATAAATTTGATTTGCATTTAGTTGGTAAGATACCAGAATTCAGAGCAGTTGGCTCTAATAAAAAGAACCATTCAATACAAACGTATTTGGTTTAATTGGCGCCCAACGCGCTTAAGTGTCGTAAAACCGTAAAA…
gypsy12	41.9	17	-3.66854	GL-Rhidep	Kipf-indep	1.46244	1703.98	886.027	TGTAGAGGCGACTGAAGCAGTGGGTGAGAAAAATCTCGATGAATAATCGATAGGGCGGTCAGCTGTGACACACTAAAGTGAGGTCTTACTAGATGTAGCAAGAAGTAGCTAGAATATACCAGACTGGATGCAACCCTTATTAGCTGCACCCGATAAGTTTGGTATAATTCGGTTATCGGAGAAAATGTGTTGTTCAGCTGATCGTGGTTTCCGCCGATGGCCTACGCCTCGACTAATGTTTCCGGTTTGCCTTCTTTTCGATCTGAACAGTCAACGCGTCAAGTTGCGAAAGTGCGTCGAAAAATTTGAACTTGCGGTCATACGGAATTTTTTTGTCGCGCGAAATATCGAAAATACGGCGTTCCTTCGCCTATAGTGATGCGCGAAATAATTCCGGCT…
gypsy2_new	47.4	23	1.82595	GL-Rhiindep		903.045	1965.55	1248.48	AGTTAACCAAAGCTAACGTCGCTCCCACGGGCGTATGAAATACGACAACATCGGCATACTGCAACGTAAGCATTATGCCGGATGTCGATACGTAGCCGGCAGACACTGCAGATTTGCGTGGCCGCTACGAATATGAGATCGCAACAATGTGTTTCGTTTTCATGCTAGCTCCAAAGTTTGAATTCTTGTATTTTGTATTCAGTTCTGATTTTGTCTCCGACGCTACAGCTCCGCTTAGCTCGGTATAATAAAACATTAAAAGTAACTCCTAATCTTTTATTGTCACGGCTCCGCCTGACACTTGGTTAGTAAAAGCCGCGCGCGTTAACCGCCGGCCAACCCTTTTTCTAATTGGCGCCCAACCAGTGGTATTTGACAGTGCGTTAGTCATTACCCACG…
gypsy3_new	47	34	1.63388	GL-Rhiindep		462.049	1408.68	600.522	AGTTAACTAAGTTAACCGGACTGATCGTCCGCTGACCAGCATTTGGCCGGAAGCTCGAGCATAGCCGGCAAAGCTCTGCACTTTGGCAGAGGCCGCTATGAAGCTCTTCTCTTTGTAAGCTTTAAGCAGTTCGTTTTGGACACTCATAAAATAAAGAGCCATCGCTCATTAACCAACAACTCCGGCATTCTGTCGTTAATTTTATATTTGATCATAGAAATCTGAGTCCCTAGGCCAATTGCATTAAGGAAGACAGTCATCTTCCCAACGTAATCATCGTAATTCTCCAACTGGATTTATCACCCTCTTCCCCTGTAAGAGAGACACCATCAGCCAACCGGCAAATCATGGGAGACTGCAGCGAGGGACCCCCTGCAGCACCCCCACATTTAATAATTG…
gypsy4	40.8	9	-0.177598	GL-Rhidep	Kipf-dep	591.303	3733.26	1145.8	AGTTAACACGCGCAGGGCCAAAATCGCTAACTCCACGATAAGACCGGACGCGGCCGCAGTAACGTCAGCGCGACTGCAACTAAGTCGCGAAATATGACTCCTGCATTCCAACATTCTACTGCCCGGAGCGTGTGAAGCGCAATGTCAGCTTCTGCCGTGAGCGCTGCTTCAGAAGACGGGCTACTTCATATTAAGCTTAAGTTTTCTGTCTTTAGTTTTAAAACTCATCGAACGCGCATAGTCGCAAATAAACACAATAACTAAAATTGTTGTCTGTTAATTGGCGCCCACGGCACTCTTATAGAACTCACAATATTTGTTCACCAGCCAAAGCTGTGACAAATAAACGAAAAAGTGCGAAGTGAACTGTGACAAACAAATTACAAGTGCAAAGCTAAT…
gypsy5	36.5	22	6.74914	SO		2218.96	3300.99	2339.68	AGTTACCACATCTACATCTACTTCCCCACCCCCTAAACCTCCACGCCAGAACCATTAGTTCGTTGGCCCACATCTGACCACATCAGCAGTCCACGCCACTACTTCCCCACCCCCCTAAACCTCCACGCTGAGCCGCTAGTTCGTTGTCCCCTCATGTTGCAACAGTGTAGGCGGAAACAGCGCAGCAAAACGGAGGCATTCCCCAAATCCGCTGGGTCAGCAGATTCGCGACAACACAGAGCCATACATAATACTTGATTCTCCTTTGTAATAAGTCAGTCTTAAGCTACACTCGAGGGGAGTGAGATCAAAATAAAATCACAACCTTAAAGGGAAATACCTTTTAATTAAAATCGGGAAGAAACAATAGAGGGAAAAGAAACACAAAGGACCACAGAA…
gypsy6_new	46.9	37	-0.241094	GL-Rhidep	Kipf-dep	316.141	1954.12	697.158	AGTTAACTAAGTTAACCGGGCGACGGCTACGACCGATCGTCCGAAGACTCGCTCCGGCCAAATTGCTGACACAGCGTCTGGCCGGAAGCCCGTGCATAGCCGGCAAACACTACCCATTGGAGTGGCCGCTATGAGTTTCATATTTTGTTAGCCTTAAGTTCAGTTTGATTTTATATTCAATAAAGAGCGCATCGCGCCTTGAATCGACTCCAGCTTTTGCTGTCATTATTAAATTGGTTGGTTGGTTGACTAGCCTTAAGGGCACTCAACAACGGAGAGACGTTCTCCCACCATATCTTCTAATTCTGAGGAGAAGAGGTCTGCGGCAACCGCCCTGCCTCCCGGATACCTGCAACCTACGCCGGAGACCGCGGCGAGGGATCTACACCAACATAATTA…
gypsy7_new	38.8	10	-5.73534	GL-Rhidep	Kipf-dep	1.13307	222.363	31.2836	AGTTAACACATTCAACGAGCAGCAAAGAGAGGCCAATGCAAGTACTGAAGCTTTCACGATAAGAGGCGAGCTTTTGGCTTGGGATCAAAGGCGAGCTTAAGAAATAAGGGAAGAGCGAATTGGATCATCGAACGCGTCGGTCGTCGCCATGCAGACACATATTATTCAATAAACTTACAAGCTCAAATATAATCCAAATATAATTCGTAGGCCATAGACACGACATCCATAAAAACACAAATCTATTAACTGGCGCCCAACATTCACCTACATTTCCCGAGACAACAAAACTACGTTCAACCGACTTCAACTGCGGATTTTCTTTCAACATCAACAATCAACATCAATACAATAACAAATATTAATTAATAAAAAAAGGATTAACTTAACTTCTGTAAG…
gypsy8	55.6	38	-4.55795	GL-Rhidep	Kipf-dep	0.458922	270.232	3.93142	TGAGGAGTCTTAAAACTCCCCATAAATCTCGTGTAGGGGAGTGGCATAGCAACAGCCGCGGTGCAGGGTAAAGCGGAAAGACCGTGAATTACAGTACAGTACTGGACCTTGAACTCCAGCGGGTCAAGGGCGAAGAGGTCGAACGGTAACGGTGCGTGCACAAAGAAGACGGACGGTGAACTAACGGTATCGCTCTGAAACTTGGAGCGGGCCAAGGGCAAATAGGTCGAACGGTAACGGTGCGTGCGCAAAGAGGACGCACCGTGAATTAAAGGCACAATATGTGGACCTTGTACCCGGGCGGGCCGTGCGCAAAAAGGGAAATAACGGGATCCCTGCGGCCTATAAAAGGTAGGCGCTAGCACGGATGCGGGGCAGTCAGTGAGACAGCAAGATCGC…
Helena	43.3	3	-2.66312	GL-Rhidep	Kipf-dep	40.6989	462.661	119.563	AAAGCTCCAGGAATTGACAGGATTTGTCATGCCACGCTAAAGGTTTTACCTATAAAAGCGATAATATATATAGCACTAATCTTTAATGCTATTTTAAGGATCCAAGTGTTCCCAAGACAGTGGAAAATGGCTGTTATTTTGATGATCCACAAGCCTGGAAAACCAGAAGATGATCCTGAGTCGTATCGGCCTATAAGCCTCTTACCCTCCCTTTCTAAATTATGGGAGAGACTTATTGCCAATCGGATCAACGACATTATAAGACAAGGCAATATCTTGCCGGATCATCAATTTGGATTTCGAAAGGGACACGGAACTATTGAACAGGTCCACAGACTGGTGAAACACATATTACAGGCTTTTGACGACTGCGAGTACTCCAACGCTGTCTTTATAGAT…
HeT.A	42.4	23	-4.71344	GL-Rhidep	Kipf-dep	38.7707	3999.42	1666.71	TAAATAAATAAAATAAATTAAACAATTAACTAAATAATTAAATAACTAAAATTAATAATATAATCCGTTCGCTTGCCAAAGACTCTCACGCGCATAACTAATTAAAATCGATTTTCAAGTTGACAAATAAATGGTTTAAAATTGTCCTCAGGCTGCAAAGAAAAGCCGCGGCAACAATAAACATTTAGTGACACGCGAAAAGCGAACATTTGATTAGTGTAATACTTGTGCAAACCGACAAGCTGCCGCCATAACAAAACGGAGACGAAGAATCATAAAGAACAAAAGCTAAATCCACCAGCATAGCAAAAATAAATTAACAAATAAAATAAAAGCAAATTTAAATAACATAATAAATTAAACTTATTTAATAAACCAATTAATTTTAATTAATTCAAT…
HMS.Beagle	40.1	22	-1.34524	GL-Rhidep	Kipf-dep	121.716	4058.95	704.326	AGTTATTGCCCTGCAATTGATTCTCTAACATCTTGTGGTTCCACATAGTCTCCGCTGCCATCAACGCCAACGAACGGTTAAGCGCGACATCGACACTTCTGCGCTGCGCCGCGGCCGACGCCTGCTGCGCCGCTGCCGACGACTTCACTTGATTGCTAGGGACTTAGGGAAACATTTTGTACGCTAGATTTAGTTTCAAATGATAAATTGCAATAAACGGTCGCTTGCGATCTTCAAAATCAAATCGATAACTGTAATTATTAACTGGCGCCCGAACAGGGACCAGCGAATAAACGCGAACGAAAGACAAAATTCTAAGTCGCGGAGCAAAATCAAAATTTTGCTAAAAAATATTCGTTGGTTAAATTGTGCCGAAGAAACTCCCGCGAGTTATTAACA…
HMS.Beagle2	41.6	28	2.75599	SO		1631.11	3520.93	4715.86	AGTTATTGCCCTATAAGTTATCGTCCCACATCTTATATTTCAACATCATTTCTGGGTAAACACAAGTGCCCAAAATGCTGACCAAAGGTCTGCATTCTTTCCGCTGTCAACGACCAGCTAAAAGTGCGATCATCTGCACTTCTCCGCCGCGTAGCCGCTGACGACCACTGATTCGCTGCCGACGCCTGCTGCGACGCTGCCGACGCCCACACTTGATTGCTAGGGACTTAGGGAAATATTTTGTATCTTAGCTTTAGTTTCAAATGAACAATTACAATAAACGGTCGCTTGCGATCTACAAAATAAAAATCAATAAACTGTAATTATTTACTGGCGCCCGAACAGGGACCAGCGAATAACGCGTACGACAGACAAAATTCTAAGTCGCGAAGCAAAATA…
hobo	37.6	3	-1.661	GL-Rhidep	Kipf-dep	10.5393	131.175	56.2328	CAGAGAACTGCAAGGGTGGCACTTTTTTACCACTCGACTCACACCCTACAATTTTGTGTGCGGGTGCTACTCGCCACGCACATCGCGGGTACTTACAAACACACAGTATAAATCTGAACATGCAGACAAGACACCCCGTTGTGTGCGCACCCGAATCAATACGGTGTTTTGCGTCGCGGGTGCCGCTCACACAGTGCCTAAAAAGGGATGAGTGAGAAAAACACTTGTGGGTATACCGTTAAACACATGGGTGTTTCCAAAAATACTCGGGTGTTTCCAAAAATACTCGAGTGGTCTCGTAGGTAGTCGAGTCAAATGGCGCCATACATAATGATTGTTGAGTTCTTGTGTCTTTGGTCCAGTGTCTCGGCTGTTAATTGCCCCTTTTTTGTTTTTTAC…
hopper	33.2	1	-3.0304	GL-Rhidep	Kipf-dep	22.1849	1350.16	348.992	CACTATGGGGCATTTGGCCTGTTTTTTTTACAAAAATTAATACCTCCTAAACTATTGGAGATATTTGGATGAATTTTTTTTTATGCGTTACACATGCCTCCAGGAATATTTTGGAAAAGTGGGCGTGCCCCAACTCCGCCCCATTTTTTTTTTTTTTTTTTTTTTTTTTTAATAATATATTTTTAAAGTTTATTTTTAATTTCAATAATGTATAATTCATAACCGTCTTCCTCTTCACAATCAGTAGAGTCTGAAGAATTTTTATCAGGTTCAAATTCGCAAGCTAACATTTCAATGACTTCTGGTGGAAGAGATAGTCGCTTATGTTTTCGCCTCTTTAAATTTATTGATGATATTATGGGATCCGAAGTATCCATTGCTCTGTAAAAGACATCTGCG…
hopper2	34.6	3	-4.59664	GL-Rhidep	Kipf-dep	12.6433	301.509	148.782	ATAAAAGTTAAAAGTTTCTAAAGTTAATTTTCAATATTAATATTGTCTAAAATTTCATAGTCGTCTTCCTCTTCACAATCAGCAGAGTCTGAAGAATCGTTATCAGGTTCGAAAGCTAACATTTGAATGACTTCTGGGGAAAGAGGCAGTCGCTTATGTTTTTGAACGCGCCTCCTTAAATTAATTGATTATATTATGGGATCCGAAGTATCCTTTGCTCTGTGAAAGAGATCTGCGAAGCTACAAATACGATTATGCTTTCTTGAATGGTGAAGTCTGTCCGACTTGTAAATTTTATTCCTAGATTCTGCTGCCTCTTCTCCAAAATAGTCGAACTGTTTGCTCCAAGATATTTTTGAAGTGAACCAATATTTTGTGGACTGTCGCTGTCATGGGAAG…
Idefix	33.4	12	0.652969	GL-Rhidep	Kipf-dep	47.1763	2418.73	969.899	AGTGACATATCCATAAGTCCCTAAGACTTAAGCATATGCCTACATACTAATACACTTACAACACATACACCCCAATACAACATACACTACTCCGGATGTACCCAACAGATACCAGATAAGAATAAGATTGTTATATGATCCTCGAGAATGGAAAAAACCCCAATTCTAGATAAGTCACCCACTGGTAGACTAAACATCCGTCCCCTAATTTAAACAATTCCTTGCTTAAGCCTCACCCCATCGTCACATTCCCACGTTCAAAGCTCGGAGCCGCAATCCCGAAAAACAAAAGTATCGATTTCAATAAACAAATTATAAGAATCTAAGAGCACTTGTATCCAAGAGCAAATGCACTTGAATCCAAGAGAAACGCAAAGCTTTTTCTCTTTACGATCAGAA…
I.element_new	38.2	19	-2.62076	GL-Rhidep	Kipf-dep	341.142	1910.92	834.386	CATTACCACTTCAACCTCCGAAGAGATAAGTCGTGCCTCTCAGTCTAAAGCCTCGCTTCGCGTAAGCCCAAAACTCTTATCAGCAAAATCTTGATAAACAAATATCAACCACAAAGAGAAAATAAAAAACTTAACAACAAAAACAACAATACCGCTAATCCGGGCTCAAGCCCTTAACCAACAATCATGACAGACCCACCAAACATTTACAAAATCACTTCAAAAACATACCAATCCCAATTAGGCGAACCTAAATTTATAATTATTAAAAGAAATGACAACAACTCTTTCGAAAGAACTTCACCATTCATCATAAAAAAATCGGTGGACTTTGCCTGTGGAGGAGAAGTTGAGGGATGCAAACGTACAAGAGACGGCAACCTGCTAATAAAAACCAAA…
INE.1	35.4	0	-1.58375	GL-Rhiindep		171.198	663.655	237.791	TATACCCGTTACTAGATTCGTTGAAATGAATGTAACAGGCAGAAGGAAGCGTCTTAGACCATATATAGTATATACATACATGTATATTCTTGATCAGGATCAATAGCCGAGTCGATCTTGCCATATCCGTCTGTCCGTATGAACGTCGAGATCTCAGGAACTATAAAAGCTAGAAGGTTTAGATTCAGCATACAGAGACAAAGACGCAAGTAGCCATGCCCACTCTAACGTCCACAAACAGCGCAAAACTATCACGCCCACACTTTTGAAAAATGTGTTGTTCTTTTCACATTCTGATTAGTCTTTTACATTTCTATCGATTTCCAAAAAAAAACTTTTTGCCAACGCCCTAAAACCGCCCAAAACTCCGACACCCACATTTGTAAAAAATTGTTGGGA…
invader1	42.9	8	-3.09023	GL-Rhidep	Kipf-indep	11.0379	3825.92	2625.67	TGTCGCAGATCATTTAAATGAAACGAAATTTCGTGTTTCTGCTTGGCACGCGCCATGCAGACGCCTCTTTTTATTTTTCTGATGCGCGGCAGACAACCGTTAGAGTTTCTGCCGAACGTAGTCTGGTCGCGGGTAGGAGCGGGGGGGGAAGTAGATGTCTGTACGAAAACGAGAAGCATACAGAAAAATGCGGTGTGCATAAGTATTGGTGTATGCGGACTAGAACAACTGTCATAATTGTGTTGGTATTGCATGTAAAGTCAAGAACTACGCATAATTCTGATTTTGTGAAGAAGAGATCAGTCAGTCAGTTTTCGATCGTTACGCATAACAGACATGCCTCGCTCAAGCGCCAGAAAACGTCGCGCGAACCATAACGAGAGTAGTGAAGAGGAAGAA…
invader2	35.9	12	-4.00205	GL-Rhidep	Kipf-dep	57.3119	3273.99	934.124	TGTAGTAGGCTAGAGGTACACATACATAAGTTCAGTTCATAATAGCAACATAGTATATAAACATTAAGTACTTGTTCGCTTTCGGGTGGCATTCTCTCTGTTTCGCAACATCGGCCCTGTAGCAACAAGCATAGAGGCAGATCGCAAACGGAGAGGGAGTCAGTCGAATGCTAAAGCTGAACACGGAAAGTAACAAATAAATCAAAGAGTCCAACTCCTGCCTTTGTGTGTTTTAGTTAATTAAGAGGATATATAATACCCCTACAATATCAGAAGTGGGCCGATCACGAGCCAAAGAGAAAAAAAAAATGAATATAAGCAATGCATCGACGGCGCAATTAAAAGGATGGTTGAGTGAAGTAAAAGAACCAACCACGGGAACAAAAAGAGAATTGATTT…
invader3	40.2	23	-3.78677	GL-Rhidep	Kipf-dep	3.4357	1630.86	354.923	TGTGGTAGGATGAACACTCATAAGGCCCACGAAGCATACGAGGAAGCATACGAAGAAGCATACGATCATATCCCCGTTAGGAATAAGTATATCATTGCTATCTCGCTCTTACTTATAAGCTAGCATTAAGAGATAAGAATGTACACCTAGCTCACTCTCTCTTTTGAAAGAGCATAAGAAAAGAGGAATACGCGAGACGCGGCATTCGGTGGCGTGAGCTTGAAGTGAGAAGTCGAATAAAGAGATTGTGAAGTTATTTAAAGGAAGGAGCACGTGTATTCATTTTTCGGCGTCCACAACATCAGAAGTGGTCATTACCCACTATGCCTGACACTAAATGGAATCAATTCTCAGTGCCCCAACTAAAGAAGTGGTTGGAAGCTCTTGGATGCCAGACTT…
invader4	42.9	1	-3.28024	GL-Rhidep	Kipf-dep	44.5691	3223.64	321.795	TGTCGGAGCGCGACTCTTCGCATTCCAGAAATTCCTTCTGTGATTTCATATTCTGATGAAATTGTAATATTGCGGTAAAATTCTGTCGAGCGCTGCGGCAGAGGCACGAACAGCCTCTGCAGCTGAGTGAGGTCCGATCGAGTGGTCATAAATAGTGTGTTAGAGAGAGATGACAATGTGGCACACGCCAGTGTGTATAGCCATTAGAGAATATGATGAAGAAGGGACATGTAAGAAGATCCCTTCAGTGAAGTTTGACTGCTGACGTCGATCGGAACTTGCTGCGCTGACGCACAAAATCGCGAAGTGAATAAATAATATGGATGAGACTCCTGTTTCGCCGACATCAGAAGTGGGATCGCCTTCGCCACAAGAGACCAGATCTGATCAGTATATGGC…
invader6	41.4	17	-6.77854	GL-Rhidep	Kipf-indep	1.92849	5367.76	5852.04	TGTCGCATCATTATTAGTCTTATTTTTATTTTCTATGTTCCATCTCTAATAAACATGTCATCTCTATTAAATAAAATTCGTATCGAGCTGTTCTTGTCTTCGTTTCTCTTTGATCGCTGTTCGCTGTGTTCCGTTATGCGAGTTTAACGGGTTTTGCTCTGTTCTACATAGTCTCGGTTCGACGATGCGTTAGAGTGAGACAAATGCTTGTCCTGTGGTGAGTTCGGACCAGCATGTATCAAGCGAGATAGAGCGATGTTGAAATGTACACGGGGCACTTATGTTTGAAAACTCTGAGAAAGCGGACGCGTGAATATGTCGCAACCGAGGAAGTGTACGACTCGCGGGCGGAGCGCGGCAACAGAGGACCCCGAATCAGTTAACTTCCCGACATCAGAA…
Ivk	41.7	19	-3.55456	GL-Rhidep	Kipf-indep	18.3413	2012.46	3092.69	CAGTCACCGACTATCTCTCTTCGAGTGCGGACGTCTGTGTCTTTCCAATTGTGTGCGCTTTGCTTATCGCGTAATTACCATCGCCCAGCTTATCGCCGTTACATTGATCTTTATCATCTTATCTTCTTGATCTTCTTATCAACGCGTACGTGCAAATCCAAAAACATTCAATATCCATAAATTTATTAACCATGGCCCCCGGGCCACTCAATTTGGGGGATAATCGCTTTGCCAGTCTCAGCGTTAGCCCCAAAGCTAAGAAAAAAAGACCCTTTCAAAAATTACAAGTTGATTTCCCAGACCTCCCTGAAACGCAGTGCAAAAATCCGAGATATTTAGTGGTCTCATCAAAAAACTCTCCGAAAACCATATCCGACTACAACTGCTTTGCTGTCCATA…
jockey	44.9	11	-4.29675	GL-Rhidep	Kipf-dep	140.424	4563.82	502.528	AAAAATCATTCACATGGGAGATGAGCAATCGAGTGGACGTGTTCACAGAAGTCGCGAGATAAAACAAAAACGTAATTGTGATCCATCACAAACATCTGCGCAGATCGTGTGCTTATCTCACAAACAAAATCTATTTTTAGTCACTGCATAACGGTGACGGCTTCGGTTCGCGAAACTTATCAGCAACTAGCAATTTCTAAGCTGTGTTGTTTTTGCCCCTCGCCCTGCGCGCTGCGCAAGCGGGAGGTTGTTACAATTTACCTTACAAGTAAACCGGTAAATCTTATCGTGTTTAGTAAATATCAATTGCATTATACGGCATAAGTATAAAGACAATTGATATAATGGAGAATTCATTTGCTCAATCGCGACCTAGCAATGGGTGCGATAAATTTGAGA…
jockey2	43.4	8	1.40169	GL-Rhiindep		39.8011	123.349	81.6884	CCTTCGTTGCATTCGGACGTTCGCGATTGTCTAGTCTTTTTGTAGTGAAACATCAACAAATCTTCCAATCTTACTGTGCACGCGCACAATTTCTATTTCTATCCACTGCACAGCAGTGGTGACAGACAATTACGGTACTTATCATAGATAAGCTCAACCAAGCCGACGCTTTGTACGCCCCTCGTCTACGCCTTGGGCAAGGCTGTTACAGTTTGTTCTCCGCTTGTTATCTCTCGAGCTTGCGAAGTTGACAACTAGTAGTAACACCAATGTTACCAACACCATAACCACGACTCAAGCTAGCTGTTCGCAGGCAAGAAGTGCTGCAATGTCTGATGCCATATTTTTGGGCACTCCAAAAACTATTGTCTCCAGGATCCAATCTGTGGCAAGTGTGCT…
Juan	33.7	4	-4.38172	GL-Rhidep	Kipf-indep	70.7066	1920.14	6066.67	ACAGTCTTCGACTAGCTCTTGTCGAACGCGGATGTAAAATCTTCTATTCTCTCTGAGAACATTTTGGTGTACATTAAATATTTTCTGTTTTCTTCTTTAATTGTGATATTCGCAAAAAACTACAATCAAACGTTCAAGTGATGCAATTGGCGATGCTGAAGCATCTGCCGTTGAAAAAATGCGTACTAAAAGGAATAAACCACTAGTGGAGCGCCAGAACGAACGGGGCTCCAAGCAATTTACAAATTATTTTCGTCCACTACAAACTTTAGACGATGATAATGATGATAAACCTATTGAAACGGACACACTTGATGAAAAAATAATCAAACCACCTCCTATAACATTAATTAAACAAAATACAAAATTTGTACACGAGCTAATGGCTAAAATTAAAAC…
looper1	34.9	5	-6.77581	GL-Rhidep	Kipf-indep	0.690808	631.159	1594.44	TTAACCCTTTCGCGCCCAACGTTGCTTGTGAGCAATTTCTATGTTTTCAGAGCTAACTGTAAGCGTGCCTTTTGTTTTTATCTGCTCATTCTTTATGATAACGGTGCTTTTATGTGTCTACTCTAAATATGAAAAGCAAAAAACGCATTTGGAGATTATTTGCAGAAAATATTTGCAATAAACAGCACGCGCATCACAATAATTATTGTTTCGATATTCGGTGGAACTTTTGGAATTAGTAATTTACTTTTATAATACTTTAAAAAGAACCTAAAGTATAAACAAATAATTATTTAGCAAAGAGTTAACAAGACAGTGATATAGTCAAACTTAGTTAATAGTGAACAATAAGTAAGTAAATAATTTTCTAAGTTGCTTGTGAGCAACCTTGGGCATTCG…
LRsp_Satellite_Rsp	35.3	0	-5.25566	Sat		11.2018	3654.53	30815.7	TCTAGAGATTCTGTTCAACTGGTAAGCAAAAACAGTAAATTGCCTAAGTTTTACATTTTAAGCGGTCAAAATGGGTGATTTTCCGATTTCAAGTACCAGACAAACAGAAGATACCT
Max.element	49.3	41	-3.51036	GL-Rhidep	Kipf-dep	25.856	8546.18	2293.49	TGTTCACGCCAGAAGGGCGCAAACAGTTGAGCGGCAGTGTAAGCGGCCAATGCTTGTACTCGAAGCTCCTCCACGGCTCGCAAGCACCGCTGCTCGCGCTCTCCTTCTCTTCTCTCGCTCTCCTCCCTTCCCGCAGGGTATTCACCACTCCGCGGTCCCGCGGTATTTCTACTGTTAGTGTTAAGGTGGTTGTAATTTACCAGTGCGTGAATAAAGAACGAAAGGTTGAAGTCCACCCCGCGCGTTTTTAATTTCGGGGAAAATTTCAGCAGCCGCCGCAGCAACCACAACCAAAGGAATCTTTCCGCCCACTCCATTTCATGGTCCTTCGAGCCGGATGAGCTCTGATCCTGCCAGCGCTCCTTGCGGAAAATTCAAGATAAGTACGGCTTTAAATCC…
McClintock	35.7	12	-3.54517	GL-Rhidep	Kipf-dep	8.25978	1051.09	361.416	AGTGACGTATTCACGCCAACTCATCACGCTCAGTTAATTGAATATTCGCGCCACCCAAACTGGGCCGCTCTTGTAAACGGATTCCCAAGCTCTCCTCAACGTAAACATCCAAGAACATCACATGATTTTACCGTTTAAAGCTATTTTCTGCGTTATCTGCGTGTCGATCGTTATTACTTCACTTCACAACCTTGGGAGATATTCCGTTTTTTTCCTATTCTTTATTTCTGTAACCCATAGAGGCCCCTCCTCAATTCTCACTCACATTTGTAATCAGTCTTAAGTTGAAAGTTAGACCGTAAAGTTCAATAAGTCTTAAACCGATATTTAATAAAAAACAAAACCGAATTTATTCAGTGTTTAATTTATTTCGGAGTTGATCCTAGTTTAAATACGGAT…
mdg1	33.9	15	2.90583	SO		6066.99	8748.6	5655.57	TGTAGTATATACGAATATAATAACAATAATAATAACAATAATAATAATAATATTAATAATAATTATAATATGAATCATAATAATAAGTCAACTAATAAGTAAACTTAGGACCACCCTAATTCCTTAGGGTCACCCTAGTAGATCTTTAGATACACCCTAATACTAAATATGCGAATTCAGGATGTACGCCTTTAGGGGTCGGACTCGACTCCCATTGGTTATCGAGTATGAACTTCATACATACATATTGCAGAATTTGCTAGTGTCAGCACTTGGCTGTCACAAGAGATCTCCCTGTAGACCACACTAAGATCAGTTATAAATCAGGAATAGATCTGGAATGTACACTCGCTTAATAAAAACCAAATAAAGATAAAATGACCAACTGCGTTTTGAGAC…
mdg3	36.9	7	-3.29158	GL-Rhidep	Kipf-indep	348.396	3802.48	2201.34	TGTAGTAGGCTGCACCTTCTACCCTCTTCCTTTACTCTTAGTCATACATACCTAATTATACATAGCCAATCTAGTCATAAGCTTATACACTCATACACCCATCCTTAACATACAAATATTATCGAGAAACTTATCGACTAATCGACTCGCCACTCTGCAGAGAGCGCGGCAGTCAGTCGCTGTTGAACCAAGCTAAAGGACAGATCAAAAATAAAAGAGACACGTGAAATTGTATTAGAATATTAACTTCTGTAAACGGCGGCTAAAATCTCAGAAGTGGGATTAATAATCCAAAATGGACGATAAAATCATCCTGAACGACTTTTCGCTGACAACCCTAAAAGATTGGCTACGTATTCTGGGCCAAAATACGGAGGGCACAAAAACCGAATTAATCGC…
micropia	42.4	13	-3.42012	GL-Rhidep	Kipf-dep	19.0353	6353.96	704.66	TGTCGTGGCGAAAATAATGAGTATGCGTGTAGTCGCTGTTTACTTCTTCTCCATGTTCCCTTTGCTATTATGCGTGTTCCTATTTATGAACACGTGGCGAAAATAATAAATGCGTGTAGTCGCCGTTTACTTCTTCTCCATGTTCCCTTTGCTATTATGCGTGTTCCTATTTATTGTCAATGTGTGAGGATGAATAGATGAATTATCTATGAACGGGATTTTGCAAAAACGACTTGCGCTGCTTGGTTAGAAAGGGAAAACTATATAATGAAAAGGGAATGCCAAAAATTGAGAAGAGACAAAGCAGGCTGCACGAAGCTGGAGTGAGGGCATTAATCGTGGAGAAGCCAAAGCAGACGCAAGTGGACTCGTTGACTGCGCACAGCTGCATAAAATTAT…
opus	45.4	28	-2.66549	GL-Rhidep	Kipf-dep	1055.84	8815.8	2168.89	AGTTAAGAACCCTCTTCTTGCGCTCTTCGTCAGGACTCACCAGCGCTCGGCTCTCGTGTTTTCGGGCCCCGTCAGCAGGCGACTCGGGGCCTGTCTAGTAACATGTTCGTGTAAGTTACGAACCCTCTTCTTGCGATCTTCGTCAGGACTCACCAGCGCTCGGCTCTCGTGTTTTCGGGCCCCGTCAGCAGGCGACTCGGGGCCTGTCTAGGAACATGTTTGTGTATGTGTGCATTCGGAACAAGTGCCGTTGGTCGCACTCAGGGTGAGGGGTCAACGGGGGAAGCGGATATAAAAGCAGCGGGGCGGGAGAAGAGGTCCCAGTCTCGAACGGACACATAACGGAACCGCTAGCAGATCGCGAACTGAATCTTAAAATAAAGCTAATCGTAAACTCGA…
pogo	35.5	0	-3.03195	GL-Rhidep	Kipf-indep	283.805	2558.44	5576.85	CAGTATAATTCGCTTAGCTGCATCGATAGTTAGCTGCATCGGCAAGATATCTGCATTATTTTTCCATTTTTTTGTGTGAATAGAAAATTTGTACGAAAATTCATACGTTTGCTGCATCGCAGATAACAGCCTTTTTAACTTAAGTGCATCATATCAGCTGTTTTTTTTGCCAATTTCAATGAATATCATCAAAGTTAGCTGCGCCATCTATGAATCATTTTTGCATATCTAAAAGATGCAAGAATGCCAACTCGTTTCAGTATCTGCGCATGTCCGTTTTTGTTTTTGCTTTGATCGTGATTTTTGTGTTTTTGTTTCTTATGGCACAAAGTTATTAAAATGGGTAAAACAAAGCGTGTCGTTGGACTAACACTAAAGGAAAAGCTTCAAATAATCGAG…
Quasimodo	33	7	0.357567	GL-Rhidep	Kipf-dep	514.942	4469.52	841.457	AGTAGCATATGTGCCATAGTATAAGACCACATATACTTACACACACACACACATACATAACCACATAGGAACAGCCATACACAAAATCATAGAATGCCTTAGGATATAAGTCATAAAATCATGTATCCAATAAGAACCCAAATTCTGGTGACAATAACAAATCCAGCCTACCCTAATGTAAACATTAACATCCGCTGCCGAATCAGTTATTCCCACCAAAGGGTCAAAACCGCTTACGCAGCTCAAGTTCTCGGCTGATCAGTACCCATGAGTGATCCACTCAAGAAGGCACCCAATCCAACAGACATAAACATCCGCAGCCGCATTCGCGACTCCCACCAGAGGGTCAAAACTGCTAACACAGCTTTAAGGGTCAAAACTTTCCACGTAGCTCAAACT…
R1A1.element	55.5	29	-2.7584	GL-Rhidep	Kipf-dep	47.4298	13018.8	3683.31	CGGACGTGTTTTCGTTGCGCTCGTGGACATAGTGCGAAGAACTTTGTTTTCCGTATTTGGAAGTATACGGAATAAATAATTTAGTGTTCCGTGGAAGTGGTGCGCAAATTTTCGCGAATTAAAAACAAGCGGTTTGGAAGTAATTGACAATAAATTATTGGAAATTTTCCACTCCGCACGTGTTGAGCGGCGGAGCTTGCGGGTGAGCTTTTCGAACAGCTGAGAGAAGCTTATTGGTGGTAGTCACCGCTAAGGATTGTGTCTTGGGACAGCTTAGTGCACTCTACCAATAGGTGGAGCTATCACCATAGCAACTAGCCCGTGTCAGCGAGCATACGATTGCTGGACTCGTCAAAAGGAGGAGCCACCATCGGAGCAACGCCGATGGAGAGCGACAGC…
R2.element	47.6	21	-4.68998	GL-Rhidep	Kipf-dep	1.1708	217.322	82.135	TTGGGGATCATGGGGTATTTGAGAGCAGAGGGGGAGTATTCTTCTGTAATTCGTAAGTCATATCATATGATGTGCGGAAGGGGAATTTTACTCTGTAACTCACAAGTCTCTCCTTTACTCAAGTCGACTCAAAACCTCCTCGTGGTGGTCCCGGTAATGCTAAACTCGTTTAGCAGCTAATTTGAGCGGAAAAACTTTTCCGATGGGCTGGTTCCCCAGAGGAAATTTATTCATATTGGAACTACAAGCACAAATAACGAGCCTCGGATACCTTTACACAATCTGATGACGACCCGACCCTCCGTGGATATCTTCCCGGAGGACCAATATGAACCAAACGCAGCGGCTACTCTATCTAGGGTTCCCTGCACAGTATGTGGCCGGTCCTTTAACAGCAAG…
Repbase_Bica	43.5	13	-3.47767	GL-Rhidep	Kipf-dep	20.2277	1283.98	538.786	TGTCAAGAGGAAGAGCATGAGAGAGGGGGAGTTGCTTGCGAGATGCCAGGGAGTGCGGACGTGTGCTCGCTGCGTGAACGATGAAGGCAGATGTATACTGAAGACATATAACTATTGTAACACATTAATAAAAGAAAAGAATAAACATGAAGATCAACCTGACAATTCAGAAGTGGGATACAAATTCATTTCTAAGTGGAAAATGTGAATTAAAGAAAACGAGTTAAATAGTAAACGATTGGATTAGAGACGTACAACAAAACGGCACGGAATAGCAAAACGGTTGTACAAGAGCAAAGAGAGATTCGGAAAAACGGCACGATATAGCAAACGTCGAATAAAAAAAAAAAAGGGAAAAGAGGAATAGTAAACGATTGGATTAGAGACGTACAACAAAAC…
Repbase_Chimpo	50.8	22	-3.6415	GL-Rhidep	Kipf-dep	7.11724	2203.08	504.825	TGTGGCGCCCAGACTGAAGCCCGGTCTGGCATCACGGCGAAAACAGGTACTAACGCCAAGACCTTTCCTGGAGGACGATATCTTCTGATATCGTCAGACTGGACACACTGGAACTTCAGCTCCGCCGCGCAACAAGCTTACGGCATTAAAACAACAAGATATTGTACTTAGTAATTAAATAAAGCGGTAACTACATAAGTTACCATATTGGTGACCCCGCAATAAGCAAAATGCAGAACACCGGAGATTGTTTGCCTGCACCGCCCACTTCGCCTGACTCTGGTGAAATTCAACGCGGCAACAGCGCAGGCACCGTTATTCCTGTCGTCGAGTCGGTTGCCACCATCAAGCTACCGCCATTTTGGAAGCAAAATGTGCGGTTATGGTTTGTGCAGATCG…
Repbase_Chouto	43.7	24	-4.60939	GL-Rhidep	Kipf-dep	1.44877	369.514	110.932	AGTTAACAAGTAACATCAGGAAAAGCTGCGTGTGACGACGAACGACACACGAAGCTATACTTCGGATGCTGGTCGGCGGCCGTGATCTGTGCGAGATAGGGTAATCTTAAGCTTTCTTTCTTTGTATTACTTAGTTCTGAACTGACAGCCGAAATAAAGTGATGTTATCGTAAGATACCTGCCGTGAATATCAAGTCGGAGCTACGACCCTGCTACCGGCTTATTCCAGTTGGTCACTTCAGCTATAGTCACCGATCGTGGACACCACCTGATCCCGAGGTGATCCGCACTCTGCACCACACCGCCGCTGCAGAGGCGACAACGAGGTGACTGTGTTGTGAGCAGCAACGTGTCGCAACACACATTCAGCAACCACTTGGTCACTTTAGCTATAGTCAC…
Repbase_DNAREP1	39.1	2	-2.45514	GL-Rhidep	Kipf-dep	293.678	1702.98	456.396	TTATACCCGTTACTCGTAGAGTAAAAGGGTATACTAGATTCGTTGAAAAGTATGTAACAGGCAGAAGGAAGCGTTTCCGACCATATAAAGTATATTTATATATATATATATATTCTTGATCAGGATCAATAGCCGAGTCGATCTGGCCATGTCCGTCTGTCCGTATGAACGTCGAGATCTCAGGAACTATAAAAGCTAGAAGGTTGAGATTAAGCATACAGATTCTAGAGACATAGACGCAGCGCAAGTTTGTTGACCCATGTTGCCACGCCCACTCTAACGCCCACAAACCGCCCAAAACTGCCACGCCCACACTTTTGAAAAAATTTTTTGATATTTTTCATATTTTTATTAGTCTTGTAAATTTCTATCGATTTGCCAAAAAACTTTTTGCCACGC…
Repbase_FB4	32.8	9	-1.51702	GL-Rhidep	Kipf-dep	26.1374	163.599	40.4945	AGCTCAAAGAAGCTGGGGTCGGAAAAATCGAATTTTTGAAATTTGAAAGCTGGAATCGTTTGCCCATTTTTTGCCCATGTTTGCCCACCAATTAGTTTTTTTTGCCCACGTCCAGTTTTTGAGATATGGATTTTCGAAAAAGTTCGAAAATGTTCGAAAATCAAAAATTTCGCTTTTTTCAAATTTTTTTTTTTTTAAATCGCAATAACATCGTTTGCCCACGTTTGCCCACCCTTTAGAATTTTGAAAAAATTTATACTTTAGAAAATATAAGGCTTTTAAGTTTACCTCGGTCTAATCAGAGAGTAAATCGTTTGCCCATCTCTTAAAACCAAATATTATCAACAAAAAACGTTTGCCCAACCATTATTATTAGTTTTTATCGTTTGCCCACCCTTT…
Repbase_Rt1a	53	30	-4.25117	GL-Rhidep	Kipf-dep	17.8628	9975	2288.13	TCGAGTTCCCGCGTATTTCGCACGTCTTTTTGCTGCGCTGCGCGAATTTCGTCATATACGAGTCCGGTCAGCCGTAAACTGCAACATAAACCTGCAAATCCACTCTGGGGTTTGCGCCGCGTTTCTGAGCGTCACGGTGTCGTTCCGGAATTCACGAGTGATCCAGTAAACTGGTAATAAATCAGATCAGCTGCATCAGACAATACAGCTGATAGCATTGCCAACCTTTCGCAGTCGACGAGCTGGTAAGACTGGCGTTGCCAGATCAGCGGTGCGATCGTCATTCGGCCGCGCGCTCGTTGGGCGCGAAATTCGAATTCAAATTCAAATTTGAACTAATTAAGTTGAACAAAAATTTGAAATATAACCTAAGAACTGAAGCTAGTTCTATTTCCCACG…
Repbase_Rt1b	54.7	30	-3.53616	GL-Rhidep	Kipf-dep	25.8227	13445	3202.06	ATAAAGCAGCTGATAGCGCTGCCAACTTGGCGCAGCGGGCGATCTGGAGAGGGAGGCGTTGCCAGATCAACCGTGTGATCAGTGTTGTGTTGCGACAGTAGAGCGCGAAATTCAAAATTAAACTTAAAATTAAACCGTTGAATTTTAATTTAATTTTAATTTTGATTCTGGTTACTGGGAGCGCACAAGTCTTTAAGAAAGGGGAAAAGGCACAAAGGTCGAGGACAGACCAAATATCATCCTCTCACCGTGCTGGTGCCTAAGCAGAGGCTCTGGTGTCCGAGTCGAGGCGGTACAAACCTCCATCCGTAAAAGCCAGGGGGAAATCCGTGGCCTACGTGGGAACCCCTTTCTAAGGCTGGTGCTTCGCCTAGGTAACCTTAGGCCATCCTTCAGTTG…
Repbase_Transib1	32.3	7	-4.00516	GL-Rhidep	Kipf-indep	4.85013	103.601	358.172	CACACTGGTTTTTTATGTGTTTTTTTTTGGCAGAAAGTCAAAAAAAAATATTTTAACGGAATAAAAAAATGTATGGTTTCTTTATATTTAGGATAGTCTTATTAGATAAAAAGTCGATTTTTACTTTTTTACGCAAAACTGGCTTATCGTCGACCTCTCAAAGACAGCTGATTGTCGATAACATGCGTAAGACAAAAATTGATGGCAAATCATTTTGCAACATTTGTGGTTTATATTTCCTCAGAGAATTAAAAAAGTTTAAAGTGTTGTCATGGAAAACAGTAGCACAGGTATGTAGATTTGTAGTTCACTAACATTTTTGTGTATGTTATATGTTTTTGTGTAGTTGTATCGTGTTTTGTTTATGTGCCTTTTTTACAGTCAACTTAACAAATGTAG…
roo	34.7	23	-2.76018	GL-Rhiindep		8241.95	21531.3	11342.2	TGTTCACACATGAACACGAATATATTTAAAGACTTACAATTTTGGGCTCCGTTCATATCTTATGTAAATGAATCGAGAGCGATAAATTATATTTAGGATTTTGTTATCTAAGGCGACATGGGTGCATTGCTCAAAAACATGTAATTTAAGTGCACACTACATGAGTCAGTCACTTGAGATCGTTCCCCGCCTCCTAAAATAGTCCCTTAGTGGGAGACCACAGATAAGGTCCTCGCCGCTCAAGATAGGCAGATGTGCCCGAGCGTGGGACCTCGATAAGGCGGGGACTATTTACGTAGGCCTCTGCGTAGGCCATTTACTTTAAGATGCGATTCTCATGTCACCTATTTAAACCGAAGATATTTCCAAATAAAATCAGTTTTTTTACAAAAACTCAAC…
rooA	40.7	18	-4.84292	GL-Rhiindep		1521.61	3933.37	3139.13	TGTCTAAATATGTGTTTAGACATGATAAGTAGGCAAACTATAAAAATGTTCTATTTATGGGCTGCAATAAACATGTCACTGGACAGCATAAGTGGCAACTACAGATAAGTACGATTGCAGCGGCCTATTGCCGAAGTGTCAAGAGATATGACCACGCGGGAGGTGATTAGCGCGGTCATAGTCCTCAAACATAGATTTAAGAATAAAACTCAGCTGCATTTACCAACGCAGACTGCGGCGTCTTACAAGCGCTGCATTATATAATTAGATGATAAGAACCTATGTAAGAATGAATAAAAGGCGAAGCCCTCGCAGTAGCGAGTCAGTTAGATTCAAACACCCGAATTGAACTCATTAAGTGTACGCACAAGTTTATAGTGTGAACATTTTCGTCCTTTC…
rover	35.3	8	3.34707	SO		1298.88	2421.38	2201.81	AGTAACATAATATGCTTCTCATATTACGTTTACATACTTACACTAATTGTACATACAATCTTGCACATGCATAAACACATGAAACCAGTTTACATTTTTACTTACACTTAAGCGCATAATTTGTTGTGCATCCATACCGTTATTTTTCCGTTCTTTTTTGTACACATATACTGATTAGACATTCCCGTTTCTCGCGACTCACTTCGAGCCGATCAAAAACTCTGTACAGTCAGTCTTAAGCCGACAACGAAGAAATAAAGATCTAAACTAAAAAATACCTCGTGTTGATTCTGAAACTTCTTTAAAGGCGTTGATCTTAGTCAAACGACGGATCATTTGTTCGACTCGAATAGTAAAATACGTAAGTGGCGCAGTCGGTAGGATAATACATTGTTGATG…
RRsp_Satellite_Rsp	34.2	0	-4.77335	Sat		19.4356	8024.98	52571.5	TCTACAGATTATTTAAACCTGGTACACAAAAACAATAAATTGACTAAGTTATGTCATTTTAAGCGGTCAAAATGGGTGATTTTTCGATTTCAAGTACCAGGCGAACAGAAGACACCT
Rt1c	56.9	29	-6.33345	GL-Rhidep	Kipf-indep	0.119365	81.6691	86.1929	GGGGACGCGCGCGAGTAGCCGTGTGAATCGAGTTGGCGCTCCTGGAAAACCCCAAAATTTTCCGTGTCGCGGCGGCTTGATGGAGACAGGAGTGGCTGTCTCTAACACACAGTGCCGATATGAGTACTCACCAGCAGTGGGCAAGCTCCAAGTATCCATGGATCGCCCGCCGGCGCCGATCCTCAGGGCCATGGAGCAGGTCAGGGTGAGAGAAGCAGCGAACTTTCTCTGCACTACTTTCTCTTTGTCGCTGTGTTGTTTCTTTTGGCGTCTTGGCTGCCACCAGACTTGCCGGTCACGCCAGCTGATCTCGCAGTCAGCTTGGAAAGCAGTGCTGGTAAACGGCTAAAGCACCGCGGTCTGGCAGCGCTGGTCGGATGCACGAGTCCCCTAGCACAG…
Satellite_260bp_1pt688	28.1	0	-0.519931	GL-Rhidep	Kipf-indep	48.0915	1628.81	1120.73	TGGAAATTTAATTACGAGCTCAGCGAGGTATGACATTCCATATTCAGACAATTAATTTTAAAGTTGTGGCAAAAAAACTGATTATTTAATGACCGAAATTTGGAAAAACGGATTTTGCCAATAAGTTAATATTTACTTTTTGAACGATTTAGGGAAGTTAATTTTTGGTTTAATTTTCGAATTTTTTTGAAAGGGGGGTCATCAAAATTTGCATATATGCCGAAAAAATGTAATTTTCATTGTTGAACACAGTTTCAT
Satellite_353bp_1pt688	31.7	0	-0.375788	Sat		21.4049	4761.28	2472.78	ATGAAACTGTGTTCAACAATGGAAATTAAATTTCTTTGACATAGTGTGCAAATTTTGATGATGTTACAAAATATGTGAAAATTTGCCGAAAAATTGATTTCCCTAAATCCTTCAAAAAGTAATGGAGATCGTTAGCACTGGTAATTAACTGCTGAAAACAGTTATTCTTGCATCTATATGACCCTTTTTAGCCAAGTTATACCGAAAATTCCGTTTCTAAATATCAACTTTTTGGCAAAATCCGTTTTTCCAAGTTTCGGTCATCAAATAATCAGTCTTTTCTGCCACAACTTTAAAAATAATTGTCTGAATATGGAATGTCATACCTCGCTGAGCTCGTAATTAAATTTCCA
Satellite_356bp_1pt688	30.4	0	-1.7536	Sat		58.8966	29092.4	191737	ATGAAACTGTGTTCAACAATGAAAATTATTTTTTTTGCCATACTTTGCAAATTTTTATGGGGGGTCATAACAAAAAATACGAAAATTGACAAAAAAATTGATTTCCCTAAATCCTTCAAAAAGTGATAGTAATCGTTAGCGATGGTAATAAGCTGTTCAAAACCGTTATTCTTATATCTATATGACCATTTCAGCCAAGTAATGACGAAAATTCCGTTTGTAAATATCAACTTTTTGGCAAAATCCGTTTTTCCAAATTTCGGTCATCAAATAATCAGTTTTTTTGCCACAACTTTATAAATATTTGTCTGAATACGGAATGTCATACCTCGCTGAGCTCGTAATTAAATTTCCA
Satellite_359bp_1pt688	30.9	0	-0.92781	Sat		82.3566	37876.9	96705.9	CCACATTTTGCAAATTTTGATGACCCCCCTCCTTACAAAAAATGCGAAAATTGATCCAAAAATTAATTTCCCTAAATCCTTCAAAAAGTAATAGGGATCGTTAGCACTGGTAATTAGCTGCTCAAAACAGATATTCGTACATCTATGTGACCATTTTTAGCCAAGTTATAACGAAAATTTCGTTTGTAAATATCCACTTTTTTGCAGAGTCTGTTTTTCCAAATTTCGGTCATCAAATAATCATTTATTTTGCCACAACATAAAAAATAATTGTCTGAATATGGAATGTCATATCTCACTGAGCTCGTAATAAAATTTCCAATCAAACTGTGTTCAAAAATGGAAATTAAATTTTTTGG
S.element	34	0	-5.76394	Sat		346.568	48378.6	149522	CAGTTTGTCAAGAAACTGTTTACACACCGCAAAATAAGTAGAATTTTTGACTTTAAAGGCCAAAATTAAGGGTTTTTTGCTTAATTAAACGCAATTTTTTTATGAAATATAATTAAACAATATTTATTTTACTTATAAATTAAAAAACAAATTCAATATATCAAATATACAAGAAAATAAACAACAAATTTCTTGTTTACACACTTTTGAGAGTGCCAAGAAACTCTTTACACAGTTTTGGGTTCCTACTTTGTTTTGCTCTTTTTCTTAGAAACAATCTCATTTTTCCGTTATTTTTGTCTTATGCATTCCTTTTTACAACGCTTCTATTGCAATTTTTTCACTTTGCTTGTGAAATTTTGTTGATCTAACGTGCTTAAAGCGAATTATTAAATTTAA…
springer	48	26	-0.0602903	GL-Rhidep	Kipf-dep	820.265	3744.58	1257.53	AGTTAACTAAGTTAACCGGACTGATCGTCCGCACACCAGCACCGGTCAAACTGCTGACCAAGCATTTGGCCGGAAGCTCATGCATAGCCGGCAGAAGCTCTGCGCATTGGCAGAGGCCGCTATGATGTTTTTCCCTTTGTTAGCTTATAGTCAGTTTGATTTTGTATTCAATAAAGAGCGCATCGCGCCTTCAATCAACTCCAGCTACTGCTGTTATCATTGAATTGGTTGGCTAGCCTTAAGGGCAGTCAACAACGGAGAGACGTTCTCCCACCATATCTCCCAATCTAGGAGAAGAGGTCTGCGGCAACCGCCCTGCCTCCCAGTGACAGAAGAACCCCCCGTTACCTGCAACCTACGCCGGAGACCGCGGCGAGGGACCTGCACCTTATATTTAAT…
Stalker	35.4	7	-1.79158	GL-Rhiindep		11053.8	25458.4	17785.4	TGTAGCATATTGGACTAATCTACCCTAAGAATACAATAGATGATTGGGTATAACATAGCGTCAATACATTGTGACACTTTGTCATAATAAATATAAATATACAAATATACAAAAAGACCACCAAAAACTACGTAAGCACTCCAGCGCCCCAGTAATACGATCTAACGCTTATACATAAGCCGATCGCGGAGCGTGGGAATGCTGAGCATGCACTTTGCAGCTCAAGTGGTCAATGCCTTCTGCATGCATATGTATATGTATAAATGTAAGTAAGAATACATAGATATAAGCAATGTATGTGCGGGTTAGCTGAACCCAACTTCAGCACACTTTGATCATTCGAATAAACAGATTCAAACAGAGCAGAGGTTCTGAGCTCGGAAAGCAAATCTATTACAT…
Stalker2	34.2	7	0.996661	GL-Rhiindep		4012.84	5492.83	3578.69	TGTAGTGTATCTACCCTCACTATAACTCTACTCTACATATATATAAGTAACGTACATACATTGTGACACTTTGTTGCAAACACAAATAAACATAATTCACATCAAAGACCACATGCACTTACATAAACACTCCAGCCAATGAAATACGATCTAACGCTTATACATAAGCCGATCGCGGAGCGTGAGAATGCTGAGCATGCACTTAGCAGCTCAAGTGGTCAAGCCATACATAACATATGTATGCCTTCTGCATACACATGTATATGTATATACAATATGTACAATATGTAAGAACACCATGTACGGGTAGCTGTACCCAAAGACAGCAACATAGGATTCATTCAAATAAAACGATTCAAACGGAACAGACGCTCTGAGCTATTCAATATCTATTACACT…
Tabor	35.2	10	4.71881	SO		2947.81	4520.16	3478.33	TGTAATGTGCACACATATCGAATAAGCACTGTATCAAATCAGAACATTGGGAACAATCACATTGTAGCACTTTTGCAACAATGTTTATGTAAGACTTTTCAGTTCCCAGGCATATCTTGAGTGCTCAGCAATCTGACCACACAAGAATGCTATTCAGACCAGAAGTGCAGAGTCAGCATAATTAGCATGCGCGACTGCTCGATCTTTATGTCCACATGACTCTCTTAGACAGCGGCGCTCTCGCTGCCAAAGTTAAGTACATAAGAGCAAAGCAACGTCTCTGCCGACGGCCTCTCTGCCGGCGCAGACGGATTGCATTTGGCTAGCTTGGACTCTTCTAGACCAAGTACAAGGCAGTCGTAAAGGAGTCGTCAAAGAGCCTTCAACATGTCCTAATTG…
TAHRE	41.2	43	-4.36644	GL-Rhidep	Kipf-indep	6.11638	874.474	623.632	TTAAAAGCAAAGTTTTTTAAAAGTTCAAAAATATAATAAAATAAAGCAAATTAAATTTAATTAATAAAACAATTAATTTTATTTAATAAAATTAAACGCGCTTCGTCGGCAAATAACTCTCACGCGCAAATTTTATTAAATTCGCCTTTCAAGTTGAAAAATTAAAAGTTAAAATCGTCTTCCGGCCGCAAAGTTTGAACCGCGACGATACAAACATTTAATAGACAAACAAAAAGCGAACAATAAATCAGTGAATTATTTGTGCAAGCTGCCGCCATAACCAAAAGGAGAAGAAGCCAAAAGACGAAGAGGAGAAAGTAAACCAGGAGAAATTAAGAAGACAAGGAGGAAAACTTATTTAAAAAGACGACCTAAACTGGAGGACAAATTACAAATTAA…
TART.A	46.8	43	-3.0749	GL-Rhidep	Kipf-dep	88.4729	4804.31	2199.15	CACGCTTTTTGGCCCCTGGCCGATCTTCATATATCTCAAATCGACGGCTGCTTTTACCCTGGAAAAAAAAAAAGGAGCTTGGGTTATATTGAACTACACTAGGCGGCGACACACTCACCAGCAGCAGCCAGAACAACAACAGCGGCAGAAGTAGCAGGAAATTATCTCACTGCAAAATCCAATTGGCACTTTCCGAAGTCCGTATTTCTCGCCTGGCCCCTGGCCAGTAACAGGGGCCTGTGCGACGGAGATGACGACGATGATCTGCCCTGTGGACGGCCTCAAGAAGGAATCGGCCCTGTACTGCCCACCTGACCTGTGCCAGGATAGCAGCAATGTCAGCGGACCATGGATGGAAGAGGCGGCACTGGCGACGGTCCTCAGTTTTGCGGTTTCCGC…
TAS_2L	37.4	1	-1.06884	Sat		143.752	16037.3	14150.6	TCGACAATGCACGACAGAGGAAGCAGAACAGATATTTAGATTGCCTCTCATTTTCTCTCCCATATTATAGGGAGAAATATGATCGCGTATGCAGAGTAGTGCCAACATATTGTGCTCTTTGATTTTTTGGCAACCCAAAATGGTGGCGGATGAACGAGATGATAATATATTCAAGTTGCCGCTAATCAGAAATAAATTCATTGCAACGTTAAATACAGCACAATATATGATCGCGTATGCGAGAGTAGTGCCAACATATTGTGCTAATGAGTGCCTCTCGTTCTCTGTCTTATATTACCGCAAACCCAAAAAGACAATACACGACAGAGAGAGAGAGCAGCGGAGATATTTAGATTGCCTATTAAATATGATCGCGTATGCGAGAGTAGTGCCAACATA…
TAS_2R	37.4	0	-3.65246	Sat		16.5689	4581.48	1997.2	TTATTAATATTGTTAATTAATATATTATTAATAAATTAGTGTGTCATCCATTTCGTTTATTCAGTTTGTTATTTGGTGCGGCGGCGCAGCAAGTACCGATCAACACGACCATTCAAACTTGACTGAAGGGATCTTCTTACATTTCCCTTCTTCAACATATTCTCTAATATCTATACACACTGGCGTTCACTACATTTTCATCTCCCTCTAACACACTATTCTTGACAACCCGATCGGACCTCACGCAGCTGCAGAGGTTGTTCGTGCCTCTGCCGCAGCGCTCGACAGAATTTTACTGAAGGAATCTTCTTACATTTCCCTTCTTCAACATATTCTCTAATATCTATACACACTGGCGTTCACTACATTGTCATCTCCCTCTAACACACTATTCTTGAC…
TAS_3L	37.4	0	-2.57317	Sat		14.5289	7787.14	4878.43	TTAATTTTTGTTAGTTGCTTTTGTAAGATTATATTCGATAAAAATTGAAAAAAGATTTCCAGAAGGATAATGTTTTAAAAATATAATTTCTTTTATACACCGGCAAGAACAAAACGATTATTAATATTGTTAATTAATATATTATTAATAAGTTAGTGTCTCATCCATTTCCTTTATTCAGTTTATTATTTGGTGCGGCGGCGCAGCAAGTACCGATCAACACGACCAGTCAAACTTGACTGAAGGGATCTTCTTACATTTCCCTTCTTCAACATATTCTCTAATATCTATACACACTGGCGTTCACTACATTTTCATCTCCCTCTAACACACTATTCTTGACAACCCGATCGGACCTCACGCAGCTGCAGAGGTTGTTCGTGCCTCTGCCGCAGCGCT…
TAS_X	37.4	31	-4.22065	Sat		3.91585	334.531	199.63	ACTAGTAATGCCGCGCTGCAACAGACGGGATACACAAACAAAACAATTAATTAATAACAAATTAAATAAAACAATAAAATAATGCACTTACCTCAATGAATACAGCTAATCACTGACCCACATCCAATGAAACAGACAAAAGGAGAAGGGCCCGCAAACGCAAAATAAAATCGCCAACTATGCGATTATAAACACAAAAAATTGACAATTTTGCGATGCCGTCCCCGACTCCTGATGCCACAGCATTGACAAGGATCACTAGCAAGGAGCTGACATTACATTAAAAAGTCTGCAAAATCCGTCCACAAATTTCATATTTTTCCTCAGTATCGTATCTTCAATGATTTTCCGACAACCTGAAAGGAAAGGAAAATTAATAAGAAAATTATACAAAACATA…
Tc1.2	34.1	4	-4.91216	GL-Rhidep	Kipf-indep	5.73035	764.355	382.633	CACTAGTGGGCATAAGTATTTAGACACCATTAGCTTGCAACTGCCGGGCTATGCTTTTCATAGTACAGTCAAATAAATAAGTAAACTATTGATGATAAAACAAAGAGTGCAATTACAGTTACACGCGAGAGGTATGTTTTGCCGTTTACCTTTTCAATTATCCTTCTGCTGATAAGAAAGCTAGACAGACAACGATTTGGGCGGTGGCAAAAGTATTTAGACATCACATTTAATTAGTTCGCATTGATCTGTTGTTCGAAGAATATCAAATTTTTGACTTTTTTAGATCATTTGAACATTTGTTCTTGATAACGTGTTACTACCTACTTTTATTTCATTCATAAATTTGTTAAACATGGGGAAAACAAAGGAACTGAGCGAATTTATAAAAAATGAAAT…
transib2	35	6	-5.02394	GL-Rhidep	Kipf-indep	8.56677	1813.87	1689.85	CACTATGGTCCAGAATTCGTTTTTTTTGGCATAAAGTCTAAATTTTTATGTCAATATATCGTCCTTTAGCAATTATTTTCTAATAGAAAATTGATCATATAAATAAAAACCAAAAACAAAATTGACCGAAAGCTTCACTAAATCGTTTTATGAGCTTTTAAAGGTGAAGTGTTAAACAGCTGATTGAGAGAATGCAATTCCCGCCAAATTATTTGCTTACTTTTGCACGTGGTACGATCGTTAATACGCATCCATAAATTATAGTAAAATATGGAAAATAAATGCCAAGGTATGTTGTTTTTAACGTATGTAGTTAATATATGTGTAGTTGTACTGTTTTTGTGTTGTGTAACATCCAATTTATGTGTATTTTAACAGAAAATTCTAACGTGTCCCCTG…
Transib5	32.8	8	-4.54948	GL-Rhidep	Kipf-indep	2.05671	52.0247	38.136	CACAGTGGTTCCGTCAGAGGCCAAAAATAAAAAAAAACATCTAAATATATTTACGCATAAAGTAACCAAATTGTCTCCAAATAGTCAAAATATTTCCAGCCAAAACCAGTTTTTGCTTCAAACCTAACGGTACTTTCTAAAAATAGAATTAAAGTTATGCACACGTGTTCATTTGTGTAGCGAAATTGCACGCATTGTAATTTCTGCATTCCAAAAGCAAACTTCAAAGGCATCATACTTTCAGTGAGGAGCTTCGATTTAAATAATTTAAAATGGATTTTAAAGTAGAAGGTATTTACTTTGTATACAAAAACTAATAATTAACTAATCAGTTAACTAAGTTAAGTAAAATTAATATCTTCAAATGGCCTTTTTATTGTCTTTTTTGTGGGTATTTTC…
Transpac	33.1	12	-4.07339	GL-Rhidep	Kipf-dep	20.8564	1572.09	639.568	AGTCATGTATACCCTTACATACCCTCTTATTAGATTAAGTTATGTTAGAATACACATGGCGCTAAGCTTTTTGTCTGAGCTTAGCTTTATTTTTAGTCAGTAGATAAGAAGACCTCGATCTGTACACATCATTGAATAAACCCTCAATTTGTTAAGCGAAACCTTTCGTTTTGTTTTAACCCCTCTTTAATCGACAAAGAAGTCGATGGGTGCTTAACTGAGGAGTTCAACCTTCAACCTACAGACGACAACGAAGTCGTTTCTGGAGGCAACGATCTTTTGGACACAACGGTCTCTGCTCGGAAGGCCCTATCAACCTTCCACATAACTGGCGACGAGGATCAACACAGAAAAAATAAGGAAACCAGCCATACGTCAAGAAATTCATTCGGAACCACA…
X.element	50.6	12	-3.74392	GL-Rhidep	Kipf-dep	7.60728	7594.26	1421.8	AATGTTAAATAAAGGTTCGTGTCTAACAATACGCACCTGACAAAGTGGATTAAGTGAAATTAGTTTTCGCGGTAATAAACTTATGGACAAGACCAGAATACTGGCACACATAGCAAATAGTGACCCCCCAAGTCACTAACAGTGAAATAATAGTGAAACGAAAACATTTTCATTCAAAAATACAAAGTTAAGTTTCTCGAACTGGGGCTCCGCTGCCCAGCTGCCACGCGATCGCACAAACAGCTGTTTGCGAGCTTAAAGCTTTCTATCCCAGGGTTCAAGTTTTGGCTAGAACCCTGGTGATTTGGTGCACACTTCAATATGAACACTTTAAATGAAACCGCTGCGGCTGATGAATCGTTGGATACTGCGTTTCTCTCGAGCCCCCAATGTGCTGCC…
ZAM	38	20	4.99625	SO		266.043	421.6	315.817	AGTTACCGACCCATCGGTACCATACACCACCCCTCCCTCTAAGCCACCACGCCTACACAAGTAGAAGACATCGAACCGGGAAGCTTTGCGATACAAAGTTGCAGCATAAACATCAACAACGGGTCAGACGCCGACATCCGCCCAAAATGCTGACACCACATCCTTTTCGCTCAGACAGAACAACGCATACAATTCCATATACATACGTATAAACATACTCATACTTTCTGCTGTGTCAGATACTTTATTTCTAAGAACTTTAACATTGTAATACATACACACATATTCACTGTTAGCCCATTTAAGACGAAGAATAAAGACGACCACAGTCGAGTGCAAGCAGCAAACACTTGTAGACGTACATAATCTCCGATCAAAATTCTCCCAAGACGACCGTGG…
