# Supplementary material for: The Drosophila ZAD zinc finger protein Kipferl guides Rhino to piRNA clusters
Source: eLife. 2022 Oct 4;11:e80067. doi: 10.7554/eLife.80067 (PMC9531945; doi:10.7554/eLife.80067)
Supplement: Supplementary file 1. [file elife-80067-supp1.xlsx]

## Sheet: Sheet1
chr	start	end	compartment
2L	0	22115000	euchromatin
2L	22115001	23513712	heterochromatin
2R	0	5812495	heterochromatin
2R	5812496	25286936	euchromatin
3L	0	23006900	euchromatin
3L	23006901	28110227	heterochromatin
3R	0	4174279	heterochromatin
3R	4174280	32079331	euchromatin
4	0	1348131	heterochromatin
X	0	21510000	euchromatin
X	21510001	23542271	heterochromatin
