# Supplementary material for: The Drosophila ZAD zinc finger protein Kipferl guides Rhino to piRNA clusters
Source: eLife. 2022 Oct 4;11:e80067. doi: 10.7554/eLife.80067 (PMC9531945; doi:10.7554/eLife.80067)
Supplement: Supplementary file 2. [file elife-80067-supp2.xlsx]

## Sheet: Sheet1
gene name	nr of in frame colonies
Del	83
Kap-alpha3	19
CG2678	12
E(bx)	9
Nelf-A	5
Br140	3
msn varB	3
CG9114	2
CrebB	2
ttk	2
mtRNApol	2
RpL22	2
Mrtf	1
CG2662	1
CG43333	1
CG44774	1
CG5098	1
CG7922	1
CG8388	1
CG9114	1
Cfp1	1
GATAd	1
HP1c	1
Nup98-96	1
Taf1	1
msn varA	1
