# Supplementary material for: The Drosophila ZAD zinc finger protein Kipferl guides Rhino to piRNA clusters
Source: eLife. 2022 Oct 4;11:e80067. doi: 10.7554/eLife.80067 (PMC9531945; doi:10.7554/eLife.80067)
Supplement: Supplementary file 3. [file elife-80067-supp3.xlsx]

## Sheet: Sheet1
Probe set target:	Cluster38C	Cluster42AB	diver	3S18	HMS-Beagle	Max-Element	Rsp	1.688
Probe set name:	38c_as1	cluster42AB_ult	diverORFCal59	3S18BelORF2k590	HMSbeagle1GAG	max_ORF1.5kb	Rsp	1point688
Source:	this study	Andersen et al. 2017	Senti et al 2015	Senti et al 2015	this study	Senti et al 2015	Wei et al 2021	Wei et al 2021
probe1	ttatatagcggcttggcctg	ataaaaggggaaaccctcgc	ccagttgatcaaatttcgac	ggctcgaattggaagcaatc	gctgatggtcttattatatt	tttttcttgtctccctctag	ataaaaggggaaaccctcgc	Cy5ttttccaaatttcggtcatcaaataatcat
probe2	agcttcgaaaggctgtagtc	catcaagcgctacattatat	atgcggtcagtttgaactcg	tgaaatcgttggcaatccgt	ccggtctttcgtttgaacta	cttttgttcttttccaggtg	catcaagcgctacattatat
probe3	aactgccggctgaactgaag	caccgtcctatattcgactt	gaacaagcgcttcaaagact	ccggcaaggtacgattttaa	caggtcgtgtctttctgagg	agtggatatcggagattgcg	caccgtcctatattcgactt
probe4	ttaaggggctcacaacagtc	acggagaaacggacggatct	actcgagtcttttttcacat	ttcccgatagttgtcattag	ctgttcgacactcatgtcta	ttttgaccctgggactaacg	acggagaaacggacggatct
probe5	aatatcacgacatccctagt	aaaatttttccgaagccttt	aatatatttccgttttccgc	ttgttatatcgctgttccag	gagtattgttgttcatttgt	aaacctttggtttcggagtg	aaaatttttccgaagccttt
probe6	gtttcaagtcagatgttcag	gagtgccggaataagacgta	cgtcgatttgattcaaacgt	ctcggaaggctcatgaaact	aattctgctggatttccaga	tgtcttcgaactggtcgatg	gagtgccggaataagacgta
probe7	ctcaaatcctttacggaggg	atggaataagctcagcttta	gcgcctgatgaaattctttg	gaataacttcgtctgcacca	cacatcagcacttccaacaa	gggaaatgaccaacctagga	atggaataagctcagcttta
probe8	agatgaaccttcctagttcc	ggttgtatctgaattttcct	gccatgcatataagtgtgtg	cttcgcaattaagagctcgt	tttggtattccaaggtagtt	gaagactcactagacgctcg	ggttgtatctgaattttcct
probe9	cctggtctccacttcaaaat	aatcaggcaattttccactg	atacacactttcttcgtagt	tgaaaattagccagggatcc	tggccttgaaccaaagttga	actctcggattttctcgata	aatcaggcaattttccactg
probe10	aaccggcgtttgacaaagtc	gttttggctgagcagattta	ggctgattgtattttgttgc	cgggtatcgctatctaattt	gcgacagatttttgtagacg	tttgtggtagagcgtgtgac	gttttggctgagcagattta
probe11	aatactgctgcgccataatg	agtatgagggcataatgatt	taaacttccatgcccaggtc	ctttttcctcggattctgcg	tgcagccgactttatttaga	ctgttcagaggatgccattc	agtatgagggcataatgatt
probe12	cttgttaagcgcatactgga	atccagtcatcattatacct	cttttcttcggccacgaaac	caagaatcggttgatggtca	acaaagtgctcggattctcg	tatgcaacgctgcgtttgcg	atccagtcatcattatacct
probe13	gttgccagtactggaagatg	cacctaggaatcacgaaggt	ctgtgcctggataaattcgt	cgcagcgtgatgtgagaaat	ctggctcttttattgccaaa	cgatcgctgacggcgatgaa	cacctaggaatcacgaaggt
probe14	gcgaaagagtatttttgcgc	actttgtgaaaaggcaacct	gagttagctgattcgttgtg	tcgagcttgggttgatcgag	gcatggtttgacctgaaagt	atcttcgcttcgaaaaggct	actttgtgaaaaggcaacct
probe15	gctggaaatcctctccaaaa	ccaaagttagcaacacttcg	ttcctctacatgtgttgtta	aacagttggtgattctgctg	tgaaactcgactgttgaccc	gagaggcttgatctggagtg	ccaaagttagcaacacttcg
probe16	agccaatctaggcttttatc	tgaaagatgacccaaaacca	taattttggcagtggtatcc	tgcgatgaattgaggacact	atgggatgtcgtggagggac	acttgtaacgtgtgtaggga	tgaaagatgacccaaaacca
probe17	ggaaacgcgccaaagtgata	tggaggaaggaagacaccga	gttgccagagaatttcggaa	ctcggcgagatgcaatgtcg	ggaatggctggcctaaatat	cataaggctcgcacctgttg	tggaggaaggaagacaccga
probe18	ctagggtacttcccgaaaca	aaacgacggtgcactggatc	gcatcatgaaaacttggcca	cgggctgaggcaattgaaac	ttagacacgtgttgccttgg	gtactctctttccactttgt	aaacgacggtgcactggatc
probe19	tcatcgattttgttcccaat	atagcagtgccaataatgat	cttatccagacgctcattat	tacagttgcccaccatatga	aatgaacggtgcattaccga	ccattaggtcagagcatgtt	atagcagtgccaataatgat
probe20	taaggaacggcaagtctcca	tggatagcagtgccaataat	ctactggtaatgcttccttt	cggcagatccgacaagtatg	gtttggtcgcaaagggacgg	gtgtctagggatccttcttg	tggatagcagtgccaataat
probe21	gcagatatactctccatttt	gaacgatgtggcattgatgt	cgatttggcgaatgtcgttg	tgttgccattttgaattggc	aatgtttcgcgtctgtacac	tatttggcctggagaatagg	gaacgatgtggcattgatgt
probe22	acgagctttattgcaagacc	tcaatcggaatgactgtggt	acttcatagtttgcttcagt	gtcaacacttgctgtgtcaa	cgagtgtggtctattcatat	gtatactgagtagcagtagt	tcaatcggaatgactgtggt
probe23	gccttatcaacaacaaaccc	accattaatttctatgccag	gttgtagaagtgtggtccaa	atgtgagactgctggtcgat	gtagttcttttgtcgtttgt	caatttgtgctgcacatgac	accattaatttctatgccag
probe24	catcaccatctggaatgcaa	aaaaggaccaattagcgcga	ctggcgaacacaattcgtgg	gttgattgtggccaattgta	tctcatgttcactgtttgga	gttgctctgtcgattgtttc	aaaaggaccaattagcgcga
probe25	agaccctatgcaaacggaac	gccaagaagcgataaagcga	gttgtagagcatgttcatgt	caagcgatgaccttctcgag	gacccagttacttcaatact	gaaattagcggctgagaggg	gccaagaagcgataaagcga
probe26	tggagaaggcgatgagtcaa	ttacacggactggaactctt	tttctttcgaaagattcggt	tgcgtaaagttgttttccgc	gctgtttatattgttctggg	tgtcgcatggaggtaagcgg	ttacacggactggaactctt
probe27	gaagccatgttcgaaagtat	aggggatgtattttgcagtg	atagaccgtatgtcagcaga	ccggaatattctccagagta	gtccatcacagtattcattt	tagtcgccatcgaagacttc	aggggatgtattttgcagtg
probe28	ggaaacaataatgggcagga	aaacatagtcaaaccccacc	atgcagacgttgactgtact	gcaacagagtctgagaacca	tcgctgtccaaattgtctat	tgaataggtcccggaaagtg	aaacatagtcaaaccccacc
probe29	cacaggccaatgctgacaac	tcatttagcggcctaaaata	cttgacggtattgcaagcgg	ctgcaggttgtagtgtttcc	aaatgcaacacgtggtctcg	cctggggttgtttacgtaaa	tcatttagcggcctaaaata
probe30	aattgatgggattcatgcca	actttttgttttagtagccg	gtcaaccaaaaatctcctcc	ccaaggttattgtagatcca	ttttattagagcctgtgtca	aggtggaatagcttctcgac	actttttgttttagtagccg
probe31	ttagttatgccaacgcaacc	ggacgtcaagatataccgtt	gagtgtctttgggtagtttg	acgcctattcgctgaacaaa	accaaattgggctggatgta	ttcgccacttgttttggtaa	ggacgtcaagatataccgtt
probe32	cagcagcaaggttacttcta	ttcctccaagctgaaggaaa	cagatgatgctcccaagctg	aatagaaatccgtgcgtgcg	gttatttggtatcgcgttcg	ttcgtgagaggagatttcgc	ttcctccaagctgaaggaaa
probe33	catgttcgctccaaagcagg	aaatttcggactagccgatg	gaaggaacgtcaatcttgct	cagcttgatatgtgcgcgtc	gagtatcagctatgtaaggc	ccaagccgaagcaaaaccat	aaatttcggactagccgatg
probe34	caccgcatataagaaggtca	gcaacaagccatatgtgttg	gaggaactgttgcagatctt	tttggcccgaatgacgagag	gatatttttacatcaccgcc	tttggaaccgatctcgaagc	gcaacaagccatatgtgttg
probe35	atgcagcctcatataaagtt	aagagtgcagtgcttagaca	cgtctaacgtaacaagtcga	atgaacgagaccaattcgac	tcgaaaaggcttgctctttt	ggctgttgactaaaagtcgc	aagagtgcagtgcttagaca
probe36	tgcttgcaaagcgaaggact	taaatgctggtgacgtcagc	cacgcgttacggctttcaat	gaagtgatgacgtcagcgag	gtcttcagcgttggtaacaa	gtagctcttttagagcatga	taaatgctggtgacgtcagc
probe37	aaataataatatgccggccc	tcagagaaccgccaaagtag	catttgactgtttcatgccg	gaggtgtcaataacttgggc	ttcattgtgtctttgccaag	ttaaacacccctgaatcgtg	tcagagaaccgccaaagtag
probe38	tgcgaagacggtcacccaac	gttttagttacggagatggc	cgtttagtaccgtctgaagt	agatttgcctccacgtagag	aaatcaatttgcgctcccat	gatacctgggaatgctctag	gttttagttacggagatggc
probe39	cctagatcacaggtgtgtca	ggcacataaaagcacagtgc	atagcaagcggacgcggaag	ttgggtctgccaaaggaagc	cagtgtcatggttaggttct	gatacaatcccagttttctg	ggcacataaaagcacagtgc
probe40	gacatacccaacggtactgc	ctcatcgtttcaaatgtggt	gtatgtgtaagttgccacaa	attgctccaggtgtgcagaa	agaacaactcttttcccgtt	gtttgctcgcgcaaaggaaa	ctcatcgtttcaaatgtggt
probe41	tgctatctgtgtcagggatt	gaagccaaacttattcgcga	agaaattgcggacatcttcg	gatccgatccaacaatgaca	agcctcgaactgtttttctt	atctcggatttggcagttag	gaagccaaacttattcgcga
probe42	aaagtttaatgacttgccgc	cacaaaggcattcgtcgcag	ccgttggtagcaatccattg	ctcctgtgtatagagaccaa	attctcggactaattgtgct	attcatttcttcccaagctg	cacaaaggcattcgtcgcag
probe43	ctcagtggtgaccatttacc	gttaaaataggcgcgaagcg	gagacacaattttgccttgc	tcgttaccaaagtgtttccg	caatatcattctctgttcca	gatacctttcgctcaggaag	gttaaaataggcgcgaagcg
probe44	ataaagttacgcgactctcc	gccttctttcaatgttttca	ttgcttgtgtgtgcgatttt	cagtattgagagcgatagga	gacctggatacgaatcaatt	agtcggtttcatatcttcga	gccttctttcaatgttttca
probe45	gccaagaacaacaaggaggc	ctatagaaacccgggatcag	agacaattcttgttgctggg	taagagcctgcaagaatcca	cttacacttgttgtgtaggt	ttgaagccttttgggaaccg	ctatagaaacccgggatcag
probe46	attttttgccaatctcgagc	cagtttgaacatttcgtggt	acatcgtgtgatgacgttga	agggtgatcatcgaatgcag	cgatatagttcggattgctg	tgctgacctttgtctcgaag	cagtttgaacatttcgtggt
probe47	gtaccaaaaagcctctcaac	tccttattgttgctgtcaag	ttggctgtgttgctggaaaa	cgtgatgagtaaccgcagaa	attttgagtatattggcgta	atgtcacaccctttctgttt	tccttattgttgctgtcaag
probe48	agagacttctacaaccccac	atagagctcaacgaggagct	gatgtcgaggagggtatcag	aacgaaccatcgtgtctagg	aatttgtttgtgtacctcgt	cggatggttctccttagaac	atagagctcaacgaggagct
probe49				AAGGTTGGGTCGAGGAGATG
probe50				AAGTGCATTCGGGATCAAGC
probe51				AAGATGACTTTCCAGCCATA
probe52				GAGCAAGATGGGGAAGTTGT
probe53				ATTGTCCCGGCAAAAGGAAA
probe54				CAGTACGTTAGATCTGTCGC
probe55				ATCCGTACCGTAGCGAAAAT
probe56				TCTCGCCTACAAAGTCGTAA
probe57				GGCATATCAGCAGCAAAAGC
probe58				CCCAGTGCATTGAGTTATAT
probe59				TACTGGTGGAGTGACTCATT
probe60				GAACACGAAACGAAAGCCCC
probe61				ATGGATAGGCTCAGAGCAAC
probe62				GGAGTCCATAATTGGACACG
probe63				GGATGAAGACATGCTGGCAT
probe64				CCGGTATGGGACATTAGGAA
probe65				CCAAACAGCGAAGATGTGCG
probe66				TGACAGAGGTACGTCTTTCA
probe67				CGGACTCAAACCGACGTTTA
probe68				AACCTGCTAGATCTCGTATT
probe69				GGGGCAGTCGAATTTCTAAC
probe70				CAGACCAACAGTCATCGGAG
probe71				CTGGTTAACCATGCAAGTGG
probe72				TCACTTCTACAGCTGCTATG
probe73				GCATACGCCAACATTAGAGG
probe74				AGTGGGAAACCGTACCAATG
probe75				GGCCATTAAATGTACATCCA
probe76				TAACTCAGGAGTGCTACTCG
probe77				CAAACAGCGAAGGAGCGCAA
probe78				AGCCGTCATAATGATGCTAG
probe79				CACCTACAAAGCTAACACCA
probe80				TGGACAAGAACCATGCGACG
probe81				GAGCATGGGCATAAGGCAAA
probe82				AACCAGAGGATGTAAGAGGC
probe83				CCAAGGACGCTAACAAGGAC
probe84				AGACAGGCATTACCGAATGT
probe85				AAGGAGTACTGCCACACAGA
probe86				AGGGTATCAACAAGAAGCCC
probe87				TATAAGAGGAGTCGGAACCC
probe88				TGATAGCATTGCCAACCTTT
probe89				CAGATCAGCTGCATCAGATA
probe90				CAAATCCACACTGGGGTTTG
probe91				ATGGACTCGACATCAACCAG
probe92				GGTGGAATGGTCAGCAATGA
probe93				TTTCGTTACGACGGGAACGA
probe94				GAAACAGGTGCGAGAGTGGA
probe95				AGAAATCGGACAGGAACGCC
probe96				GAAAGTCACCGGCGTAGAAG
