# Supplementary material for: The Drosophila ZAD zinc finger protein Kipferl guides Rhino to piRNA clusters
Source: eLife. 2022 Oct 4;11:e80067. doi: 10.7554/eLife.80067 (PMC9531945; doi:10.7554/eLife.80067)
Supplement: Supplementary file 4. [file elife-80067-supp4.xlsx]

## Sheet: Sheet1
TE name	sequence used in this study
1360	CAAAGACACTAGAATAACAAGATGCGTAACGCCATACGATTTTTTGGCACACGATTTTTTTGCCGTGGCTCTAGAGGTGGCTCCAGGCTCTCTCGAATTTTTGTTAGAGAGCGAGAGAGCGAAGAGCGCTACAGCGAACAGCTCTTTTCTACGCATACAGTGATAGCAGACAACTTTATGTGTGCACACGTATGCTCATGCATTGTAAATTTGACAAAATATGCCCTTCACCGTAGAAGTTCTTAGACTTTAAATCTATATTATTTTTGATCAATTGGCATCATGCGAAAAATTCTTGTTTGCATTGCCTTAACGTTATTATTATTTGAAAACAGATTAGAAATAGCCAAATCCATGTACATATCATAACAAAATAAATTTCAAAAATTACTTTATATT…
1731	TGTTGAATATAGGCAATGCCCACATGTGTGTTGAATATAGGCAATTTCCACATGTGCATATGTAATTTTGTATGAGAACATACATACATACACATGAACTGTATGTATGTATATATATTAGCAAATAAGCAGCCGCATGAAGGTGGCATTTTTATGTGTATCAGTTTCAGTTTCAAATAAAACTTCTTCGTGTTCGGACACGCGGCTCAAGACTTTTTATTTCGCGTTTACTCTTTCAGCCTTTGCTCTCAATTCGCTGAGTTTGGGTGAAGATTAGGATCTTCCCATTATGATTGTCAGTGTTCCACACTTGGAGCACCTTTTCAATAAACAACAGGTTAATGGGCCCAGCGCCCTAGGAGCTGCCTAAAGGAGAAACGTGTAGTGAAACTCAGGAGT…
17.6	AGTGACATATTCACATACAAAACCACATAACATAGAGTAAACATATTGAAAAGCCGCATACGTAAACAATAAGTGACCACCATGCTAATGTGGATCAAATAACAAAAATATCCACTCTGCATTTTGACACCCCCATACTGTATGCCATCTGCGCAGTATGCATTCTAATAAACAAATTCTTTGACAGCGGCACTTAGCCATTCTTGTAAACAAATCTTAAAGTCTGCCTGCTCTCTCTGAGGCTTCTCCTCCACTTAAGAATCCAAGAGCAATGCTCTCCCAAAAACACTAACATATTCTTTAAGCAAGCACAGAGGCTTCTCCTCATTTTCACTTTCATTTGATTTTCAGTCTTAAGCTGAACGTTAATCAATAAACAACACAATCGATACCGAAATT…
297	AGTGACGTATTTGGGTGGTCCAAACCAGCCACTTCCATTATTTCAAAGAAATCAGTAATGCACTCTAGTAATTTTCCATAACTGTATCCCAGCTGCGCAGACTCGTTTATCTTTTGCAGCGCAGCGTTCTTTGTAAACATCCTAAAGACCTGCCTAAGCAGATTTGACTGCCCTCTTTCAACGCTACCTAATCTTAAGAACCCAAGAGCGAGGCTCTCCCGAAATACAAATATTGTTCAAATACTGAGGCTTCTCCTCAATCCAATTTGCATTTGATTTTTAGTCTTAAGCTGAGATCCAAAGAATAAAGTCGTGAAACTATTTCTCCTAAAAACTATTTTTTATTTCTTGGCGTTGTCCTTAGTCAACTGACGGGACATTAGTTCGACTCATAAATAA…
3S18	TGTTTGGGAACGAGACACCCTGTATACGCGAACAAGTCACCCTTTATCTTTATTTACATTCTTATTTGTCTGCAGCTTCATCGGAGCTTATCAGCGGAATCAATGTAAGCATCGCACCGCTGTAATTGTCCGCGAGCTTGCCCAGTACTTTTCCAAACTTCTAACTCCCTTCTAACTGTAACTTGTTTACGTCTTATGCTAGACTAATCGTATGGCGTGATTACAGCCAAAGCTGAAGTCAGTCACAATTTTGATCTGCGAGAAAACGTACGCATCGGTGTCGAAATAATTAATATTAAGTGTCTGAACTTAACCAATAAATGAAAATTAACAGTAACACTGGCGGTTTTATTTATAAACATAAAAATTGGTCCTTCGAGCCGGATAACCGGAAGTGCG…
412	TGTAGTATGTGCCTATGCAATATTAAGAACAATTAAATAAAATAGCATATTAACTTATGGCAGCACTTTGTTGCTATGTTTATGTTTATGTTTATGCACGCAGTTAGGCCAGGGCGGATGTAACATGATCACCCACTCGAAGGCCACAAAGTATAAGTGCATTGCCCAATCGAAGGCAAAAAGTATAAGTGCATGGTCAGCATTCACACGCCGACCAAATACATATTACATACGTACATACATATCTCGCTCTCCCGATAAGCCTAGATATATAAGATATACATAAGAACGCCGCTCCGCTGCTGGCGTACCCGGCAGCGCAGCTACGCGGATTAGCCTAAGTCCAAATATATAAAAAACTGTAAAATCGGAGAGACTCTGTAGACGTTGAGCTGACAG…
accord	AGTTACCATGCCCAGCATTAACCCCCCTCAACAACCACCTCCGCCTATGAAGCCCGCCCGGTAGGCGACATCAGCAAAGTGCCAACGCTGTATATATATATATTGATCACGAGCTACCATGCCAGCATAGCCTCGTCCCCCGCTACCTGAAACTCTGTTGCACCCGATGATGAAATCGGCATGAACACACACACACACACATATTCACACATACTGCGTGGTGGCGACGCTCTCGACGTTGAAATTAACATGAACCTACACACACACATACACACTGCGTAATCGCGACGTCCTCGTCTAGACTCGCTATCTAGAACTAACGGGATCAAAAGCACTGCTGCTTGCCCGTGCGTATACATTAAGAATAAAGCTTTCATCATTCTTGATCTTGACACCAAA…
accord2_new	AGTTAACATACCCCCTCTCTCGGTCTACCCAGTACTGCAACTGAGAGCCGAGCGAAAGTTCAACGAAGATCGCCAATACGAACTCTGACGAAGATATTTGGGAGATACATTATACATATTTGTAATAAAGAATTCATTATCATTCTCATTTCACACCTCAAACTACTCAGTCGTTTTTTTGGAAGCTTTCCTCCCTCGGCCACGGGATTGTAACTGGCGCAGCCGGTCAACGGACAAGGGATTAACAATGCCCACTACGCTTAAAGAGGTATTGAACATGTGACGGCAGTGGTTGTGGGGATTTTATTAGTGAGTGGTGAAATAGAAAGGAATTGGATAAAGCGTATTGAAACATAATAACGTGCAAGTGCAAGTAAAACAAAGGAAACAAACGAAATC…
baggins	GGCCGCCACGCCAGTAGGTATCACAAGGGGATCAACGCGCCACCAACGGTGGTACGCGCCGTAATTGTGACACACTACTGGAAGTGCAACTACACTCTCCACGCGAGGGCGGCTGGAAACAGGCTCTTAGTTAGGTCATGTCTCTGCTAAGAGTGCTGGCTAATCGTAGTTGGGCTGGAGCTGGTAACTCTCAAAAATTTCCACATCTCCGGGCCGGACTAAGGTGTCATTCGACCCGTGCCGAGAGTCTGCCAGGCTGGGGGCCCGGGAAACAACTAGCCCAGTCGCTAACGGAGAGTCCGGGCAAGTGGCGTCCGCCCGGTCTGGTTAGCCTTACCCGGGTACTGCGGATCTCTGCCCGGGTGGACCGTTTATTTCTCTGCAACTCGTGGGAACCAT…
Bari1	ACAGTCATGGTCAAAATTATTTTCACAAAGTGCATTTTTGTGCATGGGTCACAAACAGTTGCTTGTGCAGCAAGTGGGGGGAGGTGAAATGCAAAAAAACTTTTGCTTTTGCAAATTCAAACCTATGCAGAGTCAGATGAAAGAAGAATTGAAAAAATAACTGTTCCTATGCGCAAGGAAGAGGCAAATGAAGAGATCTTTATCAGTTGTCAGAAGTATTTGCACACGGTTTCGTCGCATCACAATTATTTTCACAACGCAATTTCTTCTTCAGTGATTGGTTTAGAGTGACAAGTGCCGGTTTGTTTGCTTAAATACATTTAAATTATTGAATAAAAATTAGATTTAATCATTTTCCTATTACAGTTATTAAATAAAATGCCCAAAACAAAAGAGTTA…
blood	TGTAGTATGTGCATATATCGAGGGTACACTGTACCTATAAGTACACAGCAACACTTAGTTGCATTGCATAAATAAATGTCTCAAGTGAGCGTGATATAAGATCACCCATTTATGCTTTAAGCTAAGTCAGCATCCCCACGCTGGCCGCTGGCCATATATGCGCATAAGCTCTCTCTCTCTCTCTCTTATACATATATATATACGCTGCTCTTCTGCCGCTGTCGACGGCGGCGCAGTCGCAGTATTTAGGTAAGATTAGACACTCTGTAGAGGTTAAGCGGGCAGAACCGTTTCTGCTACTCGAAGAGATAAGAAGAAATAAAAAGGTGCCTGACGGCTGCACCCAACTGCAAGGAAAACACGTGTTCTCAATTGGTGGCATATATTGGTTTATTACAT…
BS	AAATCTGCATTCATAGAGATCGGTTGTGTCGCGCGTATGCAAAAGTGATCTATTTTGCTTTATTGTTGCAATTTCTTGGGTGCTTAAAATAGCACTCACCAGTACATTCGGGCGCTGCTTCGTGCGGTGTCGGCATCTGGCCAACAACAAAAAGCGTTAATCGAAGTGCGGTGTAGCTACGATACCTGCCCTTCGGGCAACTTATTCCCCTCACCCCGCGCAAAGCCGCTGAAGGGGGCAATAAAATCTATGCTTATCAGCAAAACTGATCCGTATTTGATCTGTTTTGTGGTCAGTTAAGCAAGCTATTTTGTAAATATTAAGAATTATTATTAAGACAATGGATGAGAACAATTCTGATGACACCCAGCTTTTAAATAAGCAGAGTAACCATAGAAC…
BS3	TATCAAAAGGCGATGTGCGCGGAAAGCGCCATTGGCCGATAACAGTGGTGCATGGTGCCGGACTTTTATAGAGCAAGCCGAAGTGTTTGCTGTTCACCTCGCGGAGCGATTCCAGCCTTTGAACCTCGCCAGTCCCCAGGATGTTGACGCGACTCACGACCAGCTGTCCCAAGCGCTCCAAATGGACTTGCCGATGCAACCGATCACTCCCAGCGAGATTGCTGACGTCATCGCCAAACAAAACCCCAAAAAAGCTCCAGGGCATGATACTACCTGCAACTCCACCCTAAGGACACTACCGAGATGTGCGATCCTCTACATTACGTTGTTATTCAACGCTATGGTGAGGCTGCAATACTTCCCTCCACAGTGGAAGCTCGGTATTATCTCCATGATTCA…
Burdock	AGTTAACACAATCACAAAACACCCGAAATATAGTCGTAAGCCTCAAGTGCTTTTCCCATCTATAGATCGAGCTTTACCTATAAGAAACTGTAACTTGTTAAGCTTTAGAGATAAGAACTCTTGCTATACTTAAGTCAGTCGATTTTGGAAGATTAGAAGCGTCGGTCATCGCCACGTACTTACTATTCGTCTCATTAAGTGCAGACCGCGCAAGCCTATTGTAATTAATAAACTTACGCTAATAAATATATGGAAAATCTACTAAAATGATAATTGGCGCCCAAACGGATATAAAAACCTACGATAACTGAATAATTATAAATAAATAACAAAAGGAGGATCCGGAGACAAAACCAGCGGCTTTGGCTAATTAACTCTAACCTAAGAAATAAAAATTTG…
Circe	ATAGAATAAGGCCAATAACATCTGGGCCTCATCTTCAATAGGTACACTTTTTTGTCCGCTTCTTAACCGTTTGGTTATCGTTTTTTTTTTAATCTACCGTATCTCTGTCTACAGTATTGTAGCTGTGACACTCTTGTTCATCTCAACACAAAACCCACGCCCATTTTCCCTGAGTATGCCGGTAAAAATAGTAGACAGAGTGTGTTGGGGTGGACAACGCTCTATGAGTGTGTTCGTTAGAGTTATAATTGGCGCCCAAACGTGGGACAGCCCGATGCCTGATTAGGCACTTGTCGTTTGACAACCGAGCTTCCCGTTAATAAACAATCCATCCACTCTTAGTTTCAGTTAGGTATTTCATATTCCGTCCTGGAATTTATGATATCTGGAGAGTCCCGG…
copia	TGTTGGAATATACTATTCAACCTACAAAAATAACGTTAAACAACACTACTTTATATTTGATATGAATGGCCACACCTTTTATGCCATAAAACATATTGTAAGAGAATACCACTCTTTTTATTCCTTCTTTCCTTCTTGTACGTTTTTTGCTGTGAGTAGGTCGTGGTGCTGGTGTTGCAGTTGAAATAACTTAAAATATAAATCATAAAACTCAAACATAAACTTGACTATTTATTTATTTATTAAGAAAGGAAATATAAATTATAAATTACAACAGGTTATGGGCCCAGTCCATGCCTAATAAACAATTAAATTGTGAATTAAAGATTGTGAAAATAAATTGTGAAATAGCATTTTTTCACATTCTTGTGAAATAGCTTTTTTTTTCACATTCTTGTG…
Copia1	TGTTGAAATTACGTTATAATTTAAATAAGCTTTATATGTTTTGATCTGGCAACGCTCAATTATAGCTTAAGAAGTCATTGTGAAATTCCCATTACTCAGTTTCAATTAAACCGTCAACTACACCACTACGTTCCTGTGTTTATTTGCTCGGTCGGTCTAGAAGCACATAACGGTTGTCCTGATCGTACGGTAAATCACTAACAGTTGGTTATGGGCCTTCAGCAAGCTAAGTTTTCGGTTTGAATAATTCAAAGTAATTAAATGGACTAACACGCGTCCGGTTGAAACTCGAAATAAATAAAAAAACTAATTTGCGGAATTCGACAAAATGAGTGTGTCAATTCAAATAGAAAAATTAGGCGACGACAATTACGACGTATGGAGCATTTTAATGCGTAG…
Cr1a	TTGGCTTTCAAAGCGAACGGTCGTTTTTTTTTGCGCCCCGATTTTTATTTTGTGTTTGCCAAACCAGCCGTGGTTTTTAATAATCTTCTTTAATTATCATATATTTTAAACATAATTATTAAAGATCCGTTCGCTTCGCGAGTGATTCTTTGTGATTTGTGCAGTAGTTTAAACAAATATACAAAGTATTTTGCATTTTTCGTCTTTGTGTTTTGTTTACTCTCCCTTTTGTGCGTTGTTCGCAGTGCTGTTTGGTGTTGTTTTTTGCATGCACATAAACTGCACTTTTCGCTCTCACTCTCTCGCTCTTTCGCTCTCCCACACAAAATCTAAATTTCTCAGCGTGCAGACTGCTCTCGTGCGGTTCTTTTAACAGCTCGCTTGAAAGTTTTGATCTTG…
diver	TGTACGGATTATGAGCGGAGTCACCCGGTGCTTCAGCTGTCTTAACAGCGGATTAACATTTTATATATCGATGCTAATTGAACTGAACTGTATTCTTTCTTTCGCTCTTGTAATTTTGCGGTCATAGCGATCAGACGTGATTTTTGTATATGAAGAAATAAATGAAGTTAAATAGTGTATATATGATTCTTATTTGCGAACCCCATTACAATGATGTCAAAGCAGTGAGGCATCACAACTATTCATTGGTGGCCCATGAGGGGAACCTTGCTCATAAGAATCATAATTAATAATTGCTAAAAGCTGTTTGGCAATTTTATCTTCGTGGTCGGCTTCATCCAGATAAATCACCGTGCCTACGTTTTCTATCGCGCTCGCTCTCATCACGACAGAGCAGTA…
diver2	TGTTGGGTCATGCAGCCGCCAAAACTGTGCAGTAGACTAATCTCATACTCTTTAATATTGTAAGCCGAAGTAGTCAGTGGTAGCAGTTGCGATGCCCATAGTGCAAACCGCTGTTCTCGCACGCATTTATCTGTACGGCGCTCATTCCTTGTTCTTTTTGTTATCTACCTACGTTAAGCTTGGGCGCTGCATTTCGGCTGTCTGTCCCGCCAATTGCCACTTCTTCGTCTGTCGGAAGAGACTAAACTTGTGCATTCGATATAGCTCTTTGTCGGCCCTAGCTGCTGTAAACAATTCGCAAAATAAACAGTATCGTAAAATAAACAAACTTTCTTCGGCTATTTATTATTCGCAACAGCTATTGAAAAAGCTCAATAGCTAAACATTGGTGACCCCGAC…
Dm88	TGTTGAAAATATGTATGTAATATGTATGTATATATAATAATATGTAATAAAGTCAATGCACTGTGTCTCCCTCTTTTGGTCGCGGTAACCAAAAGCTTTTTTCTCTTATTGTGTTATCCTCTTTAGCGTGTAATTTGGCTGCCTGCGTGCAGTAACATTGTACTCTAGATCAGTCACAATAAATACTTGAAACGAATAGGTTATGGGCCCAGCCCACGCGGACATAAAAGTGAATAGTTCTAAACGAATTAGAATATTCGGCATCTTTAAATATTGTGATTCAGGGATTTAATACGAAAAACTTATCGAAGTGAAAATGAGTTCATCAATAAACCAAATAGAAAAACTTGATGATGAAAACTACAGTGCGTGGGCTGTACAAATGAAGAGTGTCTTAAT…
Doc	GACATTCGGCATTCCACAGTCTTCGGGTGGAGACGTGTTTCTTTCAAGCTACGAATAGCAAGTTCTAAAAACTACAACAGTATAGTGAAAGTTAAACACAAAGTGTAAAGTGCAGTTTGCACAACTAACAATTATTGACTATAGTAATTATTTACTAAAATAAATAATTATTCCATATTGTTCTGGTAATTGTTATATGTGGACTTAGAACAATGAATCAAAACGACATACGTTCTCAGCGACAATGTGAACAAGACGAGCGCCGGCTCTCTTTACAACGCAACAATGCATACTTTTCTTTCGTCTCACCGCAAATCGGTGATCGAGCACCCTCACCTTCAACTAACTCGAAACTTTTGCCCTCAGCGAACGACAGACCGCGTTCTTGCTCTCCCTCTC…
Doc3.element	TGGCATTTCAAGTGAACAGACGTGTTTTCATCGAGCTCCGTATAAAATCACTTGATTTTAGTGAAGTAAATAGTTAATAACATAAAATAAATAAATAAATCGAAAGCGAAAGAGACGCTATTGGCAATGTTAAATTGCTATACTACAAAATTTTCTGTGTGTGGAATAATAAAGTAAAACTAAAAAACAAATAGACAACGAACGAATCGATCGTTCTAAAATGAGCCAACGCGAATTGCGCGCTCAGCGGCAAAAAGAGCAAGACGAGCGCCGACTCTCTTCGCAGCGGAACAATGCATACTTCACCGTCGTGTCTGACGCCCGCGAGTGCCAAATCATCCACCCGGTCAATGACCTAGCACCTGCAGAATGCAAACGATCGCGGTCTTGCTCACCAAT…
Dsim_ninja	TGTCGCGGATCGAATATTGTTATCGATAGGCTAGTATTTTGAGAAGTCCGAATGTGGACGGATTTGTAAGCCCATATGTGTCTGGGCACATTGTTTTCGCCATTGTAAATTGCCGGGAAAATTTAGCTTTTCATTGTCGTGCAAGAGTTGGAGGACACACTGCGGTGAGCTAATAAGTTAAGTTAGTTACAATTGTAAAACATTAATTCTTCCAGAATAAAACGCTTTCTACTACCACGAATTAGTCTGCCCTTTCTTTCGGGAACCAATGCGTGGAGTAGCCGTTTAAGGCAACTCCTTGTGACGCACGACGACAACTTTTTATTCGCAGTCCTAGGCGACTGCAGGGGCAACTTGCGCTGGAATGACGGTTTAGACGGCCAGCTAGAGAGTTGCCGG…
F.element	AATCAATTAATCAATTCGATCGCCGACGTGTGAAGACGTTTTTATCGTGCTCCGCACAAAATCGGTTGTTTTGAGTGAAGTGAACGCCAAATAAAATAAACTAAATAAAAAATCTGAAAGCGAAAGAGACGCTCTATGCGATGCAAGATCGCTTAAATACATAGTGAATTGTTATCTTAAATAATAAAACTATGAGTCAGAATGACACTCGCGCCCAGCGTCAGCGCGAGCATGACGAACGCCGACTCTCAATTCAGCGCAACAACGCGTACTTCTCCTACGTCTCACCGACAATCCCAAACGCAGACATCGAGCGGTCAATAACCCATAGCCCAGGAAACCTTCTTCTACCAACAAATCAAGAAAGAGCGCGCTCCTGCTCTCCCGCTCTATTGGCTC…
flea	TGTAACATGAGTAAGGCTGAAGGCTGGCAACAACCCGGTTGGCAGCGCTGTTGAGCAGCAACATGATTGTCGGAAATCCAAGTTATCGACAATCAGTCATCGAAGGACGATCGCAGGCAGCAGTAGAGGCGAGTGGAAGTCAGCGTTGCAGTCAGTCGAGTTCTCAGCAGCAGTCGTTCGGTCCACAAACTAAGAAATACTTTATATAATTACCGCATTTAGAATTAAACTAATAATTAAATTAATAATAAACAATAATAATAAACAATCTTACATGGGGGCTCGTCCAGTCCTAAATCGGTTATATGAAGGTGCAGTTGTTTAAAGAAAAAAGACATTGTTGTGTGCGTGGGTATAGTCTTTAAAACGTTGTAAAGTTGTGGCTATATCTATTGCATT…
G2	CGAAGACCGGCCACCCCTTTCAGCAAACCCTGCACCATCAAGCTCCCAAGTATCTCCAATATGAGCTACAGAGATGCGCTCATGTCTACCCAAGTGCCTCAGCAAACCAATCCCAACCAAACCCGTCAAACCCCACCTGAATCTCCGCAACCCAGTAACATGGAACAAATGTTTGCTCGCTTCGAAGGAATGGTCGAAAGGATGATGGAGAAGATGTTCTCGCAAATGACGCAGCTTGTTGCTTCCATCCTCAACGCAAAAGTATGCAAAGCCTAAAAATAGTTATTTGGAATGCTAATGGCCTGCAGAGGAGCAGAGCCGAGGTGGAACACCTCCTAAAAACAGATGCCATCGATGTACTACTGGTATCAGAAACCCACTTTTGTCCCAGATCCCATT…
G4	CGAAGTTCAAAGAAAAAAGAATTCCCTGGACAATTCATCAAGCACCAGCGCAAATAAATTCGCTCTCTTAAGCGACGGATTGCCCGACAAAACAGGAAACAAATATAACAAAAACGAAGATCTCGAAATGGTAAATGAAGACAGCGCAACTGATTCTGCTAAGCCCCCACCTATCATTCTGTCTGACGTCAATGATATAAGTGAAATGCTAGCCTATCTTAATTCTAAAATTAAAAGAGAACTTTTTTATTATAAGACTCAACGTTATGGACATGTAAGAGTAATGGTTAAAAGTATTGAAGAATTCAGAAAATTAGTCAAAACACTTAATAATGATTGTGTGCAGTACCACACATACCAGCTTAAGGATGACAGAGCATTTAGAGTTGTTATTAAGAA…
G5	CGAAGTTCAAAGAAAAAAGAATTCCCTGGACAATTCATCAAGCACCAGCGCAAATAAATTCGCTCTCTTAAGCGACGGATTGCCCGACAAAACAGGAAACAAATATAACAAAAACGAAGATCTCGAAATGGTAAATGAAGACAGCGCAACTGATTCTGCTAAGCCCCCACCTATCATTCTGTCTGACGTCAATGATATAAGTGAAATGCTAGCCTATCTTAATTCTAAAATTAAAAGAGAACTTTTTTATTATAAGACTCAACGTTATGGACATGTAAGAGTAATGGTTAAAAGTATTGAAGAATTCAGAAAATTAGTCAAAACACTTAATAATGATTGTGTGCAGTACCACACATACCAGCTTAAGGATGACAGAGCATTTAGAGTTGTTATTAAGAA…
G5A	CCTCTGCATTTAAAAATGGGCCCCCTTAGGATACCAACTTGGAATTCAATTGGGGCCTCCTTGAAGACCAATGAGTTCCTCGCTCTTATTGAGCTTCACGACATAGACATCCTCCTGTTGTCAGAAGTCCACTTCTCCTCCCGGTCCAACTTCAGGGTCAATGGCTTTACCCTACATACTGCCAACCATCCGGATGACAGCCAACACGGAGGCGCGGCGATCCTTGTTGGATCAAATATCTCTCATCAACCATTCGCCACTCTATCGCAAAATCATATCCAAGCAGTAGTTATTCAGCTGACTGCAAGCAGAGGAAACTTTAATGTTGCCTCAGTATACTGCCCTCCGACTCTTAGATGGACAGATGCTATTGTTGGGCAGTTCATCACACAATTTGGC…
G6	CAGTCGCGATCGAACACTCGACGAGTGCAGACGTGCCTGCGGATCGACAGCAAATTGTTCACAGTTTTAAGTCCCGTTACTTGTGCCCAGCCACTTCGCGTCGCGTGATCTTGTCGCGCGTTTTGATTGGCCCAGCCAACGTACCTAACGGTAGTTCGCACTAACACCATCGCACACCCGAGTGTGCGTGTTATCAGCGCAAAAAACCCAGTGCTCGAAGCAGCGGTATATTTGCAAAGCAGCAGCCACGTGCTGCCTGGCTCACCGGCTTACGGTGCCCAGCTTCCCCCCCCTCCTCACTCCTTATCAACTTTGGAGAAGATGGACTGGCAGGCCCCCCCGCGCACCCACAAGCTTGGAACAACACCACGCAAAAAGGCTCTGAGAACACGCAAGAGC…
GATE	TGTTCAAGTTACGCTCACCCGCTGTCACCCGCTGTCACCCGCTCTCCGCTCCCTCTTACGCTCTCCCGCTCTTCACCTCAGAGTCTCCAAGGAGTCCTCGGGCTTGGGATAGCCTAACTAATTAGAATAAGCATCAGTGTAAAAACTAACCACGCTGAATAAACATACGCCCGGTCGCCGCGCAATTACGAAAAGTCTAGTGTTTGCTTTCCTTCGAGTGTTTCTTTTCAGCATATTTGAATTCAGGACAGCCATCCCCCTACATCCCAACATTTTGGTCCTTCGAGCCGGATCACCTGGATTTTCAAGTTTGTCCACCAGCGAACAAATTATAAGATAAGTACGAAATTTCCATTCCTTTTAATTGCCGGTCTGCAGCAAAAGGTTCGAAAATCCAAT…
G.element	CGAAGACCGGCCACCCCTTTCAGCAAACCCTGCACCATCAAGCTCCCAAGTATCTCCAATATGAGCTACAGAGATGCGCTCATGTCTACCCAAGTGCCTCAGCAAACCAATCCCAACCAAACCCGTCAAACCCCACCTGAATCTCCGCAACCCAGTAACATGGAACAAATGTTTGCTCGCTTCGAAGGAATGGTCGAAAGGATGATGGAGAAGATGTTCTCGCAAATGACGCAGCTTGTTGCTTCCATCCTCAACGCAAAAGTATGCAAAGCCTAAAAATAGTTATTTGGAATGCTAATGGCCTGCAGAGGAGCAGAGCCGAGGTGGAACACCTCCTAAAAACAGATGCCATCGATGTACTACTGGTATCAGAAACCCACTTTTGTCCCAGATCCCATT…
gtwin	AGTTAACAACTAAGAGCACACACTATTAAGAGCACACATATAACAAATTAATTAATATAAACAATGCTGACGCGCCCAAACTGAGTTCAGCGCTCTGCGCCACGAACGGTCAGCAACAGCAATCGGACACCCCTTATCCGGGGTACCGAGCTATGTTGCATAAATGCTGAGTCGGCTTGCCGACCATGGCTTTATGGCGTGATGCATTGGAGCCACAGTAGATTTACATTTTCATATTCTTTTGTATTCAGTCTTAAGCCAGAGCTTTAATAAAGAGCAGCTATTCACTCCGGCTCGCAGCCGTAAAATATCATTTTATTATTTGAACATTCTCGCTGAGCCAAAAGGCCAGCGATCGACAAAGAGGGCAAAGTCACGCCCTCCGACATAAACTTCATA…
gypsy	AGTTAACAACTAACAATGTATTGCTTCGTAGCAACTAAGTAGCTTTGTATGAACAATGCTGACGCGCCAGAATTGGGTTCAACGCTCCACGCGAAGAATGCCTGGCAGCGGAAAGCTGACACTTCCTACCGGGAGTGTTGCTTCACGCTGCAAGAAATGCTGAGTCGGCTTGCCGACTTGTGGCGGCGCGATGCATTGCTCGAGGGTAAACTTAGTTTTCAATATTGTCTTCTACTCAGTTCAAATCTTGTGTCGAAATAAACCACAGCTTGCTCCGGCTCATTGCCGTTAAACATCATTGTTCTTATTTACAATCAAATCGCTATCGCCACAAGGCTAGTGATAATAACTAAGGGGGCGAAGTCAAGCCCTCCAACCTAATCTCCATAAACAGTGTCT…
gypsy10_new	AGTTAACACGAGCAAGTCAGAGGGGTGCGACGACCCGCCGAAATGCCATCCAAGACCGGATGGACCAACAATAACATCGGCGACGCTGAGCCAGCCCAGTAACGCATTTCGCTTTAGCGAAAGCGATGTGCAAGGGTCAGCGTAATGCGAGGCGGGCATGTGCGCGCTGGGTGACCGTCGAAGGCACGGAACTCCAGACGGCACGAGGCGCTGACTAAGCGCTCTGCTGGGACCGCTGCCTCCAACCGAAGACTTGGCGGCCTGAATAAATTTGATTTGCATTTAGTTGGTAAGATACCAGAATTCAGAGCAGTTGGCTCTAATAAAAAGAACCATTCAATACAAACGTATTTGGTTTAATTGGCGCCCAACGCGCTTAAGTGTCGTAAAACCGTAAAA…
gypsy12	TGTAGAGGCGACTGAAGCAGTGGGTGAGAAAAATCTCGATGAATAATCGATAGGGCGGTCAGCTGTGACACACTAAAGTGAGGTCTTACTAGATGTAGCAAGAAGTAGCTAGAATATACCAGACTGGATGCAACCCTTATTAGCTGCACCCGATAAGTTTGGTATAATTCGGTTATCGGAGAAAATGTGTTGTTCAGCTGATCGTGGTTTCCGCCGATGGCCTACGCCTCGACTAATGTTTCCGGTTTGCCTTCTTTTCGATCTGAACAGTCAACGCGTCAAGTTGCGAAAGTGCGTCGAAAAATTTGAACTTGCGGTCATACGGAATTTTTTTGTCGCGCGAAATATCGAAAATACGGCGTTCCTTCGCCTATAGTGATGCGCGAAATAATTCCGGCT…
gypsy2_new	AGTTAACCAAAGCTAACGTCGCTCCCACGGGCGTATGAAATACGACAACATCGGCATACTGCAACGTAAGCATTATGCCGGATGTCGATACGTAGCCGGCAGACACTGCAGATTTGCGTGGCCGCTACGAATATGAGATCGCAACAATGTGTTTCGTTTTCATGCTAGCTCCAAAGTTTGAATTCTTGTATTTTGTATTCAGTTCTGATTTTGTCTCCGACGCTACAGCTCCGCTTAGCTCGGTATAATAAAACATTAAAAGTAACTCCTAATCTTTTATTGTCACGGCTCCGCCTGACACTTGGTTAGTAAAAGCCGCGCGCGTTAACCGCCGGCCAACCCTTTTTCTAATTGGCGCCCAACCAGTGGTATTTGACAGTGCGTTAGTCATTACCCACG…
gypsy3_new	AGTTAACTAAGTTAACCGGACTGATCGTCCGCTGACCAGCATTTGGCCGGAAGCTCGAGCATAGCCGGCAAAGCTCTGCACTTTGGCAGAGGCCGCTATGAAGCTCTTCTCTTTGTAAGCTTTAAGCAGTTCGTTTTGGACACTCATAAAATAAAGAGCCATCGCTCATTAACCAACAACTCCGGCATTCTGTCGTTAATTTTATATTTGATCATAGAAATCTGAGTCCCTAGGCCAATTGCATTAAGGAAGACAGTCATCTTCCCAACGTAATCATCGTAATTCTCCAACTGGATTTATCACCCTCTTCCCCTGTAAGAGAGACACCATCAGCCAACCGGCAAATCATGGGAGACTGCAGCGAGGGACCCCCTGCAGCACCCCCACATTTAATAATTG…
gypsy4	AGTTAACACGCGCAGGGCCAAAATCGCTAACTCCACGATAAGACCGGACGCGGCCGCAGTAACGTCAGCGCGACTGCAACTAAGTCGCGAAATATGACTCCTGCATTCCAACATTCTACTGCCCGGAGCGTGTGAAGCGCAATGTCAGCTTCTGCCGTGAGCGCTGCTTCAGAAGACGGGCTACTTCATATTAAGCTTAAGTTTTCTGTCTTTAGTTTTAAAACTCATCGAACGCGCATAGTCGCAAATAAACACAATAACTAAAATTGTTGTCTGTTAATTGGCGCCCACGGCACTCTTATAGAACTCACAATATTTGTTCACCAGCCAAAGCTGTGACAAATAAACGAAAAAGTGCGAAGTGAACTGTGACAAACAAATTACAAGTGCAAAGCTAAT…
gypsy5	AGTTACCACATCTACATCTACTTCCCCACCCCCTAAACCTCCACGCCAGAACCATTAGTTCGTTGGCCCACATCTGACCACATCAGCAGTCCACGCCACTACTTCCCCACCCCCCTAAACCTCCACGCTGAGCCGCTAGTTCGTTGTCCCCTCATGTTGCAACAGTGTAGGCGGAAACAGCGCAGCAAAACGGAGGCATTCCCCAAATCCGCTGGGTCAGCAGATTCGCGACAACACAGAGCCATACATAATACTTGATTCTCCTTTGTAATAAGTCAGTCTTAAGCTACACTCGAGGGGAGTGAGATCAAAATAAAATCACAACCTTAAAGGGAAATACCTTTTAATTAAAATCGGGAAGAAACAATAGAGGGAAAAGAAACACAAAGGACCACAGAA…
gypsy6_new	AGTTAACTAAGTTAACCGGGCGACGGCTACGACCGATCGTCCGAAGACTCGCTCCGGCCAAATTGCTGACACAGCGTCTGGCCGGAAGCCCGTGCATAGCCGGCAAACACTACCCATTGGAGTGGCCGCTATGAGTTTCATATTTTGTTAGCCTTAAGTTCAGTTTGATTTTATATTCAATAAAGAGCGCATCGCGCCTTGAATCGACTCCAGCTTTTGCTGTCATTATTAAATTGGTTGGTTGGTTGACTAGCCTTAAGGGCACTCAACAACGGAGAGACGTTCTCCCACCATATCTTCTAATTCTGAGGAGAAGAGGTCTGCGGCAACCGCCCTGCCTCCCGGATACCTGCAACCTACGCCGGAGACCGCGGCGAGGGATCTACACCAACATAATTA…
gypsy7_new	AGTTAACACATTCAACGAGCAGCAAAGAGAGGCCAATGCAAGTACTGAAGCTTTCACGATAAGAGGCGAGCTTTTGGCTTGGGATCAAAGGCGAGCTTAAGAAATAAGGGAAGAGCGAATTGGATCATCGAACGCGTCGGTCGTCGCCATGCAGACACATATTATTCAATAAACTTACAAGCTCAAATATAATCCAAATATAATTCGTAGGCCATAGACACGACATCCATAAAAACACAAATCTATTAACTGGCGCCCAACATTCACCTACATTTCCCGAGACAACAAAACTACGTTCAACCGACTTCAACTGCGGATTTTCTTTCAACATCAACAATCAACATCAATACAATAACAAATATTAATTAATAAAAAAAGGATTAACTTAACTTCTGTAAG…
gypsy8	TGAGGAGTCTTAAAACTCCCCATAAATCTCGTGTAGGGGAGTGGCATAGCAACAGCCGCGGTGCAGGGTAAAGCGGAAAGACCGTGAATTACAGTACAGTACTGGACCTTGAACTCCAGCGGGTCAAGGGCGAAGAGGTCGAACGGTAACGGTGCGTGCACAAAGAAGACGGACGGTGAACTAACGGTATCGCTCTGAAACTTGGAGCGGGCCAAGGGCAAATAGGTCGAACGGTAACGGTGCGTGCGCAAAGAGGACGCACCGTGAATTAAAGGCACAATATGTGGACCTTGTACCCGGGCGGGCCGTGCGCAAAAAGGGAAATAACGGGATCCCTGCGGCCTATAAAAGGTAGGCGCTAGCACGGATGCGGGGCAGTCAGTGAGACAGCAAGATCGC…
Helena	AAAGCTCCAGGAATTGACAGGATTTGTCATGCCACGCTAAAGGTTTTACCTATAAAAGCGATAATATATATAGCACTAATCTTTAATGCTATTTTAAGGATCCAAGTGTTCCCAAGACAGTGGAAAATGGCTGTTATTTTGATGATCCACAAGCCTGGAAAACCAGAAGATGATCCTGAGTCGTATCGGCCTATAAGCCTCTTACCCTCCCTTTCTAAATTATGGGAGAGACTTATTGCCAATCGGATCAACGACATTATAAGACAAGGCAATATCTTGCCGGATCATCAATTTGGATTTCGAAAGGGACACGGAACTATTGAACAGGTCCACAGACTGGTGAAACACATATTACAGGCTTTTGACGACTGCGAGTACTCCAACGCTGTCTTTATAGAT…
HeT.A	TAAATAAATAAAATAAATTAAACAATTAACTAAATAATTAAATAACTAAAATTAATAATATAATCCGTTCGCTTGCCAAAGACTCTCACGCGCATAACTAATTAAAATCGATTTTCAAGTTGACAAATAAATGGTTTAAAATTGTCCTCAGGCTGCAAAGAAAAGCCGCGGCAACAATAAACATTTAGTGACACGCGAAAAGCGAACATTTGATTAGTGTAATACTTGTGCAAACCGACAAGCTGCCGCCATAACAAAACGGAGACGAAGAATCATAAAGAACAAAAGCTAAATCCACCAGCATAGCAAAAATAAATTAACAAATAAAATAAAAGCAAATTTAAATAACATAATAAATTAAACTTATTTAATAAACCAATTAATTTTAATTAATTCAAT…
HMS.Beagle	AGTTATTGCCCTGCAATTGATTCTCTAACATCTTGTGGTTCCACATAGTCTCCGCTGCCATCAACGCCAACGAACGGTTAAGCGCGACATCGACACTTCTGCGCTGCGCCGCGGCCGACGCCTGCTGCGCCGCTGCCGACGACTTCACTTGATTGCTAGGGACTTAGGGAAACATTTTGTACGCTAGATTTAGTTTCAAATGATAAATTGCAATAAACGGTCGCTTGCGATCTTCAAAATCAAATCGATAACTGTAATTATTAACTGGCGCCCGAACAGGGACCAGCGAATAAACGCGAACGAAAGACAAAATTCTAAGTCGCGGAGCAAAATCAAAATTTTGCTAAAAAATATTCGTTGGTTAAATTGTGCCGAAGAAACTCCCGCGAGTTATTAACA…
HMS.Beagle2	AGTTATTGCCCTATAAGTTATCGTCCCACATCTTATATTTCAACATCATTTCTGGGTAAACACAAGTGCCCAAAATGCTGACCAAAGGTCTGCATTCTTTCCGCTGTCAACGACCAGCTAAAAGTGCGATCATCTGCACTTCTCCGCCGCGTAGCCGCTGACGACCACTGATTCGCTGCCGACGCCTGCTGCGACGCTGCCGACGCCCACACTTGATTGCTAGGGACTTAGGGAAATATTTTGTATCTTAGCTTTAGTTTCAAATGAACAATTACAATAAACGGTCGCTTGCGATCTACAAAATAAAAATCAATAAACTGTAATTATTTACTGGCGCCCGAACAGGGACCAGCGAATAACGCGTACGACAGACAAAATTCTAAGTCGCGAAGCAAAATA…
hobo	CAGAGAACTGCAAGGGTGGCACTTTTTTACCACTCGACTCACACCCTACAATTTTGTGTGCGGGTGCTACTCGCCACGCACATCGCGGGTACTTACAAACACACAGTATAAATCTGAACATGCAGACAAGACACCCCGTTGTGTGCGCACCCGAATCAATACGGTGTTTTGCGTCGCGGGTGCCGCTCACACAGTGCCTAAAAAGGGATGAGTGAGAAAAACACTTGTGGGTATACCGTTAAACACATGGGTGTTTCCAAAAATACTCGGGTGTTTCCAAAAATACTCGAGTGGTCTCGTAGGTAGTCGAGTCAAATGGCGCCATACATAATGATTGTTGAGTTCTTGTGTCTTTGGTCCAGTGTCTCGGCTGTTAATTGCCCCTTTTTTGTTTTTTAC…
hopper	CACTATGGGGCATTTGGCCTGTTTTTTTTACAAAAATTAATACCTCCTAAACTATTGGAGATATTTGGATGAATTTTTTTTTATGCGTTACACATGCCTCCAGGAATATTTTGGAAAAGTGGGCGTGCCCCAACTCCGCCCCATTTTTTTTTTTTTTTTTTTTTTTTTTTAATAATATATTTTTAAAGTTTATTTTTAATTTCAATAATGTATAATTCATAACCGTCTTCCTCTTCACAATCAGTAGAGTCTGAAGAATTTTTATCAGGTTCAAATTCGCAAGCTAACATTTCAATGACTTCTGGTGGAAGAGATAGTCGCTTATGTTTTCGCCTCTTTAAATTTATTGATGATATTATGGGATCCGAAGTATCCATTGCTCTGTAAAAGACATCTGCG…
hopper2	ATAAAAGTTAAAAGTTTCTAAAGTTAATTTTCAATATTAATATTGTCTAAAATTTCATAGTCGTCTTCCTCTTCACAATCAGCAGAGTCTGAAGAATCGTTATCAGGTTCGAAAGCTAACATTTGAATGACTTCTGGGGAAAGAGGCAGTCGCTTATGTTTTTGAACGCGCCTCCTTAAATTAATTGATTATATTATGGGATCCGAAGTATCCTTTGCTCTGTGAAAGAGATCTGCGAAGCTACAAATACGATTATGCTTTCTTGAATGGTGAAGTCTGTCCGACTTGTAAATTTTATTCCTAGATTCTGCTGCCTCTTCTCCAAAATAGTCGAACTGTTTGCTCCAAGATATTTTTGAAGTGAACCAATATTTTGTGGACTGTCGCTGTCATGGGAAG…
Idefix	AGTGACATATCCATAAGTCCCTAAGACTTAAGCATATGCCTACATACTAATACACTTACAACACATACACCCCAATACAACATACACTACTCCGGATGTACCCAACAGATACCAGATAAGAATAAGATTGTTATATGATCCTCGAGAATGGAAAAAACCCCAATTCTAGATAAGTCACCCACTGGTAGACTAAACATCCGTCCCCTAATTTAAACAATTCCTTGCTTAAGCCTCACCCCATCGTCACATTCCCACGTTCAAAGCTCGGAGCCGCAATCCCGAAAAACAAAAGTATCGATTTCAATAAACAAATTATAAGAATCTAAGAGCACTTGTATCCAAGAGCAAATGCACTTGAATCCAAGAGAAACGCAAAGCTTTTTCTCTTTACGATCAGAA…
I.element_new	CATTACCACTTCAACCTCCGAAGAGATAAGTCGTGCCTCTCAGTCTAAAGCCTCGCTTCGCGTAAGCCCAAAACTCTTATCAGCAAAATCTTGATAAACAAATATCAACCACAAAGAGAAAATAAAAAACTTAACAACAAAAACAACAATACCGCTAATCCGGGCTCAAGCCCTTAACCAACAATCATGACAGACCCACCAAACATTTACAAAATCACTTCAAAAACATACCAATCCCAATTAGGCGAACCTAAATTTATAATTATTAAAAGAAATGACAACAACTCTTTCGAAAGAACTTCACCATTCATCATAAAAAAATCGGTGGACTTTGCCTGTGGAGGAGAAGTTGAGGGATGCAAACGTACAAGAGACGGCAACCTGCTAATAAAAACCAAA…
INE.1	TATACCCGTTACTAGATTCGTTGAAATGAATGTAACAGGCAGAAGGAAGCGTCTTAGACCATATATAGTATATACATACATGTATATTCTTGATCAGGATCAATAGCCGAGTCGATCTTGCCATATCCGTCTGTCCGTATGAACGTCGAGATCTCAGGAACTATAAAAGCTAGAAGGTTTAGATTCAGCATACAGAGACAAAGACGCAAGTAGCCATGCCCACTCTAACGTCCACAAACAGCGCAAAACTATCACGCCCACACTTTTGAAAAATGTGTTGTTCTTTTCACATTCTGATTAGTCTTTTACATTTCTATCGATTTCCAAAAAAAAACTTTTTGCCAACGCCCTAAAACCGCCCAAAACTCCGACACCCACATTTGTAAAAAATTGTTGGGA…
invader1	TGTCGCAGATCATTTAAATGAAACGAAATTTCGTGTTTCTGCTTGGCACGCGCCATGCAGACGCCTCTTTTTATTTTTCTGATGCGCGGCAGACAACCGTTAGAGTTTCTGCCGAACGTAGTCTGGTCGCGGGTAGGAGCGGGGGGGGAAGTAGATGTCTGTACGAAAACGAGAAGCATACAGAAAAATGCGGTGTGCATAAGTATTGGTGTATGCGGACTAGAACAACTGTCATAATTGTGTTGGTATTGCATGTAAAGTCAAGAACTACGCATAATTCTGATTTTGTGAAGAAGAGATCAGTCAGTCAGTTTTCGATCGTTACGCATAACAGACATGCCTCGCTCAAGCGCCAGAAAACGTCGCGCGAACCATAACGAGAGTAGTGAAGAGGAAGAA…
invader2	TGTAGTAGGCTAGAGGTACACATACATAAGTTCAGTTCATAATAGCAACATAGTATATAAACATTAAGTACTTGTTCGCTTTCGGGTGGCATTCTCTCTGTTTCGCAACATCGGCCCTGTAGCAACAAGCATAGAGGCAGATCGCAAACGGAGAGGGAGTCAGTCGAATGCTAAAGCTGAACACGGAAAGTAACAAATAAATCAAAGAGTCCAACTCCTGCCTTTGTGTGTTTTAGTTAATTAAGAGGATATATAATACCCCTACAATATCAGAAGTGGGCCGATCACGAGCCAAAGAGAAAAAAAAAATGAATATAAGCAATGCATCGACGGCGCAATTAAAAGGATGGTTGAGTGAAGTAAAAGAACCAACCACGGGAACAAAAAGAGAATTGATTT…
invader3	TGTGGTAGGATGAACACTCATAAGGCCCACGAAGCATACGAGGAAGCATACGAAGAAGCATACGATCATATCCCCGTTAGGAATAAGTATATCATTGCTATCTCGCTCTTACTTATAAGCTAGCATTAAGAGATAAGAATGTACACCTAGCTCACTCTCTCTTTTGAAAGAGCATAAGAAAAGAGGAATACGCGAGACGCGGCATTCGGTGGCGTGAGCTTGAAGTGAGAAGTCGAATAAAGAGATTGTGAAGTTATTTAAAGGAAGGAGCACGTGTATTCATTTTTCGGCGTCCACAACATCAGAAGTGGTCATTACCCACTATGCCTGACACTAAATGGAATCAATTCTCAGTGCCCCAACTAAAGAAGTGGTTGGAAGCTCTTGGATGCCAGACTT…
invader4	TGTCGGAGCGCGACTCTTCGCATTCCAGAAATTCCTTCTGTGATTTCATATTCTGATGAAATTGTAATATTGCGGTAAAATTCTGTCGAGCGCTGCGGCAGAGGCACGAACAGCCTCTGCAGCTGAGTGAGGTCCGATCGAGTGGTCATAAATAGTGTGTTAGAGAGAGATGACAATGTGGCACACGCCAGTGTGTATAGCCATTAGAGAATATGATGAAGAAGGGACATGTAAGAAGATCCCTTCAGTGAAGTTTGACTGCTGACGTCGATCGGAACTTGCTGCGCTGACGCACAAAATCGCGAAGTGAATAAATAATATGGATGAGACTCCTGTTTCGCCGACATCAGAAGTGGGATCGCCTTCGCCACAAGAGACCAGATCTGATCAGTATATGGC…
invader6	TGTCGCATCATTATTAGTCTTATTTTTATTTTCTATGTTCCATCTCTAATAAACATGTCATCTCTATTAAATAAAATTCGTATCGAGCTGTTCTTGTCTTCGTTTCTCTTTGATCGCTGTTCGCTGTGTTCCGTTATGCGAGTTTAACGGGTTTTGCTCTGTTCTACATAGTCTCGGTTCGACGATGCGTTAGAGTGAGACAAATGCTTGTCCTGTGGTGAGTTCGGACCAGCATGTATCAAGCGAGATAGAGCGATGTTGAAATGTACACGGGGCACTTATGTTTGAAAACTCTGAGAAAGCGGACGCGTGAATATGTCGCAACCGAGGAAGTGTACGACTCGCGGGCGGAGCGCGGCAACAGAGGACCCCGAATCAGTTAACTTCCCGACATCAGAA…
Ivk	CAGTCACCGACTATCTCTCTTCGAGTGCGGACGTCTGTGTCTTTCCAATTGTGTGCGCTTTGCTTATCGCGTAATTACCATCGCCCAGCTTATCGCCGTTACATTGATCTTTATCATCTTATCTTCTTGATCTTCTTATCAACGCGTACGTGCAAATCCAAAAACATTCAATATCCATAAATTTATTAACCATGGCCCCCGGGCCACTCAATTTGGGGGATAATCGCTTTGCCAGTCTCAGCGTTAGCCCCAAAGCTAAGAAAAAAAGACCCTTTCAAAAATTACAAGTTGATTTCCCAGACCTCCCTGAAACGCAGTGCAAAAATCCGAGATATTTAGTGGTCTCATCAAAAAACTCTCCGAAAACCATATCCGACTACAACTGCTTTGCTGTCCATA…
jockey	AAAAATCATTCACATGGGAGATGAGCAATCGAGTGGACGTGTTCACAGAAGTCGCGAGATAAAACAAAAACGTAATTGTGATCCATCACAAACATCTGCGCAGATCGTGTGCTTATCTCACAAACAAAATCTATTTTTAGTCACTGCATAACGGTGACGGCTTCGGTTCGCGAAACTTATCAGCAACTAGCAATTTCTAAGCTGTGTTGTTTTTGCCCCTCGCCCTGCGCGCTGCGCAAGCGGGAGGTTGTTACAATTTACCTTACAAGTAAACCGGTAAATCTTATCGTGTTTAGTAAATATCAATTGCATTATACGGCATAAGTATAAAGACAATTGATATAATGGAGAATTCATTTGCTCAATCGCGACCTAGCAATGGGTGCGATAAATTTGAGA…
jockey2	CCTTCGTTGCATTCGGACGTTCGCGATTGTCTAGTCTTTTTGTAGTGAAACATCAACAAATCTTCCAATCTTACTGTGCACGCGCACAATTTCTATTTCTATCCACTGCACAGCAGTGGTGACAGACAATTACGGTACTTATCATAGATAAGCTCAACCAAGCCGACGCTTTGTACGCCCCTCGTCTACGCCTTGGGCAAGGCTGTTACAGTTTGTTCTCCGCTTGTTATCTCTCGAGCTTGCGAAGTTGACAACTAGTAGTAACACCAATGTTACCAACACCATAACCACGACTCAAGCTAGCTGTTCGCAGGCAAGAAGTGCTGCAATGTCTGATGCCATATTTTTGGGCACTCCAAAAACTATTGTCTCCAGGATCCAATCTGTGGCAAGTGTGCT…
Juan	ACAGTCTTCGACTAGCTCTTGTCGAACGCGGATGTAAAATCTTCTATTCTCTCTGAGAACATTTTGGTGTACATTAAATATTTTCTGTTTTCTTCTTTAATTGTGATATTCGCAAAAAACTACAATCAAACGTTCAAGTGATGCAATTGGCGATGCTGAAGCATCTGCCGTTGAAAAAATGCGTACTAAAAGGAATAAACCACTAGTGGAGCGCCAGAACGAACGGGGCTCCAAGCAATTTACAAATTATTTTCGTCCACTACAAACTTTAGACGATGATAATGATGATAAACCTATTGAAACGGACACACTTGATGAAAAAATAATCAAACCACCTCCTATAACATTAATTAAACAAAATACAAAATTTGTACACGAGCTAATGGCTAAAATTAAAAC…
looper1	TTAACCCTTTCGCGCCCAACGTTGCTTGTGAGCAATTTCTATGTTTTCAGAGCTAACTGTAAGCGTGCCTTTTGTTTTTATCTGCTCATTCTTTATGATAACGGTGCTTTTATGTGTCTACTCTAAATATGAAAAGCAAAAAACGCATTTGGAGATTATTTGCAGAAAATATTTGCAATAAACAGCACGCGCATCACAATAATTATTGTTTCGATATTCGGTGGAACTTTTGGAATTAGTAATTTACTTTTATAATACTTTAAAAAGAACCTAAAGTATAAACAAATAATTATTTAGCAAAGAGTTAACAAGACAGTGATATAGTCAAACTTAGTTAATAGTGAACAATAAGTAAGTAAATAATTTTCTAAGTTGCTTGTGAGCAACCTTGGGCATTCG…
LRsp_Satellite_Rsp	TCTAGAGATTCTGTTCAACTGGTAAGCAAAAACAGTAAATTGCCTAAGTTTTACATTTTAAGCGGTCAAAATGGGTGATTTTCCGATTTCAAGTACCAGACAAACAGAAGATACCT
Max.element	TGTTCACGCCAGAAGGGCGCAAACAGTTGAGCGGCAGTGTAAGCGGCCAATGCTTGTACTCGAAGCTCCTCCACGGCTCGCAAGCACCGCTGCTCGCGCTCTCCTTCTCTTCTCTCGCTCTCCTCCCTTCCCGCAGGGTATTCACCACTCCGCGGTCCCGCGGTATTTCTACTGTTAGTGTTAAGGTGGTTGTAATTTACCAGTGCGTGAATAAAGAACGAAAGGTTGAAGTCCACCCCGCGCGTTTTTAATTTCGGGGAAAATTTCAGCAGCCGCCGCAGCAACCACAACCAAAGGAATCTTTCCGCCCACTCCATTTCATGGTCCTTCGAGCCGGATGAGCTCTGATCCTGCCAGCGCTCCTTGCGGAAAATTCAAGATAAGTACGGCTTTAAATCC…
McClintock	AGTGACGTATTCACGCCAACTCATCACGCTCAGTTAATTGAATATTCGCGCCACCCAAACTGGGCCGCTCTTGTAAACGGATTCCCAAGCTCTCCTCAACGTAAACATCCAAGAACATCACATGATTTTACCGTTTAAAGCTATTTTCTGCGTTATCTGCGTGTCGATCGTTATTACTTCACTTCACAACCTTGGGAGATATTCCGTTTTTTTCCTATTCTTTATTTCTGTAACCCATAGAGGCCCCTCCTCAATTCTCACTCACATTTGTAATCAGTCTTAAGTTGAAAGTTAGACCGTAAAGTTCAATAAGTCTTAAACCGATATTTAATAAAAAACAAAACCGAATTTATTCAGTGTTTAATTTATTTCGGAGTTGATCCTAGTTTAAATACGGAT…
mdg1	TGTAGTATATACGAATATAATAACAATAATAATAACAATAATAATAATAATATTAATAATAATTATAATATGAATCATAATAATAAGTCAACTAATAAGTAAACTTAGGACCACCCTAATTCCTTAGGGTCACCCTAGTAGATCTTTAGATACACCCTAATACTAAATATGCGAATTCAGGATGTACGCCTTTAGGGGTCGGACTCGACTCCCATTGGTTATCGAGTATGAACTTCATACATACATATTGCAGAATTTGCTAGTGTCAGCACTTGGCTGTCACAAGAGATCTCCCTGTAGACCACACTAAGATCAGTTATAAATCAGGAATAGATCTGGAATGTACACTCGCTTAATAAAAACCAAATAAAGATAAAATGACCAACTGCGTTTTGAGAC…
mdg3	TGTAGTAGGCTGCACCTTCTACCCTCTTCCTTTACTCTTAGTCATACATACCTAATTATACATAGCCAATCTAGTCATAAGCTTATACACTCATACACCCATCCTTAACATACAAATATTATCGAGAAACTTATCGACTAATCGACTCGCCACTCTGCAGAGAGCGCGGCAGTCAGTCGCTGTTGAACCAAGCTAAAGGACAGATCAAAAATAAAAGAGACACGTGAAATTGTATTAGAATATTAACTTCTGTAAACGGCGGCTAAAATCTCAGAAGTGGGATTAATAATCCAAAATGGACGATAAAATCATCCTGAACGACTTTTCGCTGACAACCCTAAAAGATTGGCTACGTATTCTGGGCCAAAATACGGAGGGCACAAAAACCGAATTAATCGC…
micropia	TGTCGTGGCGAAAATAATGAGTATGCGTGTAGTCGCTGTTTACTTCTTCTCCATGTTCCCTTTGCTATTATGCGTGTTCCTATTTATGAACACGTGGCGAAAATAATAAATGCGTGTAGTCGCCGTTTACTTCTTCTCCATGTTCCCTTTGCTATTATGCGTGTTCCTATTTATTGTCAATGTGTGAGGATGAATAGATGAATTATCTATGAACGGGATTTTGCAAAAACGACTTGCGCTGCTTGGTTAGAAAGGGAAAACTATATAATGAAAAGGGAATGCCAAAAATTGAGAAGAGACAAAGCAGGCTGCACGAAGCTGGAGTGAGGGCATTAATCGTGGAGAAGCCAAAGCAGACGCAAGTGGACTCGTTGACTGCGCACAGCTGCATAAAATTAT…
opus	AGTTAAGAACCCTCTTCTTGCGCTCTTCGTCAGGACTCACCAGCGCTCGGCTCTCGTGTTTTCGGGCCCCGTCAGCAGGCGACTCGGGGCCTGTCTAGTAACATGTTCGTGTAAGTTACGAACCCTCTTCTTGCGATCTTCGTCAGGACTCACCAGCGCTCGGCTCTCGTGTTTTCGGGCCCCGTCAGCAGGCGACTCGGGGCCTGTCTAGGAACATGTTTGTGTATGTGTGCATTCGGAACAAGTGCCGTTGGTCGCACTCAGGGTGAGGGGTCAACGGGGGAAGCGGATATAAAAGCAGCGGGGCGGGAGAAGAGGTCCCAGTCTCGAACGGACACATAACGGAACCGCTAGCAGATCGCGAACTGAATCTTAAAATAAAGCTAATCGTAAACTCGA…
pogo	CAGTATAATTCGCTTAGCTGCATCGATAGTTAGCTGCATCGGCAAGATATCTGCATTATTTTTCCATTTTTTTGTGTGAATAGAAAATTTGTACGAAAATTCATACGTTTGCTGCATCGCAGATAACAGCCTTTTTAACTTAAGTGCATCATATCAGCTGTTTTTTTTGCCAATTTCAATGAATATCATCAAAGTTAGCTGCGCCATCTATGAATCATTTTTGCATATCTAAAAGATGCAAGAATGCCAACTCGTTTCAGTATCTGCGCATGTCCGTTTTTGTTTTTGCTTTGATCGTGATTTTTGTGTTTTTGTTTCTTATGGCACAAAGTTATTAAAATGGGTAAAACAAAGCGTGTCGTTGGACTAACACTAAAGGAAAAGCTTCAAATAATCGAG…
Quasimodo	AGTAGCATATGTGCCATAGTATAAGACCACATATACTTACACACACACACACATACATAACCACATAGGAACAGCCATACACAAAATCATAGAATGCCTTAGGATATAAGTCATAAAATCATGTATCCAATAAGAACCCAAATTCTGGTGACAATAACAAATCCAGCCTACCCTAATGTAAACATTAACATCCGCTGCCGAATCAGTTATTCCCACCAAAGGGTCAAAACCGCTTACGCAGCTCAAGTTCTCGGCTGATCAGTACCCATGAGTGATCCACTCAAGAAGGCACCCAATCCAACAGACATAAACATCCGCAGCCGCATTCGCGACTCCCACCAGAGGGTCAAAACTGCTAACACAGCTTTAAGGGTCAAAACTTTCCACGTAGCTCAAACT…
R1A1.element	CGGACGTGTTTTCGTTGCGCTCGTGGACATAGTGCGAAGAACTTTGTTTTCCGTATTTGGAAGTATACGGAATAAATAATTTAGTGTTCCGTGGAAGTGGTGCGCAAATTTTCGCGAATTAAAAACAAGCGGTTTGGAAGTAATTGACAATAAATTATTGGAAATTTTCCACTCCGCACGTGTTGAGCGGCGGAGCTTGCGGGTGAGCTTTTCGAACAGCTGAGAGAAGCTTATTGGTGGTAGTCACCGCTAAGGATTGTGTCTTGGGACAGCTTAGTGCACTCTACCAATAGGTGGAGCTATCACCATAGCAACTAGCCCGTGTCAGCGAGCATACGATTGCTGGACTCGTCAAAAGGAGGAGCCACCATCGGAGCAACGCCGATGGAGAGCGACAGC…
R2.element	TTGGGGATCATGGGGTATTTGAGAGCAGAGGGGGAGTATTCTTCTGTAATTCGTAAGTCATATCATATGATGTGCGGAAGGGGAATTTTACTCTGTAACTCACAAGTCTCTCCTTTACTCAAGTCGACTCAAAACCTCCTCGTGGTGGTCCCGGTAATGCTAAACTCGTTTAGCAGCTAATTTGAGCGGAAAAACTTTTCCGATGGGCTGGTTCCCCAGAGGAAATTTATTCATATTGGAACTACAAGCACAAATAACGAGCCTCGGATACCTTTACACAATCTGATGACGACCCGACCCTCCGTGGATATCTTCCCGGAGGACCAATATGAACCAAACGCAGCGGCTACTCTATCTAGGGTTCCCTGCACAGTATGTGGCCGGTCCTTTAACAGCAAG…
Repbase_Bica	TGTCAAGAGGAAGAGCATGAGAGAGGGGGAGTTGCTTGCGAGATGCCAGGGAGTGCGGACGTGTGCTCGCTGCGTGAACGATGAAGGCAGATGTATACTGAAGACATATAACTATTGTAACACATTAATAAAAGAAAAGAATAAACATGAAGATCAACCTGACAATTCAGAAGTGGGATACAAATTCATTTCTAAGTGGAAAATGTGAATTAAAGAAAACGAGTTAAATAGTAAACGATTGGATTAGAGACGTACAACAAAACGGCACGGAATAGCAAAACGGTTGTACAAGAGCAAAGAGAGATTCGGAAAAACGGCACGATATAGCAAACGTCGAATAAAAAAAAAAAAGGGAAAAGAGGAATAGTAAACGATTGGATTAGAGACGTACAACAAAAC…
Repbase_Chimpo	TGTGGCGCCCAGACTGAAGCCCGGTCTGGCATCACGGCGAAAACAGGTACTAACGCCAAGACCTTTCCTGGAGGACGATATCTTCTGATATCGTCAGACTGGACACACTGGAACTTCAGCTCCGCCGCGCAACAAGCTTACGGCATTAAAACAACAAGATATTGTACTTAGTAATTAAATAAAGCGGTAACTACATAAGTTACCATATTGGTGACCCCGCAATAAGCAAAATGCAGAACACCGGAGATTGTTTGCCTGCACCGCCCACTTCGCCTGACTCTGGTGAAATTCAACGCGGCAACAGCGCAGGCACCGTTATTCCTGTCGTCGAGTCGGTTGCCACCATCAAGCTACCGCCATTTTGGAAGCAAAATGTGCGGTTATGGTTTGTGCAGATCG…
Repbase_Chouto	AGTTAACAAGTAACATCAGGAAAAGCTGCGTGTGACGACGAACGACACACGAAGCTATACTTCGGATGCTGGTCGGCGGCCGTGATCTGTGCGAGATAGGGTAATCTTAAGCTTTCTTTCTTTGTATTACTTAGTTCTGAACTGACAGCCGAAATAAAGTGATGTTATCGTAAGATACCTGCCGTGAATATCAAGTCGGAGCTACGACCCTGCTACCGGCTTATTCCAGTTGGTCACTTCAGCTATAGTCACCGATCGTGGACACCACCTGATCCCGAGGTGATCCGCACTCTGCACCACACCGCCGCTGCAGAGGCGACAACGAGGTGACTGTGTTGTGAGCAGCAACGTGTCGCAACACACATTCAGCAACCACTTGGTCACTTTAGCTATAGTCAC…
Repbase_DNAREP1	TTATACCCGTTACTCGTAGAGTAAAAGGGTATACTAGATTCGTTGAAAAGTATGTAACAGGCAGAAGGAAGCGTTTCCGACCATATAAAGTATATTTATATATATATATATATTCTTGATCAGGATCAATAGCCGAGTCGATCTGGCCATGTCCGTCTGTCCGTATGAACGTCGAGATCTCAGGAACTATAAAAGCTAGAAGGTTGAGATTAAGCATACAGATTCTAGAGACATAGACGCAGCGCAAGTTTGTTGACCCATGTTGCCACGCCCACTCTAACGCCCACAAACCGCCCAAAACTGCCACGCCCACACTTTTGAAAAAATTTTTTGATATTTTTCATATTTTTATTAGTCTTGTAAATTTCTATCGATTTGCCAAAAAACTTTTTGCCACGC…
Repbase_FB4	AGCTCAAAGAAGCTGGGGTCGGAAAAATCGAATTTTTGAAATTTGAAAGCTGGAATCGTTTGCCCATTTTTTGCCCATGTTTGCCCACCAATTAGTTTTTTTTGCCCACGTCCAGTTTTTGAGATATGGATTTTCGAAAAAGTTCGAAAATGTTCGAAAATCAAAAATTTCGCTTTTTTCAAATTTTTTTTTTTTTAAATCGCAATAACATCGTTTGCCCACGTTTGCCCACCCTTTAGAATTTTGAAAAAATTTATACTTTAGAAAATATAAGGCTTTTAAGTTTACCTCGGTCTAATCAGAGAGTAAATCGTTTGCCCATCTCTTAAAACCAAATATTATCAACAAAAAACGTTTGCCCAACCATTATTATTAGTTTTTATCGTTTGCCCACCCTTT…
Repbase_Rt1a	TCGAGTTCCCGCGTATTTCGCACGTCTTTTTGCTGCGCTGCGCGAATTTCGTCATATACGAGTCCGGTCAGCCGTAAACTGCAACATAAACCTGCAAATCCACTCTGGGGTTTGCGCCGCGTTTCTGAGCGTCACGGTGTCGTTCCGGAATTCACGAGTGATCCAGTAAACTGGTAATAAATCAGATCAGCTGCATCAGACAATACAGCTGATAGCATTGCCAACCTTTCGCAGTCGACGAGCTGGTAAGACTGGCGTTGCCAGATCAGCGGTGCGATCGTCATTCGGCCGCGCGCTCGTTGGGCGCGAAATTCGAATTCAAATTCAAATTTGAACTAATTAAGTTGAACAAAAATTTGAAATATAACCTAAGAACTGAAGCTAGTTCTATTTCCCACG…
Repbase_Rt1b	ATAAAGCAGCTGATAGCGCTGCCAACTTGGCGCAGCGGGCGATCTGGAGAGGGAGGCGTTGCCAGATCAACCGTGTGATCAGTGTTGTGTTGCGACAGTAGAGCGCGAAATTCAAAATTAAACTTAAAATTAAACCGTTGAATTTTAATTTAATTTTAATTTTGATTCTGGTTACTGGGAGCGCACAAGTCTTTAAGAAAGGGGAAAAGGCACAAAGGTCGAGGACAGACCAAATATCATCCTCTCACCGTGCTGGTGCCTAAGCAGAGGCTCTGGTGTCCGAGTCGAGGCGGTACAAACCTCCATCCGTAAAAGCCAGGGGGAAATCCGTGGCCTACGTGGGAACCCCTTTCTAAGGCTGGTGCTTCGCCTAGGTAACCTTAGGCCATCCTTCAGTTG…
Repbase_Transib1	CACACTGGTTTTTTATGTGTTTTTTTTTGGCAGAAAGTCAAAAAAAAATATTTTAACGGAATAAAAAAATGTATGGTTTCTTTATATTTAGGATAGTCTTATTAGATAAAAAGTCGATTTTTACTTTTTTACGCAAAACTGGCTTATCGTCGACCTCTCAAAGACAGCTGATTGTCGATAACATGCGTAAGACAAAAATTGATGGCAAATCATTTTGCAACATTTGTGGTTTATATTTCCTCAGAGAATTAAAAAAGTTTAAAGTGTTGTCATGGAAAACAGTAGCACAGGTATGTAGATTTGTAGTTCACTAACATTTTTGTGTATGTTATATGTTTTTGTGTAGTTGTATCGTGTTTTGTTTATGTGCCTTTTTTACAGTCAACTTAACAAATGTAG…
roo	TGTTCACACATGAACACGAATATATTTAAAGACTTACAATTTTGGGCTCCGTTCATATCTTATGTAAATGAATCGAGAGCGATAAATTATATTTAGGATTTTGTTATCTAAGGCGACATGGGTGCATTGCTCAAAAACATGTAATTTAAGTGCACACTACATGAGTCAGTCACTTGAGATCGTTCCCCGCCTCCTAAAATAGTCCCTTAGTGGGAGACCACAGATAAGGTCCTCGCCGCTCAAGATAGGCAGATGTGCCCGAGCGTGGGACCTCGATAAGGCGGGGACTATTTACGTAGGCCTCTGCGTAGGCCATTTACTTTAAGATGCGATTCTCATGTCACCTATTTAAACCGAAGATATTTCCAAATAAAATCAGTTTTTTTACAAAAACTCAAC…
rooA	TGTCTAAATATGTGTTTAGACATGATAAGTAGGCAAACTATAAAAATGTTCTATTTATGGGCTGCAATAAACATGTCACTGGACAGCATAAGTGGCAACTACAGATAAGTACGATTGCAGCGGCCTATTGCCGAAGTGTCAAGAGATATGACCACGCGGGAGGTGATTAGCGCGGTCATAGTCCTCAAACATAGATTTAAGAATAAAACTCAGCTGCATTTACCAACGCAGACTGCGGCGTCTTACAAGCGCTGCATTATATAATTAGATGATAAGAACCTATGTAAGAATGAATAAAAGGCGAAGCCCTCGCAGTAGCGAGTCAGTTAGATTCAAACACCCGAATTGAACTCATTAAGTGTACGCACAAGTTTATAGTGTGAACATTTTCGTCCTTTC…
rover	AGTAACATAATATGCTTCTCATATTACGTTTACATACTTACACTAATTGTACATACAATCTTGCACATGCATAAACACATGAAACCAGTTTACATTTTTACTTACACTTAAGCGCATAATTTGTTGTGCATCCATACCGTTATTTTTCCGTTCTTTTTTGTACACATATACTGATTAGACATTCCCGTTTCTCGCGACTCACTTCGAGCCGATCAAAAACTCTGTACAGTCAGTCTTAAGCCGACAACGAAGAAATAAAGATCTAAACTAAAAAATACCTCGTGTTGATTCTGAAACTTCTTTAAAGGCGTTGATCTTAGTCAAACGACGGATCATTTGTTCGACTCGAATAGTAAAATACGTAAGTGGCGCAGTCGGTAGGATAATACATTGTTGATG…
RRsp_Satellite_Rsp	TCTACAGATTATTTAAACCTGGTACACAAAAACAATAAATTGACTAAGTTATGTCATTTTAAGCGGTCAAAATGGGTGATTTTTCGATTTCAAGTACCAGGCGAACAGAAGACACCT
Rt1c	GGGGACGCGCGCGAGTAGCCGTGTGAATCGAGTTGGCGCTCCTGGAAAACCCCAAAATTTTCCGTGTCGCGGCGGCTTGATGGAGACAGGAGTGGCTGTCTCTAACACACAGTGCCGATATGAGTACTCACCAGCAGTGGGCAAGCTCCAAGTATCCATGGATCGCCCGCCGGCGCCGATCCTCAGGGCCATGGAGCAGGTCAGGGTGAGAGAAGCAGCGAACTTTCTCTGCACTACTTTCTCTTTGTCGCTGTGTTGTTTCTTTTGGCGTCTTGGCTGCCACCAGACTTGCCGGTCACGCCAGCTGATCTCGCAGTCAGCTTGGAAAGCAGTGCTGGTAAACGGCTAAAGCACCGCGGTCTGGCAGCGCTGGTCGGATGCACGAGTCCCCTAGCACAG…
Satellite_260bp_1pt688	TGGAAATTTAATTACGAGCTCAGCGAGGTATGACATTCCATATTCAGACAATTAATTTTAAAGTTGTGGCAAAAAAACTGATTATTTAATGACCGAAATTTGGAAAAACGGATTTTGCCAATAAGTTAATATTTACTTTTTGAACGATTTAGGGAAGTTAATTTTTGGTTTAATTTTCGAATTTTTTTGAAAGGGGGGTCATCAAAATTTGCATATATGCCGAAAAAATGTAATTTTCATTGTTGAACACAGTTTCAT
Satellite_353bp_1pt688	ATGAAACTGTGTTCAACAATGGAAATTAAATTTCTTTGACATAGTGTGCAAATTTTGATGATGTTACAAAATATGTGAAAATTTGCCGAAAAATTGATTTCCCTAAATCCTTCAAAAAGTAATGGAGATCGTTAGCACTGGTAATTAACTGCTGAAAACAGTTATTCTTGCATCTATATGACCCTTTTTAGCCAAGTTATACCGAAAATTCCGTTTCTAAATATCAACTTTTTGGCAAAATCCGTTTTTCCAAGTTTCGGTCATCAAATAATCAGTCTTTTCTGCCACAACTTTAAAAATAATTGTCTGAATATGGAATGTCATACCTCGCTGAGCTCGTAATTAAATTTCCA
Satellite_356bp_1pt688	ATGAAACTGTGTTCAACAATGAAAATTATTTTTTTTGCCATACTTTGCAAATTTTTATGGGGGGTCATAACAAAAAATACGAAAATTGACAAAAAAATTGATTTCCCTAAATCCTTCAAAAAGTGATAGTAATCGTTAGCGATGGTAATAAGCTGTTCAAAACCGTTATTCTTATATCTATATGACCATTTCAGCCAAGTAATGACGAAAATTCCGTTTGTAAATATCAACTTTTTGGCAAAATCCGTTTTTCCAAATTTCGGTCATCAAATAATCAGTTTTTTTGCCACAACTTTATAAATATTTGTCTGAATACGGAATGTCATACCTCGCTGAGCTCGTAATTAAATTTCCA
Satellite_359bp_1pt688	CCACATTTTGCAAATTTTGATGACCCCCCTCCTTACAAAAAATGCGAAAATTGATCCAAAAATTAATTTCCCTAAATCCTTCAAAAAGTAATAGGGATCGTTAGCACTGGTAATTAGCTGCTCAAAACAGATATTCGTACATCTATGTGACCATTTTTAGCCAAGTTATAACGAAAATTTCGTTTGTAAATATCCACTTTTTTGCAGAGTCTGTTTTTCCAAATTTCGGTCATCAAATAATCATTTATTTTGCCACAACATAAAAAATAATTGTCTGAATATGGAATGTCATATCTCACTGAGCTCGTAATAAAATTTCCAATCAAACTGTGTTCAAAAATGGAAATTAAATTTTTTGG
S.element	CAGTTTGTCAAGAAACTGTTTACACACCGCAAAATAAGTAGAATTTTTGACTTTAAAGGCCAAAATTAAGGGTTTTTTGCTTAATTAAACGCAATTTTTTTATGAAATATAATTAAACAATATTTATTTTACTTATAAATTAAAAAACAAATTCAATATATCAAATATACAAGAAAATAAACAACAAATTTCTTGTTTACACACTTTTGAGAGTGCCAAGAAACTCTTTACACAGTTTTGGGTTCCTACTTTGTTTTGCTCTTTTTCTTAGAAACAATCTCATTTTTCCGTTATTTTTGTCTTATGCATTCCTTTTTACAACGCTTCTATTGCAATTTTTTCACTTTGCTTGTGAAATTTTGTTGATCTAACGTGCTTAAAGCGAATTATTAAATTTAA…
springer	AGTTAACTAAGTTAACCGGACTGATCGTCCGCACACCAGCACCGGTCAAACTGCTGACCAAGCATTTGGCCGGAAGCTCATGCATAGCCGGCAGAAGCTCTGCGCATTGGCAGAGGCCGCTATGATGTTTTTCCCTTTGTTAGCTTATAGTCAGTTTGATTTTGTATTCAATAAAGAGCGCATCGCGCCTTCAATCAACTCCAGCTACTGCTGTTATCATTGAATTGGTTGGCTAGCCTTAAGGGCAGTCAACAACGGAGAGACGTTCTCCCACCATATCTCCCAATCTAGGAGAAGAGGTCTGCGGCAACCGCCCTGCCTCCCAGTGACAGAAGAACCCCCCGTTACCTGCAACCTACGCCGGAGACCGCGGCGAGGGACCTGCACCTTATATTTAAT…
Stalker	TGTAGCATATTGGACTAATCTACCCTAAGAATACAATAGATGATTGGGTATAACATAGCGTCAATACATTGTGACACTTTGTCATAATAAATATAAATATACAAATATACAAAAAGACCACCAAAAACTACGTAAGCACTCCAGCGCCCCAGTAATACGATCTAACGCTTATACATAAGCCGATCGCGGAGCGTGGGAATGCTGAGCATGCACTTTGCAGCTCAAGTGGTCAATGCCTTCTGCATGCATATGTATATGTATAAATGTAAGTAAGAATACATAGATATAAGCAATGTATGTGCGGGTTAGCTGAACCCAACTTCAGCACACTTTGATCATTCGAATAAACAGATTCAAACAGAGCAGAGGTTCTGAGCTCGGAAAGCAAATCTATTACAT…
Stalker2	TGTAGTGTATCTACCCTCACTATAACTCTACTCTACATATATATAAGTAACGTACATACATTGTGACACTTTGTTGCAAACACAAATAAACATAATTCACATCAAAGACCACATGCACTTACATAAACACTCCAGCCAATGAAATACGATCTAACGCTTATACATAAGCCGATCGCGGAGCGTGAGAATGCTGAGCATGCACTTAGCAGCTCAAGTGGTCAAGCCATACATAACATATGTATGCCTTCTGCATACACATGTATATGTATATACAATATGTACAATATGTAAGAACACCATGTACGGGTAGCTGTACCCAAAGACAGCAACATAGGATTCATTCAAATAAAACGATTCAAACGGAACAGACGCTCTGAGCTATTCAATATCTATTACACT…
Tabor	TGTAATGTGCACACATATCGAATAAGCACTGTATCAAATCAGAACATTGGGAACAATCACATTGTAGCACTTTTGCAACAATGTTTATGTAAGACTTTTCAGTTCCCAGGCATATCTTGAGTGCTCAGCAATCTGACCACACAAGAATGCTATTCAGACCAGAAGTGCAGAGTCAGCATAATTAGCATGCGCGACTGCTCGATCTTTATGTCCACATGACTCTCTTAGACAGCGGCGCTCTCGCTGCCAAAGTTAAGTACATAAGAGCAAAGCAACGTCTCTGCCGACGGCCTCTCTGCCGGCGCAGACGGATTGCATTTGGCTAGCTTGGACTCTTCTAGACCAAGTACAAGGCAGTCGTAAAGGAGTCGTCAAAGAGCCTTCAACATGTCCTAATTG…
TAHRE	TTAAAAGCAAAGTTTTTTAAAAGTTCAAAAATATAATAAAATAAAGCAAATTAAATTTAATTAATAAAACAATTAATTTTATTTAATAAAATTAAACGCGCTTCGTCGGCAAATAACTCTCACGCGCAAATTTTATTAAATTCGCCTTTCAAGTTGAAAAATTAAAAGTTAAAATCGTCTTCCGGCCGCAAAGTTTGAACCGCGACGATACAAACATTTAATAGACAAACAAAAAGCGAACAATAAATCAGTGAATTATTTGTGCAAGCTGCCGCCATAACCAAAAGGAGAAGAAGCCAAAAGACGAAGAGGAGAAAGTAAACCAGGAGAAATTAAGAAGACAAGGAGGAAAACTTATTTAAAAAGACGACCTAAACTGGAGGACAAATTACAAATTAA…
TART.A	CACGCTTTTTGGCCCCTGGCCGATCTTCATATATCTCAAATCGACGGCTGCTTTTACCCTGGAAAAAAAAAAAGGAGCTTGGGTTATATTGAACTACACTAGGCGGCGACACACTCACCAGCAGCAGCCAGAACAACAACAGCGGCAGAAGTAGCAGGAAATTATCTCACTGCAAAATCCAATTGGCACTTTCCGAAGTCCGTATTTCTCGCCTGGCCCCTGGCCAGTAACAGGGGCCTGTGCGACGGAGATGACGACGATGATCTGCCCTGTGGACGGCCTCAAGAAGGAATCGGCCCTGTACTGCCCACCTGACCTGTGCCAGGATAGCAGCAATGTCAGCGGACCATGGATGGAAGAGGCGGCACTGGCGACGGTCCTCAGTTTTGCGGTTTCCGC…
TAS_2L	TCGACAATGCACGACAGAGGAAGCAGAACAGATATTTAGATTGCCTCTCATTTTCTCTCCCATATTATAGGGAGAAATATGATCGCGTATGCAGAGTAGTGCCAACATATTGTGCTCTTTGATTTTTTGGCAACCCAAAATGGTGGCGGATGAACGAGATGATAATATATTCAAGTTGCCGCTAATCAGAAATAAATTCATTGCAACGTTAAATACAGCACAATATATGATCGCGTATGCGAGAGTAGTGCCAACATATTGTGCTAATGAGTGCCTCTCGTTCTCTGTCTTATATTACCGCAAACCCAAAAAGACAATACACGACAGAGAGAGAGAGCAGCGGAGATATTTAGATTGCCTATTAAATATGATCGCGTATGCGAGAGTAGTGCCAACATA…
TAS_2R	TTATTAATATTGTTAATTAATATATTATTAATAAATTAGTGTGTCATCCATTTCGTTTATTCAGTTTGTTATTTGGTGCGGCGGCGCAGCAAGTACCGATCAACACGACCATTCAAACTTGACTGAAGGGATCTTCTTACATTTCCCTTCTTCAACATATTCTCTAATATCTATACACACTGGCGTTCACTACATTTTCATCTCCCTCTAACACACTATTCTTGACAACCCGATCGGACCTCACGCAGCTGCAGAGGTTGTTCGTGCCTCTGCCGCAGCGCTCGACAGAATTTTACTGAAGGAATCTTCTTACATTTCCCTTCTTCAACATATTCTCTAATATCTATACACACTGGCGTTCACTACATTGTCATCTCCCTCTAACACACTATTCTTGAC…
TAS_3L	TTAATTTTTGTTAGTTGCTTTTGTAAGATTATATTCGATAAAAATTGAAAAAAGATTTCCAGAAGGATAATGTTTTAAAAATATAATTTCTTTTATACACCGGCAAGAACAAAACGATTATTAATATTGTTAATTAATATATTATTAATAAGTTAGTGTCTCATCCATTTCCTTTATTCAGTTTATTATTTGGTGCGGCGGCGCAGCAAGTACCGATCAACACGACCAGTCAAACTTGACTGAAGGGATCTTCTTACATTTCCCTTCTTCAACATATTCTCTAATATCTATACACACTGGCGTTCACTACATTTTCATCTCCCTCTAACACACTATTCTTGACAACCCGATCGGACCTCACGCAGCTGCAGAGGTTGTTCGTGCCTCTGCCGCAGCGCT…
TAS_X	ACTAGTAATGCCGCGCTGCAACAGACGGGATACACAAACAAAACAATTAATTAATAACAAATTAAATAAAACAATAAAATAATGCACTTACCTCAATGAATACAGCTAATCACTGACCCACATCCAATGAAACAGACAAAAGGAGAAGGGCCCGCAAACGCAAAATAAAATCGCCAACTATGCGATTATAAACACAAAAAATTGACAATTTTGCGATGCCGTCCCCGACTCCTGATGCCACAGCATTGACAAGGATCACTAGCAAGGAGCTGACATTACATTAAAAAGTCTGCAAAATCCGTCCACAAATTTCATATTTTTCCTCAGTATCGTATCTTCAATGATTTTCCGACAACCTGAAAGGAAAGGAAAATTAATAAGAAAATTATACAAAACATA…
Tc1.2	CACTAGTGGGCATAAGTATTTAGACACCATTAGCTTGCAACTGCCGGGCTATGCTTTTCATAGTACAGTCAAATAAATAAGTAAACTATTGATGATAAAACAAAGAGTGCAATTACAGTTACACGCGAGAGGTATGTTTTGCCGTTTACCTTTTCAATTATCCTTCTGCTGATAAGAAAGCTAGACAGACAACGATTTGGGCGGTGGCAAAAGTATTTAGACATCACATTTAATTAGTTCGCATTGATCTGTTGTTCGAAGAATATCAAATTTTTGACTTTTTTAGATCATTTGAACATTTGTTCTTGATAACGTGTTACTACCTACTTTTATTTCATTCATAAATTTGTTAAACATGGGGAAAACAAAGGAACTGAGCGAATTTATAAAAAATGAAAT…
transib2	CACTATGGTCCAGAATTCGTTTTTTTTGGCATAAAGTCTAAATTTTTATGTCAATATATCGTCCTTTAGCAATTATTTTCTAATAGAAAATTGATCATATAAATAAAAACCAAAAACAAAATTGACCGAAAGCTTCACTAAATCGTTTTATGAGCTTTTAAAGGTGAAGTGTTAAACAGCTGATTGAGAGAATGCAATTCCCGCCAAATTATTTGCTTACTTTTGCACGTGGTACGATCGTTAATACGCATCCATAAATTATAGTAAAATATGGAAAATAAATGCCAAGGTATGTTGTTTTTAACGTATGTAGTTAATATATGTGTAGTTGTACTGTTTTTGTGTTGTGTAACATCCAATTTATGTGTATTTTAACAGAAAATTCTAACGTGTCCCCTG…
Transib5	CACAGTGGTTCCGTCAGAGGCCAAAAATAAAAAAAAACATCTAAATATATTTACGCATAAAGTAACCAAATTGTCTCCAAATAGTCAAAATATTTCCAGCCAAAACCAGTTTTTGCTTCAAACCTAACGGTACTTTCTAAAAATAGAATTAAAGTTATGCACACGTGTTCATTTGTGTAGCGAAATTGCACGCATTGTAATTTCTGCATTCCAAAAGCAAACTTCAAAGGCATCATACTTTCAGTGAGGAGCTTCGATTTAAATAATTTAAAATGGATTTTAAAGTAGAAGGTATTTACTTTGTATACAAAAACTAATAATTAACTAATCAGTTAACTAAGTTAAGTAAAATTAATATCTTCAAATGGCCTTTTTATTGTCTTTTTTGTGGGTATTTTC…
Transpac	AGTCATGTATACCCTTACATACCCTCTTATTAGATTAAGTTATGTTAGAATACACATGGCGCTAAGCTTTTTGTCTGAGCTTAGCTTTATTTTTAGTCAGTAGATAAGAAGACCTCGATCTGTACACATCATTGAATAAACCCTCAATTTGTTAAGCGAAACCTTTCGTTTTGTTTTAACCCCTCTTTAATCGACAAAGAAGTCGATGGGTGCTTAACTGAGGAGTTCAACCTTCAACCTACAGACGACAACGAAGTCGTTTCTGGAGGCAACGATCTTTTGGACACAACGGTCTCTGCTCGGAAGGCCCTATCAACCTTCCACATAACTGGCGACGAGGATCAACACAGAAAAAATAAGGAAACCAGCCATACGTCAAGAAATTCATTCGGAACCACA…
X.element	AATGTTAAATAAAGGTTCGTGTCTAACAATACGCACCTGACAAAGTGGATTAAGTGAAATTAGTTTTCGCGGTAATAAACTTATGGACAAGACCAGAATACTGGCACACATAGCAAATAGTGACCCCCCAAGTCACTAACAGTGAAATAATAGTGAAACGAAAACATTTTCATTCAAAAATACAAAGTTAAGTTTCTCGAACTGGGGCTCCGCTGCCCAGCTGCCACGCGATCGCACAAACAGCTGTTTGCGAGCTTAAAGCTTTCTATCCCAGGGTTCAAGTTTTGGCTAGAACCCTGGTGATTTGGTGCACACTTCAATATGAACACTTTAAATGAAACCGCTGCGGCTGATGAATCGTTGGATACTGCGTTTCTCTCGAGCCCCCAATGTGCTGCC…
ZAM	AGTTACCGACCCATCGGTACCATACACCACCCCTCCCTCTAAGCCACCACGCCTACACAAGTAGAAGACATCGAACCGGGAAGCTTTGCGATACAAAGTTGCAGCATAAACATCAACAACGGGTCAGACGCCGACATCCGCCCAAAATGCTGACACCACATCCTTTTCGCTCAGACAGAACAACGCATACAATTCCATATACATACGTATAAACATACTCATACTTTCTGCTGTGTCAGATACTTTATTTCTAAGAACTTTAACATTGTAATACATACACACATATTCACTGTTAGCCCATTTAAGACGAAGAATAAAGACGACCACAGTCGAGTGCAAGCAGCAAACACTTGTAGACGTACATAATCTCCGATCAAAATTCTCCCAAGACGACCGTGG…
