# Supplementary material for: The Drosophila ZAD zinc finger protein Kipferl guides Rhino to piRNA clusters
Source: eLife. 2022 Oct 4;11:e80067. doi: 10.7554/eLife.80067 (PMC9531945; doi:10.7554/eLife.80067)
Supplement: Supplementary file 5. [file elife-80067-supp5.xlsx]

## Sheet: Sheet1
chr	start	end	elemtent	nr of called insertions fused
chr2L	512699	512700	mdg3	1
chr2L	1197092	1197093	i-element_new	1
chr2L	1433898	1433899	transpac	1
chr2L	1444236	1444237	micropia	1
chr2L	1599256	1599257	doc	1
chr2L	2079362	2079363	transpac	1
chr2L	2308656	2308657	flea	1
chr2L	2603008	2603009	i-element_new	1
chr2L	2966638	2966639	i-element_new	1
chr2L	4241014	4241015	diver	1
chr2L	4301774	4301775	doc	1
chr2L	4844854	4844855	doc	1
chr2L	4857288	4857289	flea,i-element_new	2
chr2L	5076099	5076100	doc	1
chr2L	5865381	5865382	i-element_new	1
chr2L	6221278	6221279	doc	1
chr2L	6812336	6812337	burdock	1
chr2L	7621067	7621068	flea	1
chr2L	7678082	7678083	diver	1
chr2L	7971312	7971313	rover	1
chr2L	8692965	8692966	burdock	1
chr2L	8803966	8803968	hms-beagle2,hms-beagle	2
chr2L	9504927	9504928	mdg3	1
chr2L	9606429	9606430	i-element_new	1
chr2L	9801400	9801401	hms-beagle2,hms-beagle	2
chr2L	9930896	9930897	blood	1
chr2L	10149048	10149049	i-element_new	1
chr2L	11303383	11303384	doc	1
chr2L	12307509	12307510	flea	1
chr2L	12616778	12616779	doc	1
chr2L	12777757	12777758	burdock	1
chr2L	12931565	12931566	burdock	1
chr2L	13274158	13274159	transpac	1
chr2L	13430478	13430479	doc	1
chr2L	13819810	13819811	diver	1
chr2L	13893105	13893106	blood	1
chr2L	13943739	13943740	blood	1
chr2L	14673171	14673172	doc	1
chr2L	14774639	14774640	burdock	1
chr2L	14969700	14969701	rover	1
chr2L	15105010	15105011	burdock	1
chr2L	15235820	15235821	burdock	1
chr2L	15360907	15360908	hms-beagle	1
chr2L	15931021	15931022	hms-beagle2,hms-beagle	2
chr2L	15994214	15994215	doc	1
chr2L	16107685	16107686	doc	1
chr2L	16394903	16394904	burdock	1
chr2L	16589103	16589104	burdock	1
chr2L	16723251	16723252	doc	1
chr2L	16839169	16839170	doc	1
chr2L	16933672	16933673	flea	1
chr2L	17637470	17637471	doc	1
chr2L	17936905	17936906	burdock	1
chr2L	18234754	18234755	diver	1
chr2L	18302750	18302751	blood	1
chr2L	18538465	18538466	doc	1
chr2L	18558395	18558396	hms-beagle	1
chr2L	18693706	18693707	doc	1
chr2L	19082396	19082397	transpac	1
chr2L	19088687	19088688	flea	1
chr2L	19217621	19217622	doc	1
chr2L	19372212	19372213	doc	1
chr2L	19394056	19394057	transpac	1
chr2L	19409016	19409017	doc	1
chr2L	20018621	20018622	transpac	1
chr2L	20252124	20252125	doc	1
chr2L	20463555	20463556	3s18	1
chr2L	20626380	20626381	doc	1
chr2L	21089208	21089212	flea,flea	1
chr2L	21090932	21090943	flea,flea	1
chr2L	21752587	21752588	doc	1
chr2L	21802907	21802908	burdock	1
chr2L	21837943	21837944	transpac	1
chr2L	21923478	21923479	doc	1
chr2L	22080746	22080747	transpac	1
chr2L	22094446	22094447	flea	1
chr2R	5880380	5880381	doc	1
chr2R	6171217	6171218	micropia	1
chr2R	6539418	6539419	doc	1
chr2R	6746202	6746203	diver	1
chr2R	6818055	6818056	blood	1
chr2R	6849488	6849489	blood	1
chr2R	6892491	6892492	hms-beagle2,hms-beagle	2
chr2R	8967448	8967449	transpac	1
chr2R	9422045	9422046	i-element_new	1
chr2R	9463611	9463612	doc	1
chr2R	9698812	9698813	i-element_new	1
chr2R	10020499	10020500	mdg3	1
chr2R	10605238	10605241	doc,doc3-element	2
chr2R	11678132	11678133	doc,f-element	2
chr2R	11771844	11771845	micropia	1
chr2R	11909738	11909739	doc	1
chr2R	12253277	12253278	3s18	1
chr2R	12298351	12298352	transpac	1
chr2R	12769764	12769765	blood	1
chr2R	13025181	13025182	mdg3	1
chr2R	13689474	13689475	hms-beagle2,hms-beagle	2
chr2R	14310060	14310061	hms-beagle	1
chr2R	15172197	15172198	doc	1
chr2R	15311325	15311416	diver,3s18	2
chr2R	15396487	15396488	3s18	1
chr2R	15424139	15424140	transpac	1
chr2R	15650839	15650840	hms-beagle	1
chr2R	15690161	15690162	i-element_new	1
chr2R	15832754	15832755	transpac	1
chr2R	16008093	16008094	i-element_new	1
chr2R	16075345	16075346	flea	1
chr2R	16091361	16091362	mdg3	1
chr2R	16280696	16280697	blood	1
chr2R	16960629	16960630	hms-beagle2,hms-beagle	2
chr2R	17252332	17252333	flea	1
chr2R	17530808	17530809	3s18	1
chr2R	18055940	18055941	i-element_new	1
chr2R	18375711	18375712	blood	1
chr2R	18917204	18917205	transpac	1
chr2R	18950151	18950152	i-element_new	1
chr2R	19221422	19221423	i-element_new	1
chr2R	19688392	19688393	doc	1
chr2R	19797560	19797561	hms-beagle	1
chr2R	19925205	19925206	burdock	1
chr2R	20046206	20046207	transpac	1
chr2R	20413133	20413134	diver	1
chr2R	20530880	20530881	rover	1
chr2R	20556194	20556195	burdock	1
chr2R	20737677	20737678	diver	1
chr2R	20870407	20870408	blood	1
chr2R	21348989	21348990	doc	1
chr2R	21598193	21598194	blood	1
chr2R	21684872	21684873	i-element_new	1
chr2R	21752182	21752183	blood	1
chr2R	22012122	22012123	blood	1
chr2R	22124765	22124766	mdg3	1
chr2R	22361868	22361869	diver	1
chr2R	23042016	23042017	doc	1
chr2R	23169053	23169054	i-element_new	1
chr2R	23342171	23342172	i-element_new	1
chr2R	23437762	23437763	doc	1
chr2R	24422625	24422626	diver	1
chr2R	25189695	25189696	hms-beagle2,hms-beagle	2
chr2R	25239432	25239433	i-element_new	1
chr3L	158707	158708	i-element_new	1
chr3L	299253	299254	flea	1
chr3L	372867	372868	doc	1
chr3L	762953	762954	hms-beagle2,hms-beagle	2
chr3L	1057881	1057882	blood	1
chr3L	1586285	1586286	transpac	1
chr3L	2411065	2411066	hms-beagle,ivk	2
chr3L	3023145	3023146	i-element_new	1
chr3L	4410978	4410979	i-element_new,quasimodo	2
chr3L	4445993	4445994	3s18	1
chr3L	5502494	5502495	doc	1
chr3L	5516741	5516742	blood	1
chr3L	7184225	7184226	blood	1
chr3L	7236706	7236707	mdg3	1
chr3L	8518406	8518407	hms-beagle2,hms-beagle	2
chr3L	9229052	9229053	hms-beagle2,hms-beagle	2
chr3L	9590206	9590207	burdock	1
chr3L	9926730	9926731	doc	1
chr3L	10041318	10041319	blood	1
chr3L	10168154	10168155	transpac	1
chr3L	10668186	10668187	transpac	1
chr3L	11432919	11432920	doc	1
chr3L	11877866	11877867	3s18	1
chr3L	12052043	12052044	i-element_new	1
chr3L	12165282	12165283	micropia	1
chr3L	12863727	12863728	transpac	1
chr3L	12966135	12966136	doc	1
chr3L	13293761	13293762	mdg3	1
chr3L	13781156	13781157	i-element_new	1
chr3L	14020229	14020230	3s18	1
chr3L	14054413	14054414	hms-beagle2,hms-beagle	2
chr3L	14272012	14272013	3s18	1
chr3L	15255243	15255244	i-element_new	1
chr3L	15381206	15381207	i-element_new	1
chr3L	15447941	15447942	doc	1
chr3L	18150650	18150651	doc	1
chr3L	18815300	18815306	hms-beagle,hms-beagle2	2
chr3L	19112912	19112913	blood	1
chr3L	19395844	19395845	burdock	1
chr3L	19396978	19396979	doc	1
chr3L	21636497	21636498	hms-beagle2,hms-beagle	2
chr3L	21970946	21970947	transpac	1
chr3L	22537627	22537628	i-element_new	1
chr3R	5712146	5712147	doc	1
chr3R	6190374	6190375	doc	1
chr3R	6220555	6220556	doc	1
chr3R	7141925	7141926	diver	1
chr3R	7550175	7550176	transpac	1
chr3R	7865004	7865005	mdg3	1
chr3R	7868855	7868856	3s18	1
chr3R	8888166	8888167	flea	1
chr3R	11717302	11717303	flea	1
chr3R	12363331	12363332	doc	1
chr3R	13285823	13285824	transpac	1
chr3R	13480610	13480611	flea	1
chr3R	13602439	13602440	hms-beagle,mdg1	2
chr3R	13761506	13761507	flea	1
chr3R	13864217	13864218	i-element_new	1
chr3R	14843150	14843151	mdg3	1
chr3R	15058282	15058283	diver	1
chr3R	15697086	15697087	3s18	1
chr3R	19255447	19255448	hms-beagle,mdg1	2
chr3R	20481739	20481740	doc	1
chr3R	21420395	21420396	doc	1
chr3R	21892066	21892067	blood	1
chr3R	22127187	22127188	burdock	1
chr3R	22187906	22187907	mdg3	1
chr3R	22191606	22191607	blood	1
chr3R	22597211	22597212	doc	1
chr3R	23290820	23290821	mdg3	1
chr3R	24184061	24184062	blood	1
chr3R	26785719	26785720	burdock	1
chr3R	27137944	27137945	rover	1
chr3R	28138704	28138705	blood	1
chr3R	28140364	28140365	transpac	1
chr3R	28424470	28424471	doc,f-element	2
chr3R	28947048	28947049	blood	1
chr3R	29032378	29032379	transpac	1
chr3R	29952741	29952742	rover	1
chr3R	29980614	29980615	doc	1
chr3R	30065281	30065282	doc	1
chr3R	30574865	30574866	mdg3	1
chr3R	31102338	31102342	hms-beagle2,hms-beagle	2
chr3R	31196147	31196148	flea	1
chr3R	31269253	31269254	hms-beagle2,hms-beagle	2
chrX	1272457	1272458	doc	1
chrX	1583759	1583760	hms-beagle2,hms-beagle	2
chrX	1949025	1949026	hms-beagle2,hms-beagle	2
chrX	2108716	2108720	hms-beagle2,hms-beagle	2
chrX	2189726	2189727	doc	1
chrX	2746140	2746141	i-element_new	1
chrX	3096564	3096565	burdock	1
chrX	3200164	3200165	i-element_new	1
chrX	3232667	3232668	flea	1
chrX	3248679	3248680	i-element_new	1
chrX	3283781	3283782	doc	1
chrX	3327711	3327712	flea	1
chrX	3433492	3433493	micropia	1
chrX	4971259	4971260	doc	1
chrX	5015534	5015535	flea	1
chrX	5351164	5351165	doc	1
chrX	6133091	6133092	doc	1
chrX	6145092	6145093	diver	1
chrX	7138683	7138684	burdock	1
chrX	7554154	7554155	i-element_new	1
chrX	7626225	7626226	i-element_new	1
chrX	8921030	8921031	flea	1
chrX	10183690	10183691	mdg3	1
chrX	10283731	10283732	rover	1
chrX	10300979	10300980	mdg3	1
chrX	10417492	10417493	flea	1
chrX	10738408	10738409	mdg3	1
chrX	10983630	10983631	flea	1
chrX	11650560	11650561	transpac	1
chrX	11914246	11914247	flea	1
chrX	11921650	11921651	flea	1
chrX	11974066	11974067	flea	1
chrX	12079001	12079002	i-element_new	1
chrX	12088116	12088117	i-element_new	1
chrX	12295834	12295835	flea	1
chrX	12426425	12426426	blood	1
chrX	14330937	14330938	mdg3	1
chrX	14734560	14734561	burdock	1
chrX	15012562	15012563	mdg3	1
chrX	15228674	15228675	3s18	1
chrX	15534686	15534687	diver	1
chrX	16445998	16445999	i-element_new	1
chrX	16903537	16903538	i-element_new	1
chrX	18410343	18410344	doc	1
chrX	18412144	18412145	flea	1
chrX	18753363	18753364	i-element_new	1
chrX	19119848	19119849	mdg3	1
chrX	19454916	19454917	flea	1
chrX	19610517	19610518	transpac	1
chrX	19730434	19730435	diver	1
chrX	19785102	19785103	burdock	1
chrX	20381732	20381733	hms-beagle2,hms-beagle	2
chrX	20385350	20385351	doc	1
chrX	20564950	20564951	flea	1
chrX	20943678	20943679	transpac	1
chrX	21087687	21087688	mdg3	1
chrX	21098114	21098115	mdg3	1
chrX	21213364	21213365	doc	1
chrX	21249183	21249184	blood	1
chrX	21428421	21428422	i-element_new	1
